# Supplementary material for: Chemotaxis and Shorter O-Antigen Chain Length Contribute to the Strong Desiccation Tolerance of a Food-Isolated Cronobacter sakazakii Strain
Source: Front Microbiol. 2022 Jan 4;12:779538. doi: 10.3389/fmicb.2021.779538 (PMC8764414; doi:10.3389/fmicb.2021.779538)
Supplement: Supplementary file 2 [file Table_2.xlsx]

## Sheet: DEGs (≥2.0-fold change)
Table S2 Transcriptional analyses of desiccated C. sakazakii
Gene_id	readcount_CS_treated	readcount_CS_control	log2.Fold_change.	fold change	gene_name	pvalue	qvalue	signature	description
LILKMKPI_00001	1710.95	257.563	2.7318	6.64284	dnaA	1.871e-128	8.1424e-128	TRUE	Chromosomal replication initiator protein DnaA
LILKMKPI_00002	389.915	123.672	1.6566	3.15273	dnaN	4.0951e-09	2.3057e-09	TRUE	DNA polymerase III subunit beta
LILKMKPI_00003	221.003	35.6945	2.6303	6.19155	recF_1	7.5727e-17	6.0621e-17	TRUE	DNA replication and repair protein RecF
LILKMKPI_00004	955.636	303.921	1.6528	3.14443	gyrB	4.8051e-20	4.3109e-20	TRUE	DNA gyrase subunit B
LILKMKPI_00016	235.175	97.6044	1.2687	2.40944	ibpA	0.012729	0.0040741	TRUE	Small heat shock protein IbpA
LILKMKPI_00017	379.573	44.2849	3.0995	8.57122	ibpB	3.0723e-37	4.1725e-37	TRUE	Small heat shock protein IbpB
LILKMKPI_00144	191.893	57.0223	1.7507	3.36522	priA	5.6155e-06	2.5147e-06	TRUE	Primosomal protein N'
LILKMKPI_00145	4675.15	507.276	3.2042	9.21638	rpmE	0	0	TRUE	50S ribosomal protein L31
LILKMKPI_00147	188.446	23.4014	3.0095	8.05285	metB	1.9891e-18	1.6994e-18	TRUE	Cystathionine gamma-synthase
LILKMKPI_00148	237.09	65.9089	1.8469	3.59726	metL	3.7476e-08	1.9759e-08	TRUE	Bifunctional aspartokinase/homoserine dehydrogenase 2
LILKMKPI_00149	99.5853	4.4433	4.4862	22.412	metF	8.5796e-17	6.8611e-17	TRUE	5%2C10-methylenetetrahydrofolate reductase
LILKMKPI_00151	120.268	17.9213	2.7465	6.71087	mqo	1.3207e-10	8.0213e-11	TRUE	Malate:quinone oxidoreductase
LILKMKPI_00162	474.945	201.578	1.2364	2.3561	oxyR_1	0.0010534	0.00038289	TRUE	Hydrogen peroxide-inducible genes activator
LILKMKPI_00191	2156.79	908.802	1.2468	2.37314	rho	7.6337e-13	5.1793e-13	TRUE	Transcription termination factor Rho
LILKMKPI_00207	88.4777	21.624	2.0327	4.0917	--	0.00010865	4.3508e-05	TRUE	hypothetical protein
LILKMKPI_00220	329.781	114.785	1.5226	2.87308	corA_1	4.2712e-06	1.9314e-06	TRUE	Magnesium transport protein CorA
LILKMKPI_00223	106.097	24.29	2.1269	4.36778	--	6.5993e-06	2.9336e-06	TRUE	hypothetical protein
LILKMKPI_00225	129.844	45.6178	1.5091	2.84632	pldA	0.0046206	0.0015702	TRUE	Phospholipase A1
LILKMKPI_00226	225.216	64.4278	1.8056	3.49575	recQ	2.2913e-07	1.1438e-07	TRUE	ATP-dependent DNA helicase RecQ
LILKMKPI_00228	119.119	43.2481	1.4617	2.75433	rhtB_2	0.011278	0.0036468	TRUE	Homoserine/homoserine lactone efflux protein
LILKMKPI_00231	45.1964	11.5526	1.968	3.91225	--	0.0082302	0.0027126	TRUE	hypothetical protein
LILKMKPI_00232	191.893	11.1082	4.1106	17.2748	metR	2.1532e-28	2.3822e-28	TRUE	HTH-type transcriptional regulator MetR
LILKMKPI_00238	208.746	83.534	1.3213	2.49891	--	0.0085709	0.0028198	TRUE	hypothetical protein
LILKMKPI_00245	206.448	54.0601	1.9331	3.81875	rfaH	3.7436e-08	1.9751e-08	TRUE	Transcription antitermination protein RfaH
LILKMKPI_00267	996.619	180.25	2.467	5.52893	secE	2.1461e-61	4.4604e-61	TRUE	Protein translocase subunit SecE
LILKMKPI_00268	653.816	141.297	2.2102	4.62739	nusG	6.6814e-32	8.0473e-32	TRUE	Transcription termination/antitermination protein NusG
LILKMKPI_00269	1404.92	355.316	1.9833	3.95396	rplK	3.1573e-50	5.454e-50	TRUE	50S ribosomal protein L11
LILKMKPI_00270	1752.32	385.826	2.1832	4.5416	rplA	4.2641e-80	1.1309e-79	TRUE	50S ribosomal protein L1
LILKMKPI_00271	1894.04	642.945	1.5587	2.94588	rplJ	6.8459e-31	7.9772e-31	TRUE	50S ribosomal protein L10
LILKMKPI_00272	897.8	342.874	1.3887	2.61843	rplL	6.203e-10	3.6518e-10	TRUE	50S ribosomal protein L7/L12
LILKMKPI_00273	1973.7	780.983	1.3375	2.52713	rpoB	6.739e-17	5.4112e-17	TRUE	DNA-directed RNA polymerase subunit beta
LILKMKPI_00308	49.7927	6.66494	2.9013	7.47099	--	1.3277e-05	5.756e-06	TRUE	hypothetical protein
LILKMKPI_00313	348.932	26.0673	3.7426	13.3855	fis	4.7951e-45	7.4943e-45	TRUE	DNA-binding protein Fis
LILKMKPI_00314	3897.62	223.794	4.1223	17.4155	dus	0	0	TRUE	putative tRNA-dihydrouridine synthase
LILKMKPI_00318	338.59	93.7536	1.8526	3.6115	accC	3.9125e-11	2.4577e-11	TRUE	Biotin carboxylase
LILKMKPI_00320	241.303	43.2481	2.4801	5.57936	aroQ	2.8045e-16	2.2069e-16	TRUE	3-dehydroquinate dehydratase
LILKMKPI_00321	103.799	20.7354	2.3236	5.0058	msrQ	6.3887e-07	3.0912e-07	TRUE	Protein-methionine-sulfoxide reductase heme-binding subunit MsrQ
LILKMKPI_00322	514.397	96.1233	2.4199	5.35134	msrP	3.21e-31	3.7852e-31	TRUE	Protein-methionine-sulfoxide reductase catalytic subunit MsrP
LILKMKPI_00324	533.931	156.256	1.7727	3.41693	csrD	1.0492e-14	7.7676e-15	TRUE	RNase E specificity factor CsrD
LILKMKPI_00326	119.502	30.8069	1.9557	3.87904	mreC	2.0615e-05	8.7727e-06	TRUE	Cell shape-determining protein MreC
LILKMKPI_00335	55.538	16.144	1.7825	3.44022	aaeB_1	0.011861	0.0038198	TRUE	p-hydroxybenzoic acid efflux pump subunit AaeB
LILKMKPI_00338	536.612	9.77525	5.7786	54.8949	bhsA_1	1.6699e-97	5.2406e-97	TRUE	Multiple stress resistance protein BhsA
LILKMKPI_00339	994.704	35.5464	4.8065	27.9834	bhsA_2	1.3937e-161	7.2705e-161	TRUE	Multiple stress resistance protein BhsA
LILKMKPI_00346	3743.26	617.766	2.5992	6.05951	rplM	3.8983e-252	3.1987e-251	TRUE	50S ribosomal protein L13
LILKMKPI_00347	1848.46	203.503	3.1832	9.0832	rpsI	3.8828e-182	2.371e-181	TRUE	30S ribosomal protein S9
LILKMKPI_00348	1864.16	582.664	1.6778	3.1994	sspA	1.5306e-39	2.1842e-39	TRUE	Stringent starvation protein A
LILKMKPI_00349	449.666	144.111	1.6417	3.12033	sspB	5.2438e-10	3.0987e-10	TRUE	Stringent starvation protein B
LILKMKPI_00350	224.067	89.1621	1.3294	2.51298	lutR_2	0.0056403	0.0018898	TRUE	HTH-type transcriptional regulator LutR
LILKMKPI_00372	246.282	67.6862	1.8634	3.63864	yrbG	1.3011e-08	7.0782e-09	TRUE	Inner membrane protein YrbG
LILKMKPI_00373	486.819	79.8312	2.6084	6.09827	mlaF	1.3433e-34	1.7149e-34	TRUE	putative phospholipid import ATP-binding protein MlaF
LILKMKPI_00374	86.9457	16.2921	2.4159	5.33652	mlaE	1.8564e-06	8.668e-07	TRUE	putative phospholipid ABC transporter permease protein MlaE
LILKMKPI_00375	103.033	30.6587	1.7487	3.36056	mlaD	0.00089824	0.00032894	TRUE	putative phospholipid ABC transporter-binding protein MlaD
LILKMKPI_00376	311.779	115.674	1.4305	2.6954	mlaC	9.3731e-05	3.7882e-05	TRUE	putative phospholipid-binding protein MlaC
LILKMKPI_00377	132.142	32.288	2.033	4.09255	mlaB	2.2322e-06	1.0343e-06	TRUE	putative phospholipid ABC transporter-binding protein MlaB
LILKMKPI_00378	94.9891	29.7701	1.6739	3.19076	ibaG	0.0031114	0.0010764	TRUE	Acid stress protein IbaG
LILKMKPI_00379	377.275	113.896	1.7279	3.31245	murA	4.7454e-10	2.8084e-10	TRUE	UDP-N-acetylglucosamine 1-carboxyvinyltransferase
LILKMKPI_00380	574.148	79.0907	2.8598	7.25915	--	3.0283e-48	5.0113e-48	TRUE	hypothetical protein
LILKMKPI_00382	1925.83	366.72	2.3927	5.25139	rplU	3.1278e-109	1.125e-108	TRUE	50S ribosomal protein L21
LILKMKPI_00383	313.311	46.8027	2.7429	6.69415	rpmA	3.8961e-25	4.0703e-25	TRUE	50S ribosomal protein L27
LILKMKPI_00384	841.113	94.1979	3.1585	8.92901	yhbE	7.0353e-83	1.9242e-82	TRUE	putative inner membrane transporter YhbE
LILKMKPI_00385	840.347	212.093	1.9863	3.9622	obgE	7.4777e-31	8.6877e-31	TRUE	GTPase ObgE/CgtA
LILKMKPI_00389	348.166	83.0896	2.067	4.19014	greA	3.9279e-15	2.9411e-15	TRUE	Transcription elongation factor GreA
LILKMKPI_00395	7897.12	1042.55	2.9212	7.57476	secG	0	0	TRUE	Protein-export membrane protein SecG
LILKMKPI_00398	1959.15	205.577	3.2525	9.53016	rimP	1.0669e-199	7.3077e-199	TRUE	Ribosome maturation factor RimP
LILKMKPI_00399	2121.17	252.824	3.0687	8.39017	nusA	2.2535e-196	1.5043e-195	TRUE	Transcription termination/antitermination protein NusA
LILKMKPI_00400	3257.21	734.773	2.1483	4.43305	infB	2.1779e-141	1.0335e-140	TRUE	Translation initiation factor IF-2
LILKMKPI_00401	207.98	69.1673	1.5883	3.00695	rbfA	7.1746e-05	2.9297e-05	TRUE	30S ribosome-binding factor
LILKMKPI_00402	384.553	77.9058	2.3034	4.9362	truB	2.4358e-21	2.2841e-21	TRUE	tRNA pseudouridine synthase B
LILKMKPI_00403	2129.98	407.154	2.3872	5.23141	rpsO	5.5671e-120	2.2722e-119	TRUE	30S ribosomal protein S15
LILKMKPI_00404	2983.73	1234.79	1.2728	2.4163	pnp	3.0724e-19	2.7162e-19	TRUE	Polyribonucleotide nucleotidyltransferase
LILKMKPI_00405	8396.96	1493.98	2.4907	5.62051	nlpI	0	0	TRUE	Lipoprotein NlpI
LILKMKPI_00406	9521.89	207.354	5.5211	45.9216	deaD	0	0	TRUE	ATP-dependent RNA helicase DeaD
LILKMKPI_00415	2669.65	280.372	3.2512	9.52157	yfkM_1	2.996e-271	2.6516e-270	TRUE	General stress protein 18
LILKMKPI_00426	65.8795	13.6261	2.2735	4.83495	yhaK	0.00011168	4.4656e-05	TRUE	Pirin-like protein YhaK
LILKMKPI_00462	107.246	23.5495	2.1872	4.55421	rlmG	2.6347e-06	1.2137e-06	TRUE	Ribosomal RNA large subunit methyltransferase G
LILKMKPI_00469	63.9644	6.96116	3.1999	9.18895	yqjH	7.6602e-08	3.9335e-08	TRUE	NADPH-dependent ferric-chelate reductase
LILKMKPI_00470	195.34	32.5842	2.5837	5.99475	--	1.4279e-14	1.0502e-14	TRUE	hypothetical protein
LILKMKPI_00490	621.259	251.194	1.3064	2.47324	lptF	1.0895e-05	4.7545e-06	TRUE	Lipopolysaccharide export system permease protein LptF
LILKMKPI_00533	29.4926	2.66598	3.4676	11.0625	slyA_1	0.00010285	4.1313e-05	TRUE	Transcriptional regulator SlyA
LILKMKPI_00548	294.543	106.935	1.4617	2.75433	dnaT	6.747e-05	2.758e-05	TRUE	Primosomal protein 1
LILKMKPI_00549	60.1342	7.5536	2.9929	7.96073	ohrB_1	8.5175e-07	4.0783e-07	TRUE	Organic hydroperoxide resistance protein OhrB
LILKMKPI_00550	239.771	49.3206	2.2814	4.86149	ohrR	1.3351e-13	9.3728e-14	TRUE	Organic hydroperoxide resistance transcriptional regulator
LILKMKPI_00557	135.589	6.81305	4.3148	19.9014	fhuF	1.559e-21	1.4778e-21	TRUE	Ferric iron reductase protein FhuF
LILKMKPI_00559	70.4758	3.25842	4.4349	21.6291	--	3.3066e-12	2.1814e-12	TRUE	hypothetical protein
LILKMKPI_00564	250.112	56.8742	2.1367	4.39755	holD	3.3824e-12	2.2296e-12	TRUE	DNA polymerase III subunit psi
LILKMKPI_00565	69.3267	9.47903	2.8706	7.31369	rimI_1	3.6015e-07	1.772e-07	TRUE	Ribosomal-protein-alanine acetyltransferase
LILKMKPI_00567	218.322	74.3512	1.554	2.9363	prfC	9.6828e-05	3.8994e-05	TRUE	Peptide chain release factor RF3
LILKMKPI_00575	965.978	237.272	2.0254	4.07105	deoB	4.1226e-37	5.5702e-37	TRUE	Phosphopentomutase
LILKMKPI_00579	181.552	67.39	1.4298	2.69409	serB	0.0029064	0.001009	TRUE	Phosphoserine phosphatase
LILKMKPI_00582	194.574	44.433	2.1306	4.379	--	9.568e-10	5.5869e-10	TRUE	Zinc-type alcohol dehydrogenase-like protein
LILKMKPI_00599	459.242	74.9436	2.6154	6.12793	rob	6.5778e-33	8.1725e-33	TRUE	Right origin-binding protein
LILKMKPI_00613	45.1964	12.2931	1.8784	3.67667	proP_1	0.013672	0.0043566	TRUE	Proline/betaine transporter
LILKMKPI_00615	1485.35	525.642	1.4987	2.82588	dnaK_1	3.5486e-21	3.304e-21	TRUE	Chaperone protein DnaK
LILKMKPI_00616	420.94	97.3082	2.113	4.3259	dnaJ	5.6539e-19	4.954e-19	TRUE	Chaperone protein DnaJ
LILKMKPI_00624	122.567	25.0306	2.2918	4.89667	--	1.0274e-07	5.2181e-08	TRUE	hypothetical protein
LILKMKPI_00639	655.731	252.083	1.3792	2.60124	carA	2.0121e-07	1.0083e-07	TRUE	Carbamoyl-phosphate synthase small chain
LILKMKPI_00645	97.6702	20.5873	2.2462	4.74432	rhtC_2	3.5657e-06	1.6292e-06	TRUE	Threonine efflux protein
LILKMKPI_00646	470.349	72.4257	2.6992	6.49442	folA	8.6082e-36	1.1245e-35	TRUE	Dihydrofolate reductase
LILKMKPI_00653	415.194	115.229	1.8493	3.60325	djlA	2.954e-13	2.0393e-13	TRUE	Co-chaperone protein DjlA
LILKMKPI_00656	400.639	86.7924	2.2067	4.61618	polB	4.2057e-20	3.7775e-20	TRUE	DNA polymerase II
LILKMKPI_00662	267.348	53.912	2.31	4.95883	yabI	2.0981e-15	1.5968e-15	TRUE	Inner membrane protein YabI
LILKMKPI_00692	13381.2	1714.96	2.964	7.80284	lpxC	0	0	TRUE	UDP-3-O-acyl-N-acetylglucosamine deacetylase
LILKMKPI_00693	401.789	82.9415	2.2763	4.84434	secM	1.2139e-21	1.1535e-21	TRUE	Secretion monitor
LILKMKPI_00719	3469.02	156.404	4.4712	22.1802	pdhR_1	0	0	TRUE	Pyruvate dehydrogenase complex repressor
LILKMKPI_00720	2030.01	513.349	1.9835	3.95451	aceE	8.3957e-72	1.986e-71	TRUE	Pyruvate dehydrogenase E1 component
LILKMKPI_00721	843.411	335.173	1.3313	2.51629	aceF	6.9854e-08	3.5987e-08	TRUE	Dihydrolipoyllysine-residue acetyltransferase component of pyruvate dehydrogenase complex
LILKMKPI_00731	166.997	40.7302	2.0357	4.10022	speE	9.9163e-08	5.046e-08	TRUE	Polyamine aminopropyltransferase
LILKMKPI_00734	1405.69	236.383	2.5721	5.94674	gcd	8.4371e-94	2.5463e-93	TRUE	Quinoprotein glucose dehydrogenase
LILKMKPI_00735	202.618	30.3625	2.7384	6.6733	hpt	9.177e-17	7.3166e-17	TRUE	Hypoxanthine phosphoribosyltransferase
LILKMKPI_00751	200.703	22.957	3.1281	8.74283	fhuA_1	9.2812e-21	8.5109e-21	TRUE	Ferrichrome-iron receptor
LILKMKPI_00752	31.0247	2.9622	3.3887	10.4737	fhuC	9.0119e-05	3.6441e-05	TRUE	Iron(3+)-hydroxamate import ATP-binding protein FhuC
LILKMKPI_00755	367.7	131.522	1.4832	2.79568	hemL	4.3117e-06	1.9486e-06	TRUE	Glutamate-1-semialdehyde 2%2C1-aminomutase
LILKMKPI_00759	73.1569	23.1051	1.6628	3.1663	btuF	0.010351	0.0033638	TRUE	Vitamin B12-binding protein
LILKMKPI_00762	3292.44	621.321	2.4057	5.29893	degP	9.9982e-188	6.2506e-187	TRUE	Periplasmic serine endoprotease DegP
LILKMKPI_00767	3185.58	854.742	1.898	3.72696	rpsB	2.4009e-98	7.6566e-98	TRUE	30S ribosomal protein S2
LILKMKPI_00768	1117.65	509.794	1.1325	2.19238	tsf	0.0002276	8.8579e-05	TRUE	Elongation factor Ts
LILKMKPI_00769	266.965	88.1254	1.599	3.02933	pyrH	5.1961e-06	2.3348e-06	TRUE	Uridylate kinase
LILKMKPI_00772	455.794	143.37	1.6686	3.17906	uppS	1.1892e-10	7.2559e-11	TRUE	Ditrans%2Cpolycis-undecaprenyl-diphosphate synthase ((2E%2C6E)-farnesyl-diphosphate specific)
LILKMKPI_00773	185.382	70.3522	1.3978	2.63499	cdsA	0.0043123	0.0014686	TRUE	Phosphatidate cytidylyltransferase
LILKMKPI_00799	152.825	18.81	3.0223	8.12462	metN_1	2.4456e-15	1.8541e-15	TRUE	Methionine import ATP-binding protein MetN
LILKMKPI_00806	60.9003	11.9969	2.3438	5.07638	dkgB	0.00011666	4.6599e-05	TRUE	2%2C5-diketo-D-gluconic acid reductase B
LILKMKPI_00810	11718.9	562.521	4.3808	20.833	mltD	0	0	TRUE	Membrane-bound lytic murein transglycosylase D
LILKMKPI_00919	9791.15	2163.44	2.1782	4.52589	--	0	0	TRUE	hypothetical protein
LILKMKPI_00924	91.1589	19.9948	2.1888	4.55926	gap1	1.4587e-05	6.296e-06	TRUE	Glyceraldehyde-3-phosphate dehydrogenase 1
LILKMKPI_00925	36.3869	5.33196	2.7707	6.82439	yjgH	0.00036486	0.00013891	TRUE	RutC family protein YjgH
LILKMKPI_00933	131.376	9.0347	3.8621	14.5415	--	1.1889e-18	1.0268e-18	TRUE	hypothetical protein
LILKMKPI_00955	232.11	12.2931	4.2389	18.8815	dauA_1	4.4469e-35	5.7424e-35	TRUE	C4-dicarboxylic acid transporter DauA
LILKMKPI_00956	243.984	9.33092	4.7086	26.1475	can_2	2.1664e-40	3.1027e-40	TRUE	Carbonic anhydrase 2
LILKMKPI_00963	4123.22	26.8079	7.265	153.809	lpxP	0	0	TRUE	Lipid A biosynthesis palmitoleoyltransferase
LILKMKPI_00964	882.479	17.477	5.658	50.4926	zapE_2	7.6084e-158	3.8917e-157	TRUE	Cell division protein ZapE
LILKMKPI_00997	2159.09	660.866	1.708	3.26708	--	2.3834e-48	3.9524e-48	TRUE	hypothetical protein
LILKMKPI_00998	481.457	35.3983	3.7657	13.6016	aroL	5.951e-62	1.2467e-61	TRUE	Shikimate kinase 2
LILKMKPI_01000	317.907	94.7903	1.7458	3.35381	--	5.9999e-09	3.3353e-09	TRUE	hypothetical protein
LILKMKPI_01008	242.452	27.2522	3.1533	8.89688	brnQ	4.6902e-25	4.8804e-25	TRUE	Branched-chain amino acid transport system 2 carrier protein
LILKMKPI_01009	181.935	27.6965	2.7156	6.56866	proY	5.5317e-15	4.1263e-15	TRUE	Proline-specific permease ProY
LILKMKPI_01014	170.444	47.5433	1.842	3.58507	queA	3.3858e-06	1.5515e-06	TRUE	S-adenosylmethionine:tRNA ribosyltransferase-isomerase
LILKMKPI_01015	459.242	76.5728	2.5843	5.99725	tgt	3.8838e-32	4.6993e-32	TRUE	Queuine tRNA-ribosyltransferase
LILKMKPI_01017	516.695	143.518	1.8481	3.60026	--	4.2363e-16	3.3237e-16	TRUE	hypothetical protein
LILKMKPI_01018	332.079	100.715	1.7213	3.29733	--	6.4737e-09	3.5962e-09	TRUE	hypothetical protein
LILKMKPI_01023	1086.25	155.96	2.8001	6.96489	ribE	3.3072e-86	9.3373e-86	TRUE	6%2C7-dimethyl-8-ribityllumazine synthase
LILKMKPI_01024	406.002	83.534	2.2811	4.86048	nusB	5.8924e-22	5.6742e-22	TRUE	N utilization substance protein B
LILKMKPI_01025	262.752	34.9539	2.9102	7.51722	thiL	1.0818e-23	1.0925e-23	TRUE	Thiamine-monophosphate kinase
LILKMKPI_01026	99.9684	10.0715	3.3112	9.92591	pgpA	5.0065e-12	3.2755e-12	TRUE	Phosphatidylglycerophosphatase A
LILKMKPI_01031	1455.48	98.1968	3.8897	14.8223	thiI	5.6937e-191	3.6463e-190	TRUE	tRNA sulfurtransferase
LILKMKPI_01046	1858.8	647.981	1.5203	2.86851	tig	1.3178e-27	1.4417e-27	TRUE	Trigger factor
LILKMKPI_01092	247.431	14.3667	4.1062	17.2222	rpmE2	4.3932e-36	5.816e-36	TRUE	50S ribosomal protein L31 type B
LILKMKPI_01093	1023.81	75.6841	3.7578	13.5273	ylaC	2.8391e-129	1.2635e-128	TRUE	Inner membrane protein YlaC
LILKMKPI_01094	191.127	54.9488	1.7984	3.47834	maa	2.1815e-06	1.0126e-06	TRUE	Maltose O-acetyltransferase
LILKMKPI_01105	636.963	197.579	1.6888	3.22388	dnaX	7.3735e-15	5.4898e-15	TRUE	DNA polymerase III subunit tau
LILKMKPI_01119	603.257	105.75	2.5121	5.7045	gsk	2.5241e-39	3.5825e-39	TRUE	Inosine-guanosine kinase
LILKMKPI_01120	305.65	105.899	1.5292	2.88626	ybaL	7.9781e-06	3.5207e-06	TRUE	Inner membrane protein YbaL
LILKMKPI_01194	44.8134	10.812	2.0513	4.14479	entF	0.0052809	0.0017762	TRUE	Enterobactin synthase component F
LILKMKPI_01198	178.488	27.1041	2.7192	6.58508	ybdL	9.1883e-15	6.8088e-15	TRUE	Methionine aminotransferase
LILKMKPI_01201	235.175	71.5371	1.717	3.28752	ahpF	1.1539e-06	5.4659e-07	TRUE	Alkyl hydroperoxide reductase subunit F
LILKMKPI_01203	426.302	96.1233	2.1489	4.4349	--	5.3968e-20	4.8253e-20	TRUE	--
LILKMKPI_01213	360.422	99.9742	1.8501	3.60525	rna	1.0276e-11	6.6565e-12	TRUE	Ribonuclease I
LILKMKPI_01215	365.785	111.379	1.7155	3.2841	pagP	1.3887e-09	8.0253e-10	TRUE	Lipid A palmitoyltransferase PagP
LILKMKPI_01216	20150.3	3821.83	2.3985	5.27255	cspE	0	0	TRUE	Cold shock-like protein CspE
LILKMKPI_01220	2151.43	287.185	2.9052	7.49122	lipA	7.4204e-181	4.4619e-180	TRUE	Lipoyl synthase
LILKMKPI_01222	383.404	95.3828	2.0071	4.01973	lipB	2.4556e-15	1.8599e-15	TRUE	Octanoyltransferase
LILKMKPI_01224	1810.92	244.085	2.8913	7.41939	dacA	3.3301e-151	1.6602e-150	TRUE	D-alanyl-D-alanine carboxypeptidase DacA
LILKMKPI_01226	125.248	30.5106	2.0374	4.10505	mrdB	3.8402e-06	1.7495e-06	TRUE	Peptidoglycan glycosyltransferase MrdB
LILKMKPI_01227	430.515	34.0653	3.6597	12.638	mrdA	1.3419e-53	2.464e-53	TRUE	Peptidoglycan D%2CD-transpeptidase MrdA
LILKMKPI_01228	196.107	16.8845	3.5379	11.6149	rlmH	2.9625e-24	3.0307e-24	TRUE	Ribosomal RNA large subunit methyltransferase H
LILKMKPI_01229	380.722	46.0622	3.0471	8.26549	rsfS	2.5627e-36	3.4041e-36	TRUE	Ribosomal silencing factor RsfS
LILKMKPI_01243	487.968	177.88	1.4559	2.74328	miaB	3.6882e-07	1.8135e-07	TRUE	tRNA-2-methylthio-N(6)-dimethylallyladenosine synthase
LILKMKPI_01253	562.274	70.7965	2.9895	7.94199	asnB	4.01e-51	7.0038e-51	TRUE	Asparagine synthetase B [glutamine-hydrolyzing]
LILKMKPI_01260	582.957	229.867	1.3426	2.53608	glnS	4.621e-06	2.0836e-06	TRUE	Glutamine--tRNA ligase
LILKMKPI_01264	975.17	372.496	1.3884	2.61788	fur	1.1703e-10	7.1515e-11	TRUE	Ferric uptake regulation protein
LILKMKPI_01277	1994	422.706	2.2379	4.7171	--	1.2963e-96	4.0202e-96	TRUE	hypothetical protein
LILKMKPI_01305	262.752	45.3216	2.5354	5.79738	ybgC	2.2222e-18	1.8965e-18	TRUE	Acyl-CoA thioester hydrolase YbgC
LILKMKPI_01306	235.558	46.0622	2.3544	5.11382	exbB_1	2.5656e-14	1.8609e-14	TRUE	Biopolymer transport protein ExbB
LILKMKPI_01307	60.9003	10.812	2.4938	5.6326	exbD_1	3.5498e-05	1.485e-05	TRUE	Biopolymer transport protein ExbD
LILKMKPI_01308	569.168	106.639	2.4161	5.33726	--	3.0066e-34	3.8261e-34	TRUE	hypothetical protein
LILKMKPI_01309	300.288	127.967	1.2306	2.34665	dpp5	0.010281	0.0033422	TRUE	Dipeptidyl-peptidase 5
LILKMKPI_01317	203.001	49.0244	2.0499	4.14077	nadA	3.0007e-09	1.7017e-09	TRUE	Quinolinate synthase A
LILKMKPI_01319	242.069	65.0202	1.8965	3.72309	zitB	7.0172e-09	3.8871e-09	TRUE	Zinc transporter ZitB
LILKMKPI_01320	15800.7	6772.47	1.2222	2.33302	--	6.8512e-75	1.676e-74	TRUE	hypothetical protein
LILKMKPI_01329	617.812	155.515	1.9901	3.97265	acrZ	3.1134e-23	3.1162e-23	TRUE	Multidrug efflux pump accessory protein AcrZ
LILKMKPI_01330	164.699	45.4697	1.8569	3.62228	modA	3.7554e-06	1.7119e-06	TRUE	Molybdate-binding periplasmic protein
LILKMKPI_01338	70.4758	6.81305	3.3708	10.3446	bioA	4.1493e-09	2.3313e-09	TRUE	Adenosylmethionine-8-amino-7-oxononanoate aminotransferase
LILKMKPI_01344	1380.02	581.924	1.2458	2.3715	uvrB_1	1.0833e-08	5.9181e-09	TRUE	UvrABC system protein B
LILKMKPI_01346	251.261	73.6106	1.7712	3.41338	moaA	1.1777e-07	5.966e-08	TRUE	GTP 3'%2C8-cyclase
LILKMKPI_01347	37.919	7.10927	2.4151	5.33356	moaB	0.0016447	0.00058384	TRUE	Molybdenum cofactor biosynthesis protein B
LILKMKPI_01362	4675.53	72.1295	6.0184	64.8215	rhlE	0	0	TRUE	ATP-dependent RNA helicase RhlE
LILKMKPI_01367	415.96	110.934	1.9067	3.7495	dinG_1	1.9649e-14	1.4291e-14	TRUE	putative ATP-dependent helicase DinG
LILKMKPI_01374	706.29	37.4718	4.2364	18.8488	bhsA_3	5.2317e-103	1.7611e-102	TRUE	Multiple stress resistance protein BhsA
LILKMKPI_01377	81.9664	19.4024	2.0788	4.22456	rlmF	0.00012225	4.8783e-05	TRUE	Ribosomal RNA large subunit methyltransferase F
LILKMKPI_01382	36975.3	7698.75	2.2639	4.80288	dps	0	0	TRUE	DNA protection during starvation protein
LILKMKPI_01392	323.269	102.196	1.6614	3.16323	ybiS	7.372e-08	3.7929e-08	TRUE	putative L%2CD-transpeptidase YbiS
LILKMKPI_01393	1926.21	201.133	3.2595	9.57651	ybiT	4.7842e-197	3.221e-196	TRUE	putative ABC transporter ATP-binding protein YbiT
LILKMKPI_01395	87.7117	25.3268	1.7921	3.46319	--	0.0014225	0.00050862	TRUE	--
LILKMKPI_01399	332.079	129.744	1.3559	2.55957	moeA	0.00039222	0.00014889	TRUE	Molybdopterin molybdenumtransferase
LILKMKPI_01404	291.479	73.9068	1.9796	3.94384	rimO_2	1.3052e-11	8.3724e-12	TRUE	Ribosomal protein S12 methylthiotransferase RimO
LILKMKPI_01410	36.0039	6.51683	2.4659	5.52471	--	0.0016893	0.00059886	TRUE	hypothetical protein
LILKMKPI_01417	394.894	97.6044	2.0164	4.04573	aspT	6.1422e-16	4.7809e-16	TRUE	Aspartate/alanine antiporter
LILKMKPI_01419	127.929	28.1409	2.1846	4.54601	nfsA	3.01e-07	1.4884e-07	TRUE	Oxygen-insensitive NADPH nitroreductase
LILKMKPI_01421	171.21	56.4299	1.6012	3.03396	--	0.00025357	9.8344e-05	TRUE	hypothetical protein
LILKMKPI_01427	147.846	31.8436	2.215	4.64282	rlmC	2.0885e-08	1.1206e-08	TRUE	23S rRNA (uracil(747)-C(5))-methyltransferase RlmC
LILKMKPI_01444	126.78	36.435	1.7989	3.47955	hcp	0.00011388	4.5511e-05	TRUE	Hydroxylamine reductase
LILKMKPI_01453	1441.69	313.4	2.2017	4.60021	infA	1.3055e-67	2.9214e-67	TRUE	Translation initiation factor IF-1
LILKMKPI_01460	263.135	84.4226	1.6401	3.11687	lolA	2.1044e-06	9.7854e-07	TRUE	Outer-membrane lipoprotein carrier protein
LILKMKPI_01461	332.079	102.344	1.6981	3.24473	rarA	1.4293e-08	7.7538e-09	TRUE	Replication-associated recombination protein A
LILKMKPI_01467	237.856	70.7965	1.7483	3.35962	ycaO	4.569e-07	2.234e-07	TRUE	Ribosomal protein S12 methylthiotransferase accessory factor YcaO
LILKMKPI_01471	534.314	145.74	1.8743	3.66624	cmk	2.8859e-17	2.3704e-17	TRUE	Cytidylate kinase
LILKMKPI_01472	4895.39	1682.53	1.5408	2.90956	rpsA_1	8.6024e-74	2.0722e-73	TRUE	30S ribosomal protein S1
LILKMKPI_01474	134.44	41.9151	1.6814	3.20739	comEC	0.00039201	0.00014888	TRUE	ComE operon protein 3
LILKMKPI_01489	673.733	136.705	2.3011	4.92833	--	4.5176e-36	5.9607e-36	TRUE	hypothetical protein
LILKMKPI_01490	540.059	111.823	2.2719	4.82959	gloC	2.0888e-28	2.3141e-28	TRUE	Hydroxyacylglutathione hydrolase GloC
LILKMKPI_01510	317.907	109.898	1.5324	2.89267	lon_2	4.7821e-06	2.1525e-06	TRUE	Lon protease
LILKMKPI_01513	133.674	35.2502	1.923	3.79211	sulA	1.1159e-05	4.8646e-06	TRUE	Cell division inhibitor SulA
LILKMKPI_01520	1028.03	463.288	1.1499	2.21899	hspQ	0.00017414	6.855e-05	TRUE	Heat shock protein HspQ
LILKMKPI_01521	242.452	33.1766	2.8695	7.30812	rlmI	1.844e-21	1.7437e-21	TRUE	Ribosomal RNA large subunit methyltransferase I
LILKMKPI_01524	2585.01	731.218	1.8218	3.53522	yccA	8.0567e-71	1.8503e-70	TRUE	Modulator of FtsH protease YccA
LILKMKPI_01527	37.919	5.62818	2.7522	6.73744	--	0.00030059	0.00011564	TRUE	hypothetical protein
LILKMKPI_01532	504.821	177.732	1.5061	2.84041	--	2.6672e-08	1.4215e-08	TRUE	hypothetical protein
LILKMKPI_01534	161524	23999.3	2.7507	6.73044	--	0	0	TRUE	hypothetical protein
LILKMKPI_01535	44.4304	9.0347	2.298	4.91776	rutG	0.0013065	0.00046992	TRUE	Putative pyrimidine permease RutG
LILKMKPI_01553	1518.29	513.201	1.5649	2.95857	--	1.8782e-25	1.9674e-25	TRUE	--
LILKMKPI_01566	200.32	58.5034	1.7757	3.42404	mdoC	2.041e-06	9.5018e-07	TRUE	Glucans biosynthesis protein C
LILKMKPI_01574	32.9398	7.40549	2.1532	4.44813	yceJ	0.010731	0.0034784	TRUE	Cytochrome b561
LILKMKPI_01577	128.312	11.7007	3.455	10.9663	dinI_1	6.5121e-16	5.0588e-16	TRUE	DNA damage-inducible protein I
LILKMKPI_01578	356.209	50.6536	2.814	7.03232	pyrC	1.0356e-29	1.1755e-29	TRUE	Dihydroorotase
LILKMKPI_01579	289.947	97.4563	1.573	2.97523	yceB	4.2051e-06	1.9037e-06	TRUE	putative lipoprotein YceB
LILKMKPI_01580	4544.16	1299.96	1.8055	3.4955	grxB_1	9.4367e-120	3.8316e-119	TRUE	Glutaredoxin 2
LILKMKPI_01606	2440.61	718.333	1.7645	3.39756	yceD	1.4817e-60	3.0238e-60	TRUE	Large ribosomal RNA subunit accumulation protein YceD
LILKMKPI_01608	823.111	178.472	2.2054	4.61202	plsX	1.6217e-39	2.31e-39	TRUE	Phosphate acyltransferase
LILKMKPI_01609	502.906	149.887	1.7464	3.3552	fabH_1	2.4662e-13	1.7161e-13	TRUE	3-oxoacyl-[acyl-carrier-protein] synthase 3
LILKMKPI_01627	1041.05	33.9172	4.9399	30.6943	ndh	1.9126e-172	1.0838e-171	TRUE	NADH dehydrogenase
LILKMKPI_01628	610.535	110.046	2.472	5.54812	--	1.8736e-38	2.6075e-38	TRUE	hypothetical protein
LILKMKPI_01630	381.488	46.8027	3.027	8.15113	bhsA_4	5.4588e-36	7.1905e-36	TRUE	Multiple stress resistance protein BhsA
LILKMKPI_01638	92.691	22.6608	2.0322	4.09028	potD	7.4857e-05	3.0505e-05	TRUE	Spermidine/putrescine-binding periplasmic protein
LILKMKPI_01641	93.074	31.9917	1.5407	2.90936	potA_2	0.012358	0.0039634	TRUE	Spermidine/putrescine import ATP-binding protein PotA
LILKMKPI_01646	173.508	64.724	1.4226	2.68068	purB	0.0040082	0.0013692	TRUE	Adenylosuccinate lyase
LILKMKPI_01647	211.044	42.2113	2.3218	4.99956	hflD	1.3084e-12	8.8015e-13	TRUE	High frequency lysogenization protein HflD
LILKMKPI_01648	939.549	166.031	2.5005	5.65882	mnmA	1.1188e-59	2.231e-59	TRUE	tRNA-specific 2-thiouridylase MnmA
LILKMKPI_01656	83.4985	21.0316	1.9892	3.97017	--	0.000265	0.00010258	TRUE	hypothetical protein
LILKMKPI_01657	309.098	5.18385	5.8979	59.6273	trg_3	2.5493e-57	4.946e-57	TRUE	Methyl-accepting chemotaxis protein III
LILKMKPI_01658	46.7285	9.77525	2.2571	4.7803	--	0.0012582	0.00045319	TRUE	hypothetical protein
LILKMKPI_01659	682.16	293.109	1.2187	2.32737	--	0.00017673	6.9396e-05	TRUE	hypothetical protein
LILKMKPI_01660	34903.1	737.143	5.5653	47.3502	cspB	0	0	TRUE	Cold shock-like protein CspB
LILKMKPI_01662	434.728	33.4728	3.6991	12.9879	--	7.3449e-55	1.3808e-54	TRUE	hypothetical protein
LILKMKPI_01696	748.805	98.0487	2.933	7.63697	spy	2.8603e-65	6.2586e-65	TRUE	Periplasmic chaperone Spy
LILKMKPI_01697	291.096	18.5137	3.9748	15.7229	ves	1.1375e-40	1.6322e-40	TRUE	Protein Ves
LILKMKPI_01698	596.746	113.896	2.3894	5.23939	cho	5.7491e-35	7.3997e-35	TRUE	Excinuclease cho
LILKMKPI_01703	217.939	82.4972	1.4015	2.64176	cedA	0.0018442	0.00065105	TRUE	Cell division activator CedA
LILKMKPI_01704	336.675	21.4759	3.9706	15.6772	tcyP	1.0439e-46	1.6885e-46	TRUE	L-cystine uptake protein TcyP
LILKMKPI_01713	805.875	115.822	2.7986	6.95765	--	2.2752e-64	4.8702e-64	TRUE	hypothetical protein
LILKMKPI_01717	577.595	238.161	1.2781	2.42519	--	6.6314e-05	2.7136e-05	TRUE	hypothetical protein
LILKMKPI_01720	77.3701	24.5862	1.6539	3.14683	--	0.009017	0.0029595	TRUE	hypothetical protein
LILKMKPI_01736	1008.88	247.343	2.0282	4.07896	--	8.0297e-39	1.1215e-38	TRUE	hypothetical protein
LILKMKPI_01746	502.906	140.112	1.8437	3.58929	iscA_1	1.3195e-15	1.013e-15	TRUE	Iron-binding protein IscA
LILKMKPI_01747	1727.81	390.27	2.1464	4.42722	sufB	1.091e-75	2.6855e-75	TRUE	FeS cluster assembly protein SufB
LILKMKPI_01748	391.447	144.555	1.4372	2.70795	sufC	9.6865e-06	4.246e-06	TRUE	putative ATP-dependent transporter SufC
LILKMKPI_01749	982.831	263.932	1.8968	3.72386	sufD	1.7523e-31	2.0819e-31	TRUE	FeS cluster assembly protein SufD
LILKMKPI_01750	721.611	255.341	1.4988	2.82608	sufS	4.6067e-11	2.8772e-11	TRUE	Cysteine desulfurase
LILKMKPI_01788	122.184	29.622	2.0443	4.12473	--	4.5534e-06	2.0554e-06	TRUE	hypothetical protein
LILKMKPI_01795	200.703	64.8721	1.6294	3.09384	betI_1	4.2641e-05	1.7689e-05	TRUE	HTH-type transcriptional regulator BetI
LILKMKPI_01807	484.521	169.29	1.5171	2.86215	mdtK	3.1685e-08	1.6807e-08	TRUE	Multidrug resistance protein MdtK
LILKMKPI_01813	205.682	41.1745	2.3206	4.9954	ydhC	2.5926e-12	1.7263e-12	TRUE	Inner membrane transport protein YdhC
LILKMKPI_01815	168.529	43.1	1.9672	3.91009	purR	3.3968e-07	1.6765e-07	TRUE	HTH-type transcriptional repressor PurR
LILKMKPI_01816	78.5192	20.1429	1.9628	3.89818	--	0.00052119	0.00019606	TRUE	hypothetical protein
LILKMKPI_01817	165.848	57.0223	1.5403	2.90855	ydhP	0.00084444	0.0003101	TRUE	Inner membrane transport protein YdhP
LILKMKPI_01822	99.9684	14.9591	2.7404	6.68256	nemA_1	5.0734e-09	2.8303e-09	TRUE	N-ethylmaleimide reductase
LILKMKPI_01823	230.578	83.3859	1.4674	2.76523	nemR	0.00037702	0.0001434	TRUE	HTH-type transcriptional repressor NemR
LILKMKPI_01843	73.1569	11.4045	2.6814	6.41478	rsxD	9.9678e-07	4.75e-07	TRUE	Electron transport complex subunit RsxD
LILKMKPI_01844	185.382	30.6587	2.5961	6.0465	rsxC	4.9608e-14	3.5589e-14	TRUE	Electron transport complex subunit RsxC
LILKMKPI_01845	56.687	7.40549	2.9364	7.65499	rsxB_1	2.6187e-06	1.207e-06	TRUE	Electron transport complex subunit RsxB
LILKMKPI_01846	193.425	40.7302	2.2476	4.74892	rsxA	6.6528e-11	4.1264e-11	TRUE	Electron transport complex subunit RsxA
LILKMKPI_01847	181.552	43.8405	2.05	4.14106	ydgK	2.0244e-08	1.0885e-08	TRUE	Inner membrane protein YdgK
LILKMKPI_01870	2250.63	730.774	1.6228	3.07972	fnr	3.4463e-42	5.1123e-42	TRUE	Fumarate and nitrate reduction regulatory protein
LILKMKPI_01882	15.3208	1.33299	3.5228	11.4939	yicJ_4	0.0046353	0.0015745	TRUE	Inner membrane symporter YicJ
LILKMKPI_01883	31.0247	4.88763	2.6662	6.34755	emrE_1	0.001537	0.0005481	TRUE	Multidrug transporter EmrE
LILKMKPI_01884	104.182	13.1818	2.9825	7.90355	kstR2	1.0478e-10	6.423e-11	TRUE	HTH-type transcriptional repressor KstR2
LILKMKPI_01934	41.7492	3.99897	3.3841	10.4404	orfC	5.6862e-06	2.5449e-06	TRUE	Antigen Lp49
LILKMKPI_01950	2244.5	328.952	2.7704	6.82297	fabG_2	1.4906e-172	8.5087e-172	TRUE	3-oxoacyl-[acyl-carrier-protein] reductase
LILKMKPI_01958	121.418	21.1797	2.5192	5.73264	--	3.5556e-09	2.0077e-09	TRUE	hypothetical protein
LILKMKPI_01982	1517.14	400.341	1.9221	3.78974	treF	1.5724e-49	2.6752e-49	TRUE	Cytoplasmic trehalase
LILKMKPI_01988	80.8173	16.7364	2.2717	4.82892	adrA	1.9088e-05	8.1408e-06	TRUE	putative diguanylate cyclase AdrA
LILKMKPI_01989	207.597	55.5412	1.9022	3.73783	ycdT	7.1788e-08	3.696e-08	TRUE	putative diguanylate cyclase YcdT
LILKMKPI_01998	442.389	21.4759	4.3645	20.599	sotB	3.6536e-67	8.1299e-67	TRUE	Sugar efflux transporter
LILKMKPI_01999	224.067	14.5148	3.9483	15.4368	marR	1.8404e-31	2.1833e-31	TRUE	Multiple antibiotic resistance protein MarR
LILKMKPI_02000	70.0928	8.73848	3.0038	8.0211	marA_1	9.7004e-08	4.9457e-08	TRUE	Multiple antibiotic resistance protein MarA
LILKMKPI_02001	49.7927	4.29519	3.5351	11.5923	--	3.1029e-07	1.5334e-07	TRUE	hypothetical protein
LILKMKPI_02017	427.451	5.03574	6.4074	84.8828	bluR_1	8.0689e-80	2.1187e-79	TRUE	HTH-type transcriptional repressor BluR
LILKMKPI_02018	29.8756	0	6.6562	100.859	--	5.5766e-07	2.7116e-07	TRUE	hypothetical protein
LILKMKPI_02044	348.166	77.6096	2.1655	4.48622	ynfM	6.4468e-17	5.1872e-17	TRUE	Inner membrane transport protein YnfM
LILKMKPI_02052	147.463	40.1378	1.8773	3.67387	ydcP_1	8.5763e-06	3.772e-06	TRUE	putative protease YdcP
LILKMKPI_02060	342.037	88.4216	1.9517	3.8683	mdoD	6.8357e-13	4.6539e-13	TRUE	Glucans biosynthesis protein D
LILKMKPI_02065	15607.7	5748.14	1.4411	2.71528	--	2.0494e-175	1.187e-174	TRUE	hypothetical protein
LILKMKPI_02066	111.076	33.7691	1.7178	3.28934	trg_5	0.00082302	0.00030309	TRUE	Methyl-accepting chemotaxis protein III
LILKMKPI_02068	45.1964	9.18281	2.2992	4.92185	frmR_1	0.0011779	0.00042579	TRUE	Transcriptional repressor FrmR
LILKMKPI_02076	386.468	45.9141	3.0733	8.41696	--	2.302e-37	3.1372e-37	TRUE	hypothetical protein
LILKMKPI_02098	203.767	56.2818	1.8562	3.62053	adhT	2.7331e-07	1.3574e-07	TRUE	Alcohol dehydrogenase
LILKMKPI_02099	184.233	50.2092	1.8755	3.66929	ald1	6.8012e-07	3.2787e-07	TRUE	Long-chain-aldehyde dehydrogenase
LILKMKPI_02112	24399.6	4636.73	2.3957	5.26232	--	0	0	TRUE	hypothetical protein
LILKMKPI_02116	139.036	31.6955	2.1331	4.38659	--	2.2399e-07	1.1202e-07	TRUE	hypothetical protein
LILKMKPI_02158	84.2645	4.88763	4.1077	17.2401	--	2.4697e-13	1.717e-13	TRUE	hypothetical protein
LILKMKPI_02162	111.842	33.7691	1.7277	3.31199	--	0.00069985	0.00025967	TRUE	hypothetical protein
LILKMKPI_02167	23.7473	1.92543	3.6245	12.3334	--	0.00032318	0.00012384	TRUE	hypothetical protein
LILKMKPI_02181	26.0454	4.29519	2.6002	6.06371	--	0.0046818	0.0015882	TRUE	hypothetical protein
LILKMKPI_02182	68.9437	13.9223	2.308	4.95196	gtfA	5.6895e-05	2.3379e-05	TRUE	Sucrose phosphorylase
LILKMKPI_02183	512.481	219.055	1.2262	2.3395	pspD	0.00091575	0.00033473	TRUE	Phage shock protein D
LILKMKPI_02184	462.689	7.84982	5.8812	58.941	pspC	8.2157e-85	2.2868e-84	TRUE	Phage shock protein C
LILKMKPI_02185	262.369	2.07354	6.9834	126.536	pspB_1	1.3116e-49	2.2362e-49	TRUE	Phage shock protein B
LILKMKPI_02186	3486.25	100.863	5.1112	34.564	pspA	0	0	TRUE	Phage shock protein A
LILKMKPI_02194	125.248	4.59141	4.7697	27.2786	--	9.5056e-22	9.054e-22	TRUE	hypothetical protein
LILKMKPI_02195	659.561	133.891	2.3004	4.92594	rnb	2.5191e-35	3.2744e-35	TRUE	Exoribonuclease 2
LILKMKPI_02210	10503.2	2377.02	2.1436	4.41863	acnA	0	0	TRUE	Aconitate hydratase A
LILKMKPI_02214	1042.96	274.151	1.9276	3.80422	topA_1	7.1987e-35	9.2202e-35	TRUE	DNA topoisomerase 1
LILKMKPI_02219	1079.35	308.513	1.8068	3.49865	rluB	8.1646e-30	9.3207e-30	TRUE	Ribosomal large subunit pseudouridine synthase B
LILKMKPI_02227	795.151	114.489	2.796	6.94512	--	1.9996e-63	4.2456e-63	TRUE	hypothetical protein
LILKMKPI_02230	426.685	77.3134	2.4644	5.51897	--	3.3275e-27	3.6103e-27	TRUE	hypothetical protein
LILKMKPI_02231	176.955	53.1714	1.7347	3.3281	yciB	1.7627e-05	7.546e-06	TRUE	putative intracellular septation protein A
LILKMKPI_02234	221.769	49.1725	2.1731	4.50991	--	2.088e-11	1.3275e-11	TRUE	hypothetical protein
LILKMKPI_02266	632.75	248.084	1.3508	2.55054	eae_1	1.2461e-06	5.8883e-07	TRUE	Intimin
LILKMKPI_02279	2484.27	107.232	4.534	23.167	chaA	0	0	TRUE	Sodium-potassium/proton antiporter ChaA
LILKMKPI_02283	129.078	19.5505	2.723	6.60244	prmC	4.1254e-11	2.5852e-11	TRUE	Release factor glutamine methyltransferase
LILKMKPI_02284	402.172	115.822	1.7959	3.47232	prfA	7.1366e-12	4.6536e-12	TRUE	Peptide chain release factor RF1
LILKMKPI_02285	1636.65	420.632	1.9601	3.89089	hemA	2.4219e-56	4.6192e-56	TRUE	Glutamyl-tRNA reductase
LILKMKPI_02290	834.602	63.0948	3.7255	13.2278	nolA_2	1.4077e-104	4.8211e-104	TRUE	Nodulation protein NolA
LILKMKPI_02293	1141.02	222.757	2.3568	5.12233	ychF	2.8624e-63	6.0448e-63	TRUE	Ribosome-binding ATPase YchF
LILKMKPI_02294	184.616	17.9213	3.3648	10.3016	--	2.0766e-21	1.952e-21	TRUE	hypothetical protein
LILKMKPI_02296	220.237	44.8773	2.295	4.90754	betI_2	8.9394e-13	6.0547e-13	TRUE	HTH-type transcriptional regulator BetI
LILKMKPI_02297	62.0493	7.5536	3.0382	8.21466	kefF_2	4.0347e-07	1.9777e-07	TRUE	Glutathione-regulated potassium-efflux system ancillary protein KefF
LILKMKPI_02298	3793.44	74.3512	5.673	51.0203	--	0	0	TRUE	hypothetical protein
LILKMKPI_02318	142.101	29.0295	2.2913	4.89497	--	1.0116e-08	5.545e-09	TRUE	hypothetical protein
LILKMKPI_02324	155.889	50.0611	1.6388	3.11407	rnd	0.0002672	0.00010333	TRUE	Ribonuclease D
LILKMKPI_02326	458.476	66.9457	2.7758	6.84856	slp	8.0744e-37	1.0835e-36	TRUE	Outer membrane protein slp
LILKMKPI_02327	584.489	55.8374	3.3879	10.4679	tsaB	9.0082e-65	1.9441e-64	TRUE	tRNA threonylcarbamoyladenosine biosynthesis protein TsaB
LILKMKPI_02328	237.09	76.5728	1.6305	3.0962	dinG_2	8.4272e-06	3.7147e-06	TRUE	putative ATP-dependent helicase DinG
LILKMKPI_02339	185.765	21.9203	3.0831	8.47433	pabB	6.6901e-19	5.8424e-19	TRUE	Aminodeoxychorismate synthase component 1
LILKMKPI_02349	74.689	15.5515	2.2638	4.80255	rlmA	4.2645e-05	1.7689e-05	TRUE	23S rRNA (guanine(745)-N(1))-methyltransferase
LILKMKPI_02354	73.1569	19.4024	1.9148	3.77062	--	0.0012407	0.00044707	TRUE	hypothetical protein
LILKMKPI_02356	1316.44	337.839	1.9622	3.89656	htpX_1	8.4541e-46	1.3453e-45	TRUE	Protease HtpX
LILKMKPI_02362	235.558	74.3512	1.6637	3.16828	rsmF	4.1215e-06	1.869e-06	TRUE	Ribosomal RNA small subunit methyltransferase F
LILKMKPI_02375	1783.73	301.107	2.5665	5.92371	ptrB	5.4533e-118	2.1695e-117	TRUE	Protease 2
LILKMKPI_02376	3638.69	311.031	3.5483	11.6989	yebE	0	0	TRUE	Inner membrane protein YebE
LILKMKPI_02378	959.466	61.9099	3.954	15.4979	--	4.6937e-129	2.0771e-128	TRUE	hypothetical protein
LILKMKPI_02379	88.8608	30.3625	1.5493	2.92675	purT	0.013442	0.0042904	TRUE	Formate-dependent phosphoribosylglycinamide formyltransferase
LILKMKPI_02386	856.434	227.941	1.9097	3.75731	mepM	3.5058e-28	3.8677e-28	TRUE	Murein DD-endopeptidase MepM
LILKMKPI_02387	462.306	125.005	1.8869	3.6984	znuA	1.9978e-15	1.5219e-15	TRUE	High-affinity zinc uptake system protein ZnuA
LILKMKPI_02388	931.889	65.7608	3.8249	14.1713	znuC	1.7353e-120	7.1566e-120	TRUE	Zinc import ATP-binding protein ZnuC
LILKMKPI_02389	254.709	18.81	3.7593	13.5414	znuB	1.5721e-33	1.9688e-33	TRUE	High-affinity zinc uptake system membrane protein ZnuB
LILKMKPI_02403	373.445	68.4268	2.4483	5.45773	hscC_2	1.0947e-23	1.1027e-23	TRUE	Chaperone protein HscC
LILKMKPI_02404	4847.12	231.496	4.3881	20.9387	cutC_2	0	0	TRUE	Copper homeostasis protein CutC
LILKMKPI_02434	2572.75	675.529	1.9292	3.80844	otsA	1.1745e-83	3.2461e-83	TRUE	Trehalose-6-phosphate synthase
LILKMKPI_02435	1178.94	483.727	1.2852	2.43716	otsB	6.994e-09	3.8778e-09	TRUE	Trehalose-6-phosphate phosphatase
LILKMKPI_02439	479.159	206.465	1.2146	2.32076	--	0.0018779	0.00066127	TRUE	hypothetical protein
LILKMKPI_02444	88.8608	14.811	2.5849	5.99974	--	2.0861e-07	1.0446e-07	TRUE	hypothetical protein
LILKMKPI_02450	60.9003	12.4412	2.2913	4.89497	tyrP_1	0.00017663	6.9391e-05	TRUE	Tyrosine-specific transport protein
LILKMKPI_02457	694.416	272.226	1.351	2.55089	uvrY	3.758e-07	1.8455e-07	TRUE	Response regulator UvrY
LILKMKPI_02458	354.294	32.4361	3.4493	10.923	--	5.3258e-41	7.7117e-41	TRUE	hypothetical protein
LILKMKPI_02459	464.604	99.5298	2.2228	4.66799	sdiA	1.8708e-23	1.8773e-23	TRUE	Regulatory protein SdiA
LILKMKPI_02512	196.873	39.8416	2.3049	4.94133	dsrB	1.1106e-11	7.1766e-12	TRUE	Protein DsrB
LILKMKPI_02516	1246.73	345.392	1.8518	3.6095	--	8.2611e-37	1.1067e-36	TRUE	hypothetical protein
LILKMKPI_02520	750.337	299.182	1.3265	2.50794	dcm_1	4.7308e-07	2.3117e-07	TRUE	DNA-cytosine methyltransferase
LILKMKPI_02523	372.296	18.6618	4.3183	19.9498	dinI_2	3.1167e-56	5.93e-56	TRUE	DNA damage-inducible protein I
LILKMKPI_02539	18.002	2.66598	2.7554	6.7524	vgrG1_5	0.012648	0.0040517	TRUE	Actin cross-linking toxin VgrG1
LILKMKPI_02548	440.474	72.4257	2.6045	6.08181	plaP	2.2595e-31	2.6764e-31	TRUE	Low-affinity putrescine importer PlaP
LILKMKPI_02553	207.597	48.1357	2.1086	4.31273	hisG	4.614e-10	2.7347e-10	TRUE	ATP phosphoribosyltransferase
LILKMKPI_02554	137.504	35.3983	1.9577	3.88442	hisD	4.7747e-06	2.1504e-06	TRUE	Histidinol dehydrogenase
LILKMKPI_02583	34.4718	2.66598	3.6927	12.9304	gmm	1.147e-05	4.9889e-06	TRUE	GDP-mannose mannosyl hydrolase
LILKMKPI_02584	44.4304	7.10927	2.6438	6.24976	fcl	0.00017124	6.7512e-05	TRUE	GDP-L-fucose synthase
LILKMKPI_02585	62.8154	9.0347	2.7976	6.95283	gmd	2.2776e-06	1.0541e-06	TRUE	GDP-mannose 4%2C6-dehydratase
LILKMKPI_02586	22.9812	1.62921	3.8182	14.1056	--	0.0002514	9.7627e-05	TRUE	--
LILKMKPI_02587	64.7305	4.59141	3.8174	14.0978	--	8.0879e-10	4.7367e-10	TRUE	--
LILKMKPI_02588	52.0908	11.1082	2.2294	4.68939	--	0.00079743	0.00029435	TRUE	hypothetical protein
LILKMKPI_02601	167.38	43.5443	1.9426	3.84398	dnaK_2	6.0339e-07	2.9249e-07	TRUE	Chaperone protein DnaK
LILKMKPI_02611	240.92	70.3522	1.7759	3.42452	ydcP_2	1.8954e-07	9.5096e-08	TRUE	putative protease YdcP
LILKMKPI_02614	36.0039	5.62818	2.6774	6.39702	thiD	0.00061051	0.00022781	TRUE	Hydroxymethylpyrimidine/phosphomethylpyrimidine kinase
LILKMKPI_02615	71.2418	12.7374	2.4836	5.59291	thiM	8.4975e-06	3.7415e-06	TRUE	Hydroxyethylthiazole kinase
LILKMKPI_02633	813.153	186.47	2.1246	4.36082	metG	1.2486e-35	1.6284e-35	TRUE	Methionine--tRNA ligase
LILKMKPI_02644	725.824	205.28	1.822	3.53571	yohC	4.2859e-21	3.9859e-21	TRUE	Inner membrane protein YohC
LILKMKPI_02645	110.693	37.9161	1.5457	2.91946	yohD	0.0060304	0.0020179	TRUE	Inner membrane protein YohD
LILKMKPI_02646	337.058	143.518	1.2318	2.3486	ycdF	0.0063893	0.0021326	TRUE	Glucose 1-dehydrogenase 2
LILKMKPI_02661	70.4758	17.6251	1.9995	3.99861	--	0.00073679	0.00027248	TRUE	hypothetical protein
LILKMKPI_02662	215.258	63.6872	1.757	3.37995	folE	1.3135e-06	6.1954e-07	TRUE	GTP cyclohydrolase 1
LILKMKPI_02673	68.9437	10.5158	2.7129	6.55638	setB	1.5453e-06	7.2539e-07	TRUE	Sugar efflux transporter B
LILKMKPI_02681	133.674	40.1378	1.7357	3.33041	lpxT	0.00018776	7.362e-05	TRUE	Lipid A 1-diphosphate synthase
LILKMKPI_02682	6943.01	1060.47	2.7109	6.5473	mepS_3	0	0	TRUE	Murein DD-endopeptidase MepS/Murein LD-carboxypeptidase
LILKMKPI_02683	335.143	143.518	1.2235	2.33513	adrB_2	0.007763	0.0025671	TRUE	Putative cyclic-di-GMP phosphodiesterase AdrB
LILKMKPI_02688	61.2833	5.33196	3.5228	11.4939	--	1.4899e-08	8.0606e-09	TRUE	hypothetical protein
LILKMKPI_02692	3054.59	711.076	2.1029	4.29572	rplY	1.4702e-125	6.1932e-125	TRUE	50S ribosomal protein L25
LILKMKPI_02695	463.072	185.582	1.3192	2.49528	yejM	9.6713e-05	3.8967e-05	TRUE	Inner membrane protein YejM
LILKMKPI_02706	460.774	57.1704	3.0107	8.05955	dauA_3	1.012e-42	1.5272e-42	TRUE	C4-dicarboxylic acid transporter DauA
LILKMKPI_02707	160.103	41.0264	1.9644	3.9025	yojI	7.0357e-07	3.3835e-07	TRUE	ABC transporter ATP-binding/permease protein YojI
LILKMKPI_02715	3530.3	648.277	2.4451	5.44563	gyrA	1.2858e-208	8.8847e-208	TRUE	DNA gyrase subunit A
LILKMKPI_02717	347.017	119.821	1.5341	2.89608	nrdA	1.6709e-06	7.8299e-07	TRUE	Ribonucleoside-diphosphate reductase 1 subunit alpha
LILKMKPI_02761	164.699	37.4718	2.136	4.39542	--	1.6444e-08	8.8657e-09	TRUE	hypothetical protein
LILKMKPI_02762	56.304	15.9959	1.8155	3.51982	marA_2	0.009059	0.0029685	TRUE	Multiple antibiotic resistance protein MarA
LILKMKPI_02777	321.354	97.6044	1.7191	3.29231	purF	1.2152e-08	6.6154e-09	TRUE	Amidophosphoribosyltransferase
LILKMKPI_02778	554.614	66.7976	3.0536	8.30281	cvpA	2.6916e-52	4.8296e-52	TRUE	Colicin V production protein
LILKMKPI_02783	79.2852	22.3646	1.8258	3.54504	truA	0.0017783	0.00062873	TRUE	tRNA pseudouridine synthase A
LILKMKPI_02784	123.333	45.0254	1.4537	2.7391	usg	0.010849	0.0035124	TRUE	USG-1 protein
LILKMKPI_02785	392.596	139.964	1.488	2.805	pdxB	1.7403e-06	8.1499e-07	TRUE	Erythronate-4-phosphate dehydrogenase
LILKMKPI_02797	1273.93	403.599	1.6583	3.15644	sixA	1.7336e-26	1.8579e-26	TRUE	Phosphohistidine phosphatase SixA
LILKMKPI_02811	98.0533	32.1398	1.6092	3.05083	ccmA	0.0051934	0.0017505	TRUE	Cytochrome c biogenesis ATP-binding export protein CcmA
LILKMKPI_02865	102.266	29.0295	1.8167	3.52274	cysM	0.00042986	0.00016279	TRUE	Cysteine synthase B
LILKMKPI_02866	227.514	10.0715	4.4976	22.5898	cysA_2	2.2513e-36	2.9955e-36	TRUE	Sulfate/thiosulfate import ATP-binding protein CysA
LILKMKPI_02867	86.1796	6.36872	3.7583	13.532	cysW_2	2.2528e-12	1.5039e-12	TRUE	Sulfate transport system permease protein CysW
LILKMKPI_02868	78.9022	3.40653	4.5337	23.1622	cysT	9.7679e-14	6.9007e-14	TRUE	Sulfate transport system permease protein CysT
LILKMKPI_02869	271.945	10.0715	4.755	27.0021	cysP	3.6745e-45	5.7773e-45	TRUE	Thiosulfate-binding protein
LILKMKPI_02875	257.007	59.2439	2.1171	4.33821	amiA	3.1522e-12	2.083e-12	TRUE	N-acetylmuramoyl-L-alanine amidase AmiA
LILKMKPI_02877	121.034	16.4402	2.8801	7.36201	mtnA	1.5319e-11	9.7868e-12	TRUE	Methylthioribose-1-phosphate isomerase
LILKMKPI_02878	55.155	6.51683	3.0812	8.46318	mtnK	1.3251e-06	6.2465e-07	TRUE	Methylthioribose kinase
LILKMKPI_02894	52.8568	8.29415	2.6719	6.37268	fepB	3.4195e-05	1.4327e-05	TRUE	Ferrienterobactin-binding periplasmic protein
LILKMKPI_02896	32.9398	3.25842	3.3376	10.1092	fepD	6.6552e-05	2.7219e-05	TRUE	Ferric enterobactin transport system permease protein FepD
LILKMKPI_02900	1174.34	553.19	1.086	2.12285	tal	0.0016458	0.00058398	TRUE	Transaldolase
LILKMKPI_02901	3299.34	985.523	1.7432	3.34777	tktB_2	4.2861e-78	1.0962e-77	TRUE	Transketolase 2
LILKMKPI_02913	588.703	247.047	1.2528	2.38303	--	0.0001466	5.8059e-05	TRUE	hypothetical protein
LILKMKPI_02922	248.197	83.8302	1.5659	2.96062	bepA_2	2.4455e-05	1.0373e-05	TRUE	Beta-barrel assembly-enhancing protease
LILKMKPI_02931	131.759	47.9876	1.4572	2.74575	yfgF_2	0.008124	0.0026798	TRUE	Cyclic di-GMP phosphodiesterase YfgF
LILKMKPI_02934	616.28	216.685	1.508	2.84415	guaB	7.1857e-10	4.2146e-10	TRUE	Inosine-5'-monophosphate dehydrogenase
LILKMKPI_02939	194.191	75.6841	1.3594	2.56578	der	0.0063537	0.0021216	TRUE	GTPase Der
LILKMKPI_02942	621.259	274.448	1.1787	2.26373	hisS	0.0013923	0.00049897	TRUE	Histidine--tRNA ligase
LILKMKPI_02944	797.066	248.528	1.6813	3.20717	rodZ	5.9703e-18	5.0084e-18	TRUE	Cytoskeleton protein RodZ
LILKMKPI_02945	743.06	127.374	2.5444	5.83365	rlmN	2.4892e-49	4.2077e-49	TRUE	Dual-specificity RNA methyltransferase RlmN
LILKMKPI_02959	279.222	53.6158	2.3807	5.20789	hscA	4.3663e-17	3.5567e-17	TRUE	Chaperone protein HscA
LILKMKPI_02960	102.266	14.0704	2.8616	7.26821	hscB	7.1547e-10	4.1995e-10	TRUE	Co-chaperone protein HscB
LILKMKPI_02961	216.024	33.7691	2.6774	6.39702	iscA_2	4.6805e-17	3.8009e-17	TRUE	Iron-binding protein IscA
LILKMKPI_02962	135.206	22.2165	2.6055	6.08602	iscU	1.0652e-10	6.5249e-11	TRUE	Iron-sulfur cluster assembly scaffold protein IscU
LILKMKPI_02963	1159.02	125.893	3.2026	9.20616	iscS	4.6491e-116	1.7864e-115	TRUE	Cysteine desulfurase IscS
LILKMKPI_02964	1721.29	94.6422	4.1849	18.1878	iscR	5.0228e-245	4.0789e-244	TRUE	HTH-type transcriptional regulator IscR
LILKMKPI_02965	1425.99	229.422	2.6359	6.21563	trmJ	4.9735e-100	1.599e-99	TRUE	tRNA (cytidine/uridine-2'-O-)-methyltransferase TrmJ
LILKMKPI_02966	3626.44	86.7924	5.3848	41.7817	suhB	0	0	TRUE	Inositol-1-monophosphatase
LILKMKPI_02974	106.48	10.6639	3.3198	9.98526	hmp	9.2588e-13	6.2657e-13	TRUE	Flavohemoprotein
LILKMKPI_02978	482.223	56.2818	3.099	8.56825	glrK	7.9361e-47	1.2863e-46	TRUE	Sensor histidine kinase GlrK
LILKMKPI_02986	254.709	17.6251	3.8531	14.451	yfhL	1.5294e-34	1.9493e-34	TRUE	putative ferredoxin-like protein YfhL
LILKMKPI_02989	85.7966	22.957	1.902	3.73731	recO	0.0005355	0.00020106	TRUE	DNA repair protein RecO
LILKMKPI_02992	224.833	65.0202	1.7899	3.45791	lepB	3.4444e-07	1.6977e-07	TRUE	Signal peptidase I
LILKMKPI_02993	625.473	194.616	1.6843	3.21384	lepA	1.6995e-14	1.2395e-14	TRUE	Elongation factor 4
LILKMKPI_02994	201.469	63.9835	1.6548	3.1488	--	2.4638e-05	1.0446e-05	TRUE	hypothetical protein
LILKMKPI_02995	548.102	237.42	1.207	2.30857	rseB	0.0011254	0.00040778	TRUE	Sigma-E factor regulatory protein RseB
LILKMKPI_02996	1902.46	666.643	1.5129	2.85383	rseA	1.1059e-27	1.2116e-27	TRUE	Anti-sigma-E factor RseA
LILKMKPI_02997	1602.56	726.923	1.1405	2.20457	rpoE	5.6085e-06	2.513e-06	TRUE	ECF RNA polymerase sigma-E factor
LILKMKPI_02998	318.673	37.6199	3.0825	8.47081	nadB	2.9428e-31	3.4753e-31	TRUE	L-aspartate oxidase
LILKMKPI_03000	462.689	178.621	1.3731	2.59027	srmB	1.5649e-05	6.7287e-06	TRUE	ATP-dependent RNA helicase SrmB
LILKMKPI_03003	361.188	112.267	1.6858	3.21719	rlmB_1	5.2702e-09	2.938e-09	TRUE	23S rRNA (guanosine-2'-O-)-methyltransferase RlmB
LILKMKPI_03011	946.061	431.74	1.1318	2.19132	ydaP	0.00071803	0.00026616	TRUE	Putative thiamine pyrophosphate-containing protein YdaP
LILKMKPI_03019	841.879	372.644	1.1758	2.25918	clpB_2	0.00022512	8.7658e-05	TRUE	Chaperone protein ClpB
LILKMKPI_03020	132.908	49.4687	1.4258	2.68663	yfiH	0.011358	0.0036666	TRUE	Laccase domain protein YfiH
LILKMKPI_03021	345.485	133.003	1.3772	2.59764	rluD	0.00017048	6.7245e-05	TRUE	Ribosomal large subunit pseudouridine synthase D
LILKMKPI_03028	202.618	74.7955	1.4377	2.70889	aroF	0.0014454	0.00051634	TRUE	Phospho-2-dehydro-3-deoxyheptonate aldolase%2C Tyr-sensitive
LILKMKPI_03029	96.1381	23.9938	2.0024	4.00666	--	7.7919e-05	3.1703e-05	TRUE	hypothetical protein
LILKMKPI_03030	155.506	52.2828	1.5726	2.9744	--	0.00075792	0.00028016	TRUE	hypothetical protein
LILKMKPI_03031	813.919	101.159	3.0083	8.04616	rplS	5.4974e-74	1.3283e-73	TRUE	50S ribosomal protein L19
LILKMKPI_03032	1661.93	168.105	3.3054	9.88609	trmD	4.9653e-174	2.8549e-173	TRUE	tRNA (guanine-N(1)-)-methyltransferase
LILKMKPI_03033	1040.67	145.74	2.836	7.14038	rimM	1.1715e-84	3.2493e-84	TRUE	Ribosome maturation factor RimM
LILKMKPI_03034	1041.43	139.223	2.9031	7.48032	rpsP	2.0525e-88	5.9881e-88	TRUE	30S ribosomal protein S16
LILKMKPI_03035	528.185	206.169	1.3572	2.56187	ffh	7.3673e-06	3.2584e-06	TRUE	Signal recognition particle protein
LILKMKPI_03044	630.069	227.645	1.4687	2.76772	smpB	3.8594e-09	2.1777e-09	TRUE	SsrA-binding protein
LILKMKPI_03109	145.548	44.7292	1.7022	3.25397	--	0.00016373	6.4648e-05	TRUE	hypothetical protein
LILKMKPI_03114	10062.3	4528.46	1.1519	2.22206	--	1.9669e-32	2.3983e-32	TRUE	hypothetical protein
LILKMKPI_03115	37.536	0	7.9855	253.44	nrdH	4.2782e-08	2.2436e-08	TRUE	Glutaredoxin-like protein NrdH
LILKMKPI_03116	27.1945	0	6.5205	91.8049	--	1.8014e-06	8.426e-07	TRUE	Putative NrdI-like protein
LILKMKPI_03117	133.674	5.92439	4.4959	22.5632	nrdE	4.8012e-22	4.6518e-22	TRUE	Ribonucleoside-diphosphate reductase 2 subunit alpha
LILKMKPI_03118	42.1323	2.07354	4.3448	20.3196	nrdF	9.7564e-08	4.971e-08	TRUE	Ribonucleoside-diphosphate reductase 2 subunit beta
LILKMKPI_03119	969.042	34.2134	4.8239	28.323	proV	6.7271e-158	3.4634e-157	TRUE	Glycine betaine/proline betaine transport system ATP-binding protein ProV
LILKMKPI_03120	299.905	19.1062	3.9724	15.6968	proW	8.066e-42	1.1876e-41	TRUE	Glycine betaine/proline betaine transport system permease protein ProW
LILKMKPI_03121	209.895	59.8364	1.8106	3.50788	proX	5.2435e-07	2.5559e-07	TRUE	Glycine betaine/proline betaine-binding periplasmic protein
LILKMKPI_03138	129.844	22.6608	2.5185	5.72986	recX	1.0397e-09	6.0529e-10	TRUE	Regulatory protein RecX
LILKMKPI_03139	2690.72	327.619	3.0379	8.21295	recA	2.5294e-244	2.0331e-243	TRUE	Protein RecA
LILKMKPI_03156	9890.36	2722.26	1.8612	3.6331	rpoS	9.9783e-285	9.4699e-284	TRUE	RNA polymerase sigma factor RpoS
LILKMKPI_03157	6407.55	2715.45	1.2386	2.35969	nlpD_1	8.1633e-34	1.0288e-33	TRUE	Murein hydrolase activator NlpD
LILKMKPI_03160	196.107	46.9508	2.0624	4.17681	truD	4.1351e-09	2.3249e-09	TRUE	tRNA pseudouridine synthase D
LILKMKPI_03162	149.761	26.956	2.474	5.55582	ispD	1.2968e-10	7.8817e-11	TRUE	2-C-methyl-D-erythritol 4-phosphate cytidylyltransferase
LILKMKPI_03163	268.497	55.8374	2.2656	4.80854	ftsB	8.0049e-15	5.9486e-15	TRUE	Cell division protein FtsB
LILKMKPI_03166	46.7285	11.2564	2.0536	4.15141	cysN	0.0043351	0.0014757	TRUE	Sulfate adenylyltransferase subunit 1
LILKMKPI_03167	20.6831	2.9622	2.8037	6.98229	cysD	0.0065638	0.0021862	TRUE	Sulfate adenylyltransferase subunit 2
LILKMKPI_03168	112.225	8.44226	3.7326	13.293	cysG_1	1.5508e-15	1.1872e-15	TRUE	Siroheme synthase
LILKMKPI_03173	232.493	69.3154	1.7459	3.35404	queD	6.5266e-07	3.1521e-07	TRUE	6-carboxy-5%2C6%2C7%2C8-tetrahydropterin synthase
LILKMKPI_03181	2913.64	783.353	1.8951	3.71948	pyrG_2	1.0754e-89	3.1609e-89	TRUE	CTP synthase
LILKMKPI_03199	422.855	113.748	1.8943	3.71742	csdA	2.1637e-14	1.5723e-14	TRUE	Cysteine desulfurase CsdA
LILKMKPI_03201	261.603	71.389	1.8736	3.66446	tcdA	3.428e-09	1.9371e-09	TRUE	tRNA threonylcarbamoyladenosine dehydratase
LILKMKPI_03215	234.792	89.3103	1.3945	2.62897	thyA	0.0014031	0.00050237	TRUE	Thymidylate synthase
LILKMKPI_03216	370.381	83.8302	2.1435	4.41833	lgt	1.8025e-17	1.4915e-17	TRUE	Prolipoprotein diacylglyceryl transferase
LILKMKPI_03250	392.213	27.9928	3.8085	14.0111	--	1.6196e-51	2.8509e-51	TRUE	hypothetical protein
LILKMKPI_03256	176.572	25.4749	2.7931	6.93118	--	2.5039e-15	1.8947e-15	TRUE	hypothetical protein
LILKMKPI_03284	2212.33	600.586	1.8811	3.68356	zapA	4.707e-67	1.0444e-66	TRUE	Cell division protein ZapA
LILKMKPI_03285	2252.93	264.969	3.0879	8.50258	ygfA	1.1266e-210	7.9232e-210	TRUE	5-formyltetrahydrofolate cyclo-ligase
LILKMKPI_03301	1385.77	202.762	2.7728	6.83433	metK	1.9264e-107	6.8048e-107	TRUE	S-adenosylmethionine synthase
LILKMKPI_03316	109.927	33.9172	1.6965	3.24114	hemN_1	0.0011282	0.00040838	TRUE	Oxygen-independent coproporphyrinogen-III oxidase-like protein YqeR
LILKMKPI_03323	546.57	162.032	1.7541	3.37316	parE	1.4885e-14	1.0917e-14	TRUE	DNA topoisomerase 4 subunit B
LILKMKPI_03332	145.548	31.3993	2.2127	4.63542	zupT	2.8013e-08	1.4909e-08	TRUE	Zinc transporter ZupT
LILKMKPI_03338	310.247	82.3491	1.9136	3.76748	--	3.0392e-11	1.9122e-11	TRUE	hypothetical protein
LILKMKPI_03343	423.238	92.7168	2.1906	4.56495	tsaD	8.686e-21	7.993e-21	TRUE	tRNA N6-adenosine threonylcarbamoyltransferase
LILKMKPI_03344	2169.43	679.528	1.6747	3.19253	rpsU	1.8802e-45	2.974e-45	TRUE	30S ribosomal protein S21
LILKMKPI_03345	1361.25	413.375	1.7194	3.29299	dnaG	8.6351e-32	1.0353e-31	TRUE	DNA primase
LILKMKPI_03382	265.05	19.1062	3.7942	13.8729	speC	3.2261e-35	4.1728e-35	TRUE	Constitutive ornithine decarboxylase
LILKMKPI_03407	2211.18	341.541	2.6947	6.47419	yghA_2	4.7152e-161	2.4436e-160	TRUE	putative oxidoreductase YghA
LILKMKPI_03408	268.88	15.6996	4.0982	17.127	exbD_2	5.5629e-39	7.8249e-39	TRUE	Biopolymer transport protein ExbD
LILKMKPI_03409	646.539	28.5852	4.4994	22.618	exbB_2	4.3745e-100	1.4122e-99	TRUE	Biopolymer transport protein ExbB
LILKMKPI_03411	240.537	87.3848	1.4608	2.75261	yghB	0.00032303	0.00012384	TRUE	Inner membrane protein YghB
LILKMKPI_03466	3801.86	942.423	2.0123	4.03425	--	2.2973e-138	1.0582e-137	TRUE	hypothetical protein
LILKMKPI_03481	408.683	45.6178	3.1633	8.95877	rplI	2.7153e-41	3.9463e-41	TRUE	50S ribosomal protein L9
LILKMKPI_03482	24.5133	1.4811	4.0488	16.5505	rpsR	8.9866e-05	3.6358e-05	TRUE	30S ribosomal protein S18
LILKMKPI_03483	181.935	16.4402	3.4681	11.0663	priB	5.0405e-22	4.8717e-22	TRUE	Primosomal replication protein N
LILKMKPI_03484	2689.19	278.298	3.2725	9.66319	rpsF	4.8554e-276	4.4996e-275	TRUE	30S ribosomal protein S6
LILKMKPI_03488	156.655	24.1419	2.698	6.48902	tar_5	5.8555e-13	3.9969e-13	TRUE	Methyl-accepting chemotaxis protein II
LILKMKPI_03503	409.832	180.102	1.1862	2.27553	mutL	0.0079344	0.0026205	TRUE	DNA mismatch repair protein MutL
LILKMKPI_03507	264.284	75.3879	1.8097	3.50569	queG	1.8501e-08	9.9611e-09	TRUE	Epoxyqueuosine reductase
LILKMKPI_03517	212.959	50.6536	2.0718	4.20411	epmA	7.0812e-10	4.1595e-10	TRUE	Elongation factor P--(R)-beta-lysine ligase
LILKMKPI_03523	219.854	31.6955	2.7942	6.93646	sugE	1.0139e-18	8.796e-19	TRUE	Quaternary ammonium compound-resistance protein SugE
LILKMKPI_03532	150.144	56.7261	1.4043	2.64689	--	0.009408	0.0030725	TRUE	hypothetical protein
LILKMKPI_03616	404.087	75.8323	2.4138	5.32876	crfC	9.6017e-25	9.9387e-25	TRUE	Clamp-binding protein CrfC
LILKMKPI_03632	121.034	10.2196	3.566	11.8433	soxS	9.9666e-16	7.6893e-16	TRUE	Regulatory protein SoxS
LILKMKPI_03634	2341.4	22.957	6.6723	101.991	--	0	0	TRUE	hypothetical protein
LILKMKPI_03635	35.2379	4.14708	3.087	8.49727	--	0.00010816	4.3336e-05	TRUE	hypothetical protein
LILKMKPI_03636	72.3909	16.7364	2.1128	4.3253	pleD_2	0.00022464	8.7514e-05	TRUE	Response regulator PleD
LILKMKPI_03637	2205.43	481.357	2.1959	4.58175	ssb_2	8.6074e-102	2.825e-101	TRUE	Single-stranded DNA-binding protein
LILKMKPI_03638	2926.28	393.528	2.8945	7.43586	uvrA_1	1.1781e-243	9.3739e-243	TRUE	UvrABC system protein A
LILKMKPI_03639	46.7285	2.66598	4.1316	17.5281	--	4.5292e-08	2.3674e-08	TRUE	hypothetical protein
LILKMKPI_03648	1304.18	4.4433	8.1973	293.517	pspG	1.6462e-225	1.2119e-224	TRUE	Phage shock protein G
LILKMKPI_03649	400.639	48.2838	3.0527	8.29763	dusA	3.0346e-38	4.2011e-38	TRUE	tRNA-dihydrouridine(20/20a) synthase
LILKMKPI_03653	21151.2	10337.8	1.0328	2.04599	--	6.2139e-25	6.4489e-25	TRUE	hypothetical protein
LILKMKPI_03654	229.812	87.9773	1.3853	2.61226	dinF	0.0018717	0.00065967	TRUE	DNA damage-inducible protein F
LILKMKPI_03655	1437.09	311.327	2.2067	4.61618	lexA_3	8.9325e-68	2.0046e-67	TRUE	LexA repressor
LILKMKPI_03666	130.227	41.767	1.6406	3.11795	--	0.0008424	0.0003095	TRUE	hypothetical protein
LILKMKPI_03670	26.0454	3.85086	2.7578	6.76364	gfcB	0.0026838	0.00093459	TRUE	putative lipoprotein GfcB
LILKMKPI_03671	4374.86	1711.26	1.3542	2.55655	--	9.2968e-38	1.278e-37	TRUE	hypothetical protein
LILKMKPI_03676	108.012	8.73848	3.6277	12.3608	--	1.6701e-14	1.2192e-14	TRUE	hypothetical protein
LILKMKPI_03687	91.1589	25.0306	1.8647	3.64192	aceK	0.00053442	0.00020075	TRUE	Isocitrate dehydrogenase kinase/phosphatase
LILKMKPI_03688	324.035	33.0285	3.2944	9.811	aceA	3.2171e-35	4.168e-35	TRUE	Isocitrate lyase
LILKMKPI_03689	548.102	55.245	3.3105	9.9211	aceB	8.51e-59	1.68e-58	TRUE	Malate synthase A
LILKMKPI_03690	57.4531	4.73952	3.5996	12.1224	metA	2.5951e-08	1.385e-08	TRUE	Homoserine O-succinyltransferase
LILKMKPI_03711	1146	173.289	2.7254	6.61344	rplQ	2.8835e-86	8.1704e-86	TRUE	50S ribosomal protein L17
LILKMKPI_03712	3200.52	572.445	2.4831	5.59098	rpoA	7.7718e-196	5.1016e-195	TRUE	DNA-directed RNA polymerase subunit alpha
LILKMKPI_03713	3434.16	708.41	2.2773	4.8477	rpsD	3.2999e-172	1.8567e-171	TRUE	30S ribosomal protein S4
LILKMKPI_03714	3212.01	721.147	2.1551	4.454	rpsM	1.3626e-140	6.389e-140	TRUE	30S ribosomal protein S13
LILKMKPI_03715	105.331	27.5484	1.9349	3.82352	rpmJ	8.3024e-05	3.3693e-05	TRUE	50S ribosomal protein L36
LILKMKPI_03716	1451.65	447.736	1.697	3.24226	secY	2.3012e-32	2.7973e-32	TRUE	Protein translocase subunit SecY
LILKMKPI_03717	348.932	105.602	1.7243	3.3042	rplO	2.4083e-09	1.3766e-09	TRUE	50S ribosomal protein L15
LILKMKPI_03718	619.727	193.283	1.6809	3.20628	rpsE	2.7617e-14	2.0013e-14	TRUE	30S ribosomal protein S5
LILKMKPI_03719	143.25	43.5443	1.718	3.2898	rplR	0.00014504	5.7498e-05	TRUE	50S ribosomal protein L18
LILKMKPI_03720	388.766	115.229	1.7544	3.37386	rplF	8.8341e-11	5.4365e-11	TRUE	50S ribosomal protein L6
LILKMKPI_03721	341.654	113.008	1.5961	3.02325	rpsH	2.7894e-07	1.3845e-07	TRUE	30S ribosomal protein S8
LILKMKPI_03722	226.365	66.057	1.7769	3.42689	rpsN	4.3249e-07	2.1173e-07	TRUE	30S ribosomal protein S14
LILKMKPI_03723	505.204	170.474	1.5673	2.9635	rplE	1.6282e-09	9.3821e-10	TRUE	50S ribosomal protein L5
LILKMKPI_03725	1740.45	731.218	1.2511	2.38023	rplN	7.7986e-11	4.8105e-11	TRUE	50S ribosomal protein L14
LILKMKPI_03726	144.399	22.8089	2.6624	6.33085	rpsQ	8.8597e-12	5.7534e-12	TRUE	30S ribosomal protein S17
LILKMKPI_03728	280.371	24.4381	3.5201	11.4724	rplP	9.8083e-34	1.2342e-33	TRUE	50S ribosomal protein L16
LILKMKPI_03729	1077.05	88.5697	3.6041	12.1602	rpsC	1.2924e-128	5.6559e-128	TRUE	30S ribosomal protein S3
LILKMKPI_03730	244.75	17.3289	3.8201	14.1242	rplV	6.424e-33	7.9941e-33	TRUE	50S ribosomal protein L22
LILKMKPI_03731	160.869	13.6261	3.5614	11.8056	rpsS	2.3278e-20	2.1125e-20	TRUE	30S ribosomal protein S19
LILKMKPI_03732	2108.53	117.895	4.1607	17.8853	rplB	7.7162e-298	7.5977e-297	TRUE	50S ribosomal protein L2
LILKMKPI_03733	223.684	10.0715	4.4731	22.2094	rplW	1.2806e-35	1.6673e-35	TRUE	50S ribosomal protein L23
LILKMKPI_03734	1637.41	70.056	4.5468	23.3735	rplD	8.5862e-253	7.1194e-252	TRUE	50S ribosomal protein L4
LILKMKPI_03735	2387.37	119.821	4.3165	19.9249	rplC	0	0	TRUE	50S ribosomal protein L3
LILKMKPI_03736	5391.01	262.599	4.3596	20.5291	rpsJ	0	0	TRUE	30S ribosomal protein S10
LILKMKPI_03741	2807.16	842.301	1.7367	3.33272	fusA	6.8374e-66	1.5044e-65	TRUE	Elongation factor G
LILKMKPI_03742	478.776	185.434	1.3684	2.58184	rpsG	1.32e-05	5.7258e-06	TRUE	30S ribosomal protein S7
LILKMKPI_03743	951.423	298.145	1.6741	3.1912	rpsL	7.9122e-21	7.298e-21	TRUE	30S ribosomal protein S12
LILKMKPI_03750	1438.63	529.789	1.4412	2.71547	slyD	1.3734e-17	1.1412e-17	TRUE	FKBP-type peptidyl-prolyl cis-trans isomerase SlyD
LILKMKPI_03760	389.915	91.8281	2.0862	4.24628	--	3.7864e-17	3.0907e-17	TRUE	hypothetical protein
LILKMKPI_03770	460.774	195.801	1.2347	2.35332	ppiA	0.0013167	0.00047315	TRUE	Peptidyl-prolyl cis-trans isomerase A
LILKMKPI_03793	484.138	136.557	1.8259	3.54528	mrcA	1.1329e-14	8.3716e-15	TRUE	Penicillin-binding protein 1A
LILKMKPI_03795	650.369	197.727	1.7178	3.28934	igaA	5.7305e-16	4.4692e-16	TRUE	Intracellular growth attenuator protein igaA
LILKMKPI_03811	534.697	94.4941	2.5004	5.65842	nfuA	1.0354e-34	1.3241e-34	TRUE	Fe/S biogenesis protein NfuA
LILKMKPI_03812	108352	830.156	7.0281	130.518	cspA	0	0	TRUE	Cold shock protein CspA
LILKMKPI_03820	401.789	128.115	1.649	3.13616	cph2_2	3.2316e-09	1.8274e-09	TRUE	Phytochrome-like protein cph2
LILKMKPI_03834	80.4343	22.2165	1.8562	3.62053	yhhW	0.0012385	0.00044647	TRUE	Quercetin 2%2C3-dioxygenase
LILKMKPI_03854	10124.4	1218.8	3.0543	8.30684	rpoH	0	0	TRUE	RNA polymerase sigma factor RpoH
LILKMKPI_03862	266.965	55.6893	2.2612	4.7939	zntA	1.1031e-14	8.1591e-15	TRUE	Lead%2C cadmium%2C zinc and mercury-transporting ATPase
LILKMKPI_03867	121.034	10.2196	3.566	11.8433	yhhQ	9.9666e-16	7.6893e-16	TRUE	Inner membrane protein YhhQ
LILKMKPI_03868	544.655	230.015	1.2436	2.36789	--	0.00035486	0.0001353	TRUE	hypothetical protein
LILKMKPI_03874	907.759	187.951	2.2719	4.82959	pitA	1.3561e-46	2.1889e-46	TRUE	Low-affinity inorganic phosphate transporter 1
LILKMKPI_03885	24.5133	4.59141	2.4166	5.33911	dmlR_9	0.01132	0.0036578	TRUE	HTH-type transcriptional regulator DmlR
LILKMKPI_03892	683.309	293.109	1.2211	2.33124	--	0.00015842	6.2647e-05	TRUE	hypothetical protein
LILKMKPI_03912	1435.94	86.0518	4.0606	16.6864	eptB	3.9935e-198	2.7118e-197	TRUE	Kdo(2)-lipid A phosphoethanolamine 7''-transferase
LILKMKPI_03920	101.117	7.25738	3.8004	13.9327	zinT	1.9117e-14	1.3917e-14	TRUE	Metal-binding protein ZinT
LILKMKPI_03941	622.025	128.115	2.2795	4.8551	--	1.02e-32	1.2594e-32	TRUE	hypothetical protein
LILKMKPI_03966	140.186	2.9622	5.5645	47.324	sbp	2.1377e-26	2.2879e-26	TRUE	Sulfate-binding protein
LILKMKPI_03968	941.081	224.238	2.0693	4.19683	fieF	2.717e-38	3.768e-38	TRUE	Ferrous-iron efflux pump FieF
LILKMKPI_03969	13732.4	896.065	3.9378	15.3248	cpxP	0	0	TRUE	Periplasmic protein CpxP
LILKMKPI_03972	72.0079	17.477	2.0427	4.12016	trmL	0.00043893	0.00016607	TRUE	tRNA (cytidine(34)-2'-O)-methyltransferase
LILKMKPI_03990	1500.29	585.626	1.3572	2.56187	--	4.1225e-14	2.9683e-14	TRUE	hypothetical protein
LILKMKPI_03997	105.331	18.3656	2.5198	5.73503	mutM	3.7953e-08	1.997e-08	TRUE	Formamidopyrimidine-DNA glycosylase
LILKMKPI_03999	3193.24	359.315	3.1517	8.88702	rpmB	0	0	TRUE	50S ribosomal protein L28
LILKMKPI_04001	483.372	195.357	1.307	2.47426	coaBC	0.0001024	4.1155e-05	TRUE	Coenzyme A biosynthesis bifunctional protein CoaBC
LILKMKPI_04005	281.52	62.2061	2.1781	4.52557	rph	3.7094e-14	2.6757e-14	TRUE	Ribonuclease PH
LILKMKPI_04007	178.105	41.3227	2.1077	4.31004	--	7.9827e-09	4.4065e-09	TRUE	hypothetical protein
LILKMKPI_04039	3757.05	324.361	3.5339	11.5827	typA	0	0	TRUE	GTP-binding protein TypA/BipA
LILKMKPI_04040	234.026	56.2818	2.0559	4.15803	glnA	1.6118e-10	9.7662e-11	TRUE	Glutamine synthetase
LILKMKPI_04050	1071.31	160.699	2.7369	6.66636	srkA	1.9762e-81	5.3493e-81	TRUE	Stress response kinase A
LILKMKPI_04070	252.027	60.4288	2.0603	4.17073	asnA	2.8328e-11	1.7866e-11	TRUE	Aspartate--ammonia ligase
LILKMKPI_04071	35.2379	5.18385	2.765	6.79748	asnC	0.00046426	0.00017531	TRUE	Regulatory protein AsnC
LILKMKPI_04072	370.764	130.485	1.5066	2.8414	cysJ_3	1.8418e-06	8.61e-07	TRUE	Sulfite reductase [NADPH] flavoprotein alpha-component
LILKMKPI_04073	585.638	135.965	2.1068	4.30735	mnmG	1.3814e-25	1.4548e-25	TRUE	tRNA uridine 5-carboxymethylaminomethyl modification enzyme MnmG
LILKMKPI_04088	648.837	188.396	1.7841	3.44404	pstS	7.0185e-18	5.869e-18	TRUE	Phosphate-binding protein PstS
LILKMKPI_04095	62.0493	17.477	1.828	3.55045	adeP	0.005613	0.0018814	TRUE	Adenine permease AdeP
LILKMKPI_04113	224.833	45.4697	2.3059	4.94476	mnmE	3.8332e-13	2.6325e-13	TRUE	tRNA modification GTPase MnmE
LILKMKPI_04114	1298.82	163.81	2.9871	7.92879	yidC	1.6278e-115	6.1944e-115	TRUE	Membrane protein insertase YidC
LILKMKPI_04115	1964.51	264.672	2.8919	7.42247	rnpA	6.2678e-164	3.3586e-163	TRUE	Ribonuclease P protein component
LILKMKPI_04454	115.289	39.9897	1.5276	2.88306	hipA	0.0062088	0.002075	TRUE	Serine/threonine-protein kinase HipA
LILKMKPI_04458	60.5172	10.812	2.4847	5.59718	--	4.0362e-05	1.6786e-05	TRUE	hypothetical protein
LILKMKPI_04459	45.9625	11.2564	2.0297	4.0832	--	0.0053704	0.001804	TRUE	hypothetical protein
LILKMKPI_04462	34.0888	5.62818	2.5986	6.05699	sdaC_2	0.0012236	0.00044171	TRUE	Serine transporter
LILKMKPI_04464	34.8549	7.84982	2.1506	4.44012	tap	0.0087811	0.0028857	TRUE	Methyl-accepting chemotaxis protein IV
LILKMKPI_04495	85.4136	17.7732	2.2648	4.80588	dsbD_2	1.1931e-05	5.1838e-06	TRUE	Thiol:disulfide interchange protein DsbD
LILKMKPI_04526	609.386	265.413	1.1991	2.29596	bluR_2	0.0007797	0.00028794	TRUE	HTH-type transcriptional repressor BluR
LILKMKPI_04527	856.817	119.969	2.8363	7.14186	bluF_2	4.8381e-70	1.1046e-69	TRUE	Blue light- and temperature-regulated antirepressor BluF
LILKMKPI_04528	9385.15	705.744	3.7332	13.2986	ycgZ	0	0	TRUE	putative two-component-system connector protein YcgZ
LILKMKPI_04529	2559.73	127.819	4.3238	20.026	ymgA	0	0	TRUE	putative two-component-system connector protein YmgA
LILKMKPI_04530	1703.29	67.0938	4.666	25.3867	ariR_2	8.6787e-269	7.5958e-268	TRUE	putative two-component-system connector protein AriR
LILKMKPI_04531	486.819	45.9141	3.4064	10.603	cpdA_2	1.1059e-54	2.0741e-54	TRUE	3'%2C5'-cyclic adenosine monophosphate phosphodiesterase CpdA
LILKMKPI_04565	40.2172	7.84982	2.3571	5.12339	iucC	0.0016217	0.00057671	TRUE	Aerobactin synthase
LILKMKPI_04566	22.5982	3.11031	2.8611	7.26569	iucB	0.0037748	0.0012939	TRUE	N(6)-hydroxylysine O-acetyltransferase
LILKMKPI_04567	62.0493	5.18385	3.5813	11.9696	iucA	8.1779e-09	4.5079e-09	TRUE	N(2)-citryl-N(6)-acetyl-N(6)-hydroxylysine synthase
LILKMKPI_00006	36.3869	268.227	-2.882	0.135654	hokB_1	1.0031e-77	2.5571e-77	TRUE	Toxin HokB
LILKMKPI_00015	63.9644	204.688	-1.6781	0.312494	--	2.6096e-42	3.8785e-42	TRUE	hypothetical protein
LILKMKPI_00018	6.12833	27.9928	-2.1915	0.218924	mngR_1	2.9785e-08	1.5842e-08	TRUE	Mannosyl-D-glycerate transport/metabolism system repressor MngR
LILKMKPI_00020	2.29812	9.92336	-2.1104	0.231583	aglB	0.0011221	0.00040676	TRUE	6-phospho-alpha-glucosidase
LILKMKPI_00028	11.8736	38.0642	-1.6807	0.311931	--	4.0696e-09	2.293e-09	TRUE	hypothetical protein
LILKMKPI_00029	48.2606	124.116	-1.3628	0.388827	--	9.1913e-23	9.0387e-23	TRUE	hypothetical protein
LILKMKPI_00030	39.4511	80.4237	-1.0276	0.490525	motB_1	1.102e-12	7.4316e-13	TRUE	Motility protein B
LILKMKPI_00031	91.9249	345.096	-1.9085	0.266369	--	8.4361e-77	2.1096e-76	TRUE	hypothetical protein
LILKMKPI_00032	15.3208	76.7209	-2.3241	0.199699	--	8.2188e-21	7.5719e-21	TRUE	hypothetical protein
LILKMKPI_00033	29.4926	182.027	-2.6257	0.162026	--	1.1101e-50	1.926e-50	TRUE	hypothetical protein
LILKMKPI_00034	19.151	150.776	-2.9769	0.127018	--	3.1969e-45	5.0365e-45	TRUE	hypothetical protein
LILKMKPI_00035	81.5834	446.847	-2.4534	0.18258	--	7.7088e-117	3.0061e-116	TRUE	hypothetical protein
LILKMKPI_00036	3.83021	83.9783	-4.4545	0.0456102	--	1.4975e-29	1.6924e-29	TRUE	hypothetical protein
LILKMKPI_00037	3.44718	71.8333	-4.3812	0.0479874	--	1.8475e-25	1.9382e-25	TRUE	hypothetical protein
LILKMKPI_00038	265.05	2289.63	-3.1108	0.115759	--	0	0	TRUE	hypothetical protein
LILKMKPI_00040	3.06416	10.6639	-1.7992	0.287334	--	0.0014146	0.00050605	TRUE	hypothetical protein
LILKMKPI_00041	4.97927	109.749	-4.4621	0.0453706	--	4.1519e-38	5.7276e-38	TRUE	hypothetical protein
LILKMKPI_00042	1.53208	27.5484	-4.1684	0.0556143	--	1.288e-10	7.8403e-11	TRUE	hypothetical protein
LILKMKPI_00043	43.6643	243.789	-2.4811	0.179108	--	4.8135e-65	1.0474e-64	TRUE	hypothetical protein
LILKMKPI_00044	12.6397	44.8773	-1.828	0.281655	stp	4.5369e-11	2.8386e-11	TRUE	Serine/threonine phosphatase stp
LILKMKPI_00045	22.9812	148.85	-2.6953	0.154395	--	2.1974e-42	3.272e-42	TRUE	hypothetical protein
LILKMKPI_00046	20.3001	130.337	-2.6827	0.15575	--	3.1307e-37	4.2445e-37	TRUE	hypothetical protein
LILKMKPI_00047	13.0227	37.768	-1.5361	0.344816	--	1.4624e-08	7.9283e-09	TRUE	hypothetical protein
LILKMKPI_00048	41.7492	230.459	-2.4647	0.181155	--	2.4334e-61	5.0442e-61	TRUE	hypothetical protein
LILKMKPI_00049	18.002	128.411	-2.8345	0.140194	--	8.1562e-38	1.1232e-37	TRUE	hypothetical protein
LILKMKPI_00050	8.80947	105.899	-3.5875	0.0831869	--	6.2194e-35	7.992e-35	TRUE	hypothetical protein
LILKMKPI_00051	70.8588	256.971	-1.8586	0.275744	clpB_1	1.3222e-56	2.5278e-56	TRUE	Chaperone protein ClpB
LILKMKPI_00052	92.691	226.756	-1.2906	0.408781	spk1	1.1303e-38	1.5758e-38	TRUE	Serine/threonine-protein kinase PK-1
LILKMKPI_00053	17.6189	155.96	-3.146	0.112969	--	5.6986e-48	9.3908e-48	TRUE	hypothetical protein
LILKMKPI_00054	10.3416	93.3092	-3.1736	0.110828	--	1.6688e-29	1.8832e-29	TRUE	hypothetical protein
LILKMKPI_00055	6.51135	29.7701	-2.1928	0.218727	vgrG1_1	1.0834e-08	5.9181e-09	TRUE	Actin cross-linking toxin VgrG1
LILKMKPI_00056	12.6397	78.6463	-2.6374	0.160718	--	6.5611e-23	6.4846e-23	TRUE	hypothetical protein
LILKMKPI_00057	10.3416	73.0182	-2.8198	0.14163	--	3.7063e-22	3.6048e-22	TRUE	hypothetical protein
LILKMKPI_00058	21.4491	137.15	-2.6768	0.156388	--	4.8711e-39	6.8763e-39	TRUE	hypothetical protein
LILKMKPI_00059	38.6851	268.671	-2.796	0.143986	rhsC_1	1.3439e-76	3.35e-76	TRUE	Putative deoxyribonuclease RhsC
LILKMKPI_00060	14.9378	47.6914	-1.6748	0.31321	--	4.8762e-11	3.0388e-11	TRUE	hypothetical protein
LILKMKPI_00061	3.83021	24.4381	-2.6736	0.156735	--	3.4835e-08	1.8428e-08	TRUE	hypothetical protein
LILKMKPI_00062	2.29812	92.1243	-5.3251	0.0249451	--	2.6788e-32	3.2513e-32	TRUE	hypothetical protein
LILKMKPI_00063	6.12833	27.2522	-2.1528	0.224876	--	5.4494e-08	2.8296e-08	TRUE	hypothetical protein
LILKMKPI_00066	5.74531	27.1041	-2.2381	0.211965	--	3.9606e-08	2.0826e-08	TRUE	hypothetical protein
LILKMKPI_00071	4.59625	123.672	-4.7499	0.0371653	--	6.0052e-43	9.0968e-43	TRUE	hypothetical protein
LILKMKPI_00072	3.44718	8.14604	-1.2407	0.423167	rhsC_2	0.015151	0.0047948	TRUE	Putative deoxyribonuclease RhsC
LILKMKPI_00073	5.74531	26.956	-2.2302	0.213129	rhsC_3	4.4723e-08	2.3408e-08	TRUE	Putative deoxyribonuclease RhsC
LILKMKPI_00074	2.68114	14.6629	-2.4512	0.182859	--	3.1705e-05	1.3327e-05	TRUE	hypothetical protein
LILKMKPI_00076	6.12833	18.3656	-1.5834	0.333695	--	6.4432e-05	2.642e-05	TRUE	hypothetical protein
LILKMKPI_00078	11.1076	40.2859	-1.8587	0.275725	--	3.4501e-10	2.0589e-10	TRUE	hypothetical protein
LILKMKPI_00080	1.53208	15.5515	-3.3435	0.0985159	--	3.1769e-06	1.4583e-06	TRUE	hypothetical protein
LILKMKPI_00081	6.12833	19.1062	-1.6405	0.320745	--	3.633e-05	1.5166e-05	TRUE	hypothetical protein
LILKMKPI_00082	4.21323	12.7374	-1.5961	0.33077	--	0.00084482	0.0003101	TRUE	hypothetical protein
LILKMKPI_00083	4.59625	13.478	-1.5521	0.341013	--	0.00067942	0.00025233	TRUE	hypothetical protein
LILKMKPI_00084	3.83021	9.18281	-1.2615	0.41711	--	0.0094641	0.0030872	TRUE	hypothetical protein
LILKMKPI_00086	306.799	695.82	-1.1814	0.440923	tpiA	1.0557e-107	3.746e-107	TRUE	Triosephosphate isomerase
LILKMKPI_00087	21.4491	61.1694	-1.5119	0.350649	--	7.6135e-13	5.1744e-13	TRUE	hypothetical protein
LILKMKPI_00093	38.3021	196.394	-2.3583	0.195021	mtlA	3.9066e-51	6.8384e-51	TRUE	PTS system mannitol-specific EIICBA component
LILKMKPI_00103	1.9151	20.8835	-3.4469	0.0917022	rhaR_1	5.5293e-08	2.8636e-08	TRUE	HTH-type transcriptional activator RhaR
LILKMKPI_00105	8.04343	18.6618	-1.2142	0.431012	vapC_1	0.00026574	0.00010281	TRUE	tRNA(fMet)-specific endonuclease VapC
LILKMKPI_00107	65.1135	234.162	-1.8465	0.278066	fdoI	1.6646e-51	2.9202e-51	TRUE	Formate dehydrogenase%2C cytochrome b556(fdo) subunit
LILKMKPI_00108	72.3909	215.796	-1.5758	0.335457	fdoH	1.4607e-42	2.1875e-42	TRUE	Formate dehydrogenase-O iron-sulfur subunit
LILKMKPI_00109	306.416	901.1	-1.5562	0.340046	fdoG_1	2.717e-170	1.5179e-169	TRUE	Formate dehydrogenase-O major subunit
LILKMKPI_00110	138.27	468.027	-1.7591	0.295432	fdoG_2	1.1346e-97	3.5892e-97	TRUE	Formate dehydrogenase-O major subunit
LILKMKPI_00124	3.44718	13.478	-1.9671	0.255767	rhaS_1	0.00021144	8.2615e-05	TRUE	HTH-type transcriptional activator RhaS
LILKMKPI_00125	3.44718	16.7364	-2.2795	0.205969	rhaR_2	1.4091e-05	6.0919e-06	TRUE	HTH-type transcriptional activator RhaR
LILKMKPI_00129	8.42645	154.182	-4.1936	0.0546513	lldD	2.6785e-52	4.817e-52	TRUE	L-lactate dehydrogenase
LILKMKPI_00130	1.9151	55.3931	-4.8542	0.0345732	lldR_1	3.6711e-20	3.3087e-20	TRUE	Putative L-lactate dehydrogenase operon regulatory protein
LILKMKPI_00131	11.4906	211.205	-4.2001	0.0544056	lldP	5.472e-71	1.2603e-70	TRUE	L-lactate permease
LILKMKPI_00133	9.19249	22.957	-1.3204	0.400424	--	2.9981e-05	1.2643e-05	TRUE	hypothetical protein
LILKMKPI_00135	140.952	3802.28	-4.7536	0.0370701	glpK	0	0	TRUE	Glycerol kinase
LILKMKPI_00136	21.0661	1217.61	-5.853	0.017301	glpF	0	0	TRUE	Glycerol uptake facilitator protein
LILKMKPI_00143	35.6209	181.435	-2.3487	0.196323	cytR_1	2.962e-47	4.8307e-47	TRUE	HTH-type transcriptional repressor CytR
LILKMKPI_00156	111.842	235.643	-1.0751	0.474638	ppc	3.0715e-35	3.9859e-35	TRUE	Phosphoenolpyruvate carboxylase
LILKMKPI_00157	69.7097	140.704	-1.0132	0.495446	argE	7.5317e-21	6.9633e-21	TRUE	Acetylornithine deacetylase
LILKMKPI_00159	103.033	349.243	-1.7611	0.295023	argB	2.024e-73	4.8459e-73	TRUE	Acetylglutamate kinase
LILKMKPI_00160	124.482	368.942	-1.5675	0.337393	argG	3.1993e-71	7.434e-71	TRUE	Argininosuccinate synthase
LILKMKPI_00161	165.465	795.498	-2.2653	0.208006	argH	3.4083e-196	2.2561e-195	TRUE	Argininosuccinate lyase
LILKMKPI_00176	21.8322	126.042	-2.5294	0.173211	gltC_1	7.1613e-35	9.1874e-35	TRUE	HTH-type transcriptional regulator GltC
LILKMKPI_00177	49.0266	193.876	-1.9835	0.252876	--	4.1577e-45	6.524e-45	TRUE	hypothetical protein
LILKMKPI_00178	19.9171	46.2103	-1.2142	0.431012	comM	9.5634e-09	5.2533e-09	TRUE	Competence protein ComM
LILKMKPI_00248	24.1303	132.855	-2.4609	0.181633	--	4.4889e-36	5.9328e-36	TRUE	hypothetical protein
LILKMKPI_00250	43.2813	91.8281	-1.0852	0.471327	fadB	8.5732e-15	6.3589e-15	TRUE	Fatty acid oxidation complex subunit alpha
LILKMKPI_00276	5.74531	16.2921	-1.5037	0.352648	--	0.00022274	8.6816e-05	TRUE	hypothetical protein
LILKMKPI_00277	3.44718	45.0254	-3.7072	0.0765635	chbA_1	6.1323e-16	4.7779e-16	TRUE	PTS system N%2CN'-diacetylchitobiose-specific EIIA component
LILKMKPI_00278	3.06416	104.269	-5.0887	0.0293866	celA_1	1.792e-36	2.3884e-36	TRUE	PTS system cellobiose-specific EIIB component
LILKMKPI_00287	87.7117	584.442	-2.7362	0.15008	rsd	2.2094e-162	1.1602e-161	TRUE	Regulator of sigma D
LILKMKPI_00288	18.002	53.0233	-1.5585	0.339504	nudC	1.4816e-11	9.4808e-12	TRUE	NADH pyrophosphatase
LILKMKPI_00294	93.84	1706.52	-4.1847	0.0549895	hupA	0	0	TRUE	DNA-binding protein HU-alpha
LILKMKPI_00341	82.7324	785.13	-3.2464	0.105375	mdh	2.7601e-237	2.1315e-236	TRUE	Malate dehydrogenase
LILKMKPI_00356	32.5567	71.2408	-1.1297	0.457011	gltD	4.0255e-12	2.6446e-12	TRUE	Glutamate synthase [NADPH] small chain
LILKMKPI_00358	6.12833	20.5873	-1.7482	0.297673	rimO_1	1.1421e-05	4.9703e-06	TRUE	Ribosomal protein S12 methylthiotransferase RimO
LILKMKPI_00359	127.163	275.188	-1.1137	0.462107	arcB	6.7596e-42	9.9899e-42	TRUE	Aerobic respiration control sensor protein ArcB
LILKMKPI_00360	42.1323	143.222	-1.7653	0.294166	elbB	3.4076e-31	4.0122e-31	TRUE	Glyoxalase ElbB
LILKMKPI_00361	26.8114	80.5718	-1.5874	0.332771	mtgA	5.3977e-17	4.3653e-17	TRUE	Biosynthetic peptidoglycan transglycosylase
LILKMKPI_00364	55.155	167.808	-1.6053	0.328667	ptsN	6.4034e-34	8.1224e-34	TRUE	Nitrogen regulatory protein
LILKMKPI_00409	3.44718	18.0694	-2.3901	0.190769	--	4.6038e-06	2.077e-06	TRUE	hypothetical protein
LILKMKPI_00410	7.27739	25.4749	-1.8076	0.285666	yhbU	7.7559e-07	3.7229e-07	TRUE	putative protease YhbU
LILKMKPI_00411	20.3001	85.4594	-2.0738	0.237533	--	2.0294e-21	1.9099e-21	TRUE	hypothetical protein
LILKMKPI_00412	22.5982	64.5759	-1.5148	0.349945	--	1.7048e-13	1.1937e-13	TRUE	hypothetical protein
LILKMKPI_00416	21.0661	88.8659	-2.0767	0.237056	--	3.1401e-22	3.0651e-22	TRUE	hypothetical protein
LILKMKPI_00423	2.29812	12.4412	-2.4366	0.184718	--	0.00013052	5.1978e-05	TRUE	hypothetical protein
LILKMKPI_00425	24.1303	72.8701	-1.5945	0.331137	--	1.459e-15	1.119e-15	TRUE	hypothetical protein
LILKMKPI_00433	11.1076	132.558	-3.577	0.0837945	yhaH	3.0114e-43	4.5882e-43	TRUE	Inner membrane protein YhaH
LILKMKPI_00434	51.7078	119.228	-1.2053	0.433679	yqjG	3.8514e-20	3.4632e-20	TRUE	Glutathionyl-hydroquinone reductase YqjG
LILKMKPI_00445	0	11.7007	-3.933	0.065471	--	3.1835e-05	1.3374e-05	TRUE	hypothetical protein
LILKMKPI_00449	166.231	359.611	-1.1132	0.462268	--	3.4237e-54	6.3307e-54	TRUE	hypothetical protein
LILKMKPI_00452	52.0908	108.416	-1.0575	0.480464	lldR_2	6.7811e-17	5.4339e-17	TRUE	Putative L-lactate dehydrogenase operon regulatory protein
LILKMKPI_00453	25.2794	55.8374	-1.1433	0.452723	exuT_1	6.9188e-10	4.0672e-10	TRUE	Hexuronate transporter
LILKMKPI_00454	8.80947	36.8794	-2.0657	0.23887	uxaC	4.5313e-10	2.6898e-10	TRUE	Uronate isomerase
LILKMKPI_00463	35.2379	542.082	-3.9433	0.0650052	fadH	1.6144e-176	9.4904e-176	TRUE	2%2C4-dienoyl-CoA reductase [NADPH]
LILKMKPI_00464	485.67	1182.51	-1.2838	0.410712	patA_1	3.3145e-193	2.1577e-192	TRUE	Putrescine aminotransferase
LILKMKPI_00465	5.36229	36.8794	-2.7819	0.1454	ydeH	7.2471e-12	4.7178e-12	TRUE	Diguanylate cyclase YdeH
LILKMKPI_00466	13.7887	46.3584	-1.7493	0.297446	aer	4.4938e-11	2.8138e-11	TRUE	Aerotaxis receptor
LILKMKPI_00467	11.4906	26.2154	-1.19	0.438303	tsr_1	1.7898e-05	7.6536e-06	TRUE	Methyl-accepting chemotaxis protein I
LILKMKPI_00472	57.4531	365.535	-2.6696	0.15717	ridA	7.0943e-101	2.3092e-100	TRUE	2-iminobutanoate/2-iminopropanoate deaminase
LILKMKPI_00473	2.68114	19.8467	-2.888	0.135091	pyrI	3.7932e-07	1.8616e-07	TRUE	Aspartate carbamoyltransferase regulatory chain
LILKMKPI_00474	29.4926	66.3532	-1.1698	0.444483	pyrB	1.1908e-11	7.6696e-12	TRUE	Aspartate carbamoyltransferase catalytic subunit
LILKMKPI_00476	5.36229	14.0704	-1.3917	0.381115	--	0.00086025	0.00031547	TRUE	hypothetical protein
LILKMKPI_00477	2.29812	15.8478	-2.7858	0.145008	argF_1	6.9939e-06	3.0985e-06	TRUE	Ornithine carbamoyltransferase
LILKMKPI_00478	3.06416	9.18281	-1.5834	0.333695	arcC1	0.0047197	0.0015977	TRUE	Carbamate kinase 1
LILKMKPI_00479	6.51135	15.9959	-1.2967	0.407056	arcA_1	0.00053979	0.00020257	TRUE	Arginine deiminase
LILKMKPI_00480	3.06416	13.1818	-2.105	0.232451	tabA_2	0.00017566	6.9079e-05	TRUE	Toxin-antitoxin biofilm protein TabA
LILKMKPI_00481	208.363	796.387	-1.9344	0.26163	argF_2	2.1996e-176	1.2835e-175	TRUE	Ornithine carbamoyltransferase subunit F
LILKMKPI_00485	21.4491	56.578	-1.3993	0.379113	--	2.1343e-11	1.3558e-11	TRUE	hypothetical protein
LILKMKPI_00486	28.3435	59.3921	-1.0673	0.477211	yjgN	5.5898e-10	3.2982e-10	TRUE	Inner membrane protein YjgN
LILKMKPI_00489	103.799	207.65	-1.0004	0.499861	pepA	9.8029e-30	1.1143e-29	TRUE	Cytosol aminopeptidase
LILKMKPI_00504	2.68114	19.1062	-2.8331	0.14033	ubiG_1	7.1425e-07	3.4327e-07	TRUE	Ubiquinone biosynthesis O-methyltransferase
LILKMKPI_00505	10.7246	38.2123	-1.8331	0.280661	--	1.1807e-09	6.8388e-10	TRUE	hypothetical protein
LILKMKPI_00515	7.66041	31.9917	-2.0622	0.239451	cshA	6.5016e-09	3.6091e-09	TRUE	DEAD-box ATP-dependent RNA helicase CshA
LILKMKPI_00516	28.3435	291.184	-3.3608	0.0973416	--	1.3717e-90	4.0469e-90	TRUE	hypothetical protein
LILKMKPI_00525	5.74531	19.6986	-1.7776	0.291668	cycB	1.5682e-05	6.7391e-06	TRUE	Cyclodextrin-binding protein
LILKMKPI_00528	3.06416	10.3677	-1.7585	0.295555	ganB	0.001803	0.00063716	TRUE	Arabinogalactan endo-beta-1%2C4-galactanase
LILKMKPI_00529	4.59625	10.9601	-1.2537	0.419371	bglY	0.00468	0.0015882	TRUE	Beta-galactosidase BglY
LILKMKPI_00536	19.534	43.9886	-1.1711	0.444083	ascG_1	3.3185e-08	1.7591e-08	TRUE	HTH-type transcriptional regulator AscG
LILKMKPI_00537	36.77	231.792	-2.6562	0.158637	bglF_1	1.808e-64	3.8806e-64	TRUE	PTS system beta-glucoside-specific EIIBCA component
LILKMKPI_00538	19.9171	144.703	-2.861	0.137643	bglH_1	1.3373e-42	2.0065e-42	TRUE	Aryl-phospho-beta-D-glucosidase BglH
LILKMKPI_00541	45.1964	144.555	-1.6773	0.312667	--	2.2646e-30	2.6079e-30	TRUE	--
LILKMKPI_00543	5.74531	23.8457	-2.0533	0.240932	tsr_2	5.6527e-07	2.7469e-07	TRUE	Methyl-accepting chemotaxis protein I
LILKMKPI_00544	34.0888	276.817	-3.0216	0.123142	pleD_1	4.0631e-82	1.1075e-81	TRUE	Response regulator PleD
LILKMKPI_00546	32.1737	65.6127	-1.0281	0.490356	mdoB	1.2789e-10	7.7914e-11	TRUE	Phosphoglycerol transferase I
LILKMKPI_00551	0	6.22061	-4.0216	0.0615712	--	0.0023493	0.00082027	TRUE	hypothetical protein
LILKMKPI_00552	3.83021	36.2869	-3.244	0.10555	yjjP	1.5563e-12	1.0442e-12	TRUE	Inner membrane protein YjjP
LILKMKPI_00555	3.06416	51.5422	-4.0722	0.0594492	proS_1	1.7838e-18	1.5289e-18	TRUE	Proline--tRNA ligase
LILKMKPI_00556	22.5982	63.9835	-1.5015	0.353186	licC_1	2.6307e-13	1.8226e-13	TRUE	Lichenan permease IIC component
LILKMKPI_00600	21.8322	58.2072	-1.4147	0.375088	--	9.0865e-12	5.891e-12	TRUE	hypothetical protein
LILKMKPI_00606	50.1757	103.381	-1.0429	0.485351	thrA	4.932e-16	3.8542e-16	TRUE	Bifunctional aspartokinase/homoserine dehydrogenase 1
LILKMKPI_00607	17.6189	38.9529	-1.1446	0.452315	thrB	2.5519e-07	1.269e-07	TRUE	Homoserine kinase
LILKMKPI_00609	28.3435	60.4288	-1.0922	0.469046	--	2.8092e-10	1.6815e-10	TRUE	hypothetical protein
LILKMKPI_00611	102.649	575.259	-2.4865	0.178439	talB	4.3116e-151	2.136e-150	TRUE	Transaldolase B
LILKMKPI_00621	3.83021	17.3289	-2.1777	0.221028	chiA_1	1.3511e-05	5.8542e-06	TRUE	Chitinase A
LILKMKPI_00630	11.4906	53.1714	-2.2102	0.216104	rihC	1.8458e-14	1.345e-14	TRUE	Non-specific ribonucleoside hydrolase RihC
LILKMKPI_00633	7.66041	53.912	-2.8151	0.142092	manA_1	9.3397e-17	7.4313e-17	TRUE	Mannose-6-phosphate isomerase ManA
LILKMKPI_00634	11.1076	22.5127	-1.0192	0.49339	mngB_1	0.00017385	6.8473e-05	TRUE	Mannosylglycerate hydrolase
LILKMKPI_00641	9.19249	29.4739	-1.6809	0.311888	--	2.2723e-07	1.135e-07	TRUE	hypothetical protein
LILKMKPI_00657	4.59625	23.8457	-2.3752	0.19275	--	1.4945e-07	7.5222e-08	TRUE	hypothetical protein
LILKMKPI_00661	11.8736	74.7955	-2.6552	0.158747	araC	6.0217e-22	5.7916e-22	TRUE	Arabinose operon regulatory protein
LILKMKPI_00667	19.151	190.173	-3.3118	0.100704	--	1.9229e-59	3.825e-59	TRUE	hypothetical protein
LILKMKPI_00669	11.4906	28.289	-1.2998	0.406183	leuD1	4.1105e-06	1.8657e-06	TRUE	3-isopropylmalate dehydratase small subunit 1
LILKMKPI_00674	70.4758	164.846	-1.2259	0.427531	ilvI	1.4758e-27	1.6124e-27	TRUE	Acetolactate synthase isozyme 3 large subunit
LILKMKPI_00675	26.8114	65.6127	-1.2911	0.408639	ilvH	2.619e-12	1.7424e-12	TRUE	Acetolactate synthase isozyme 3 small subunit
LILKMKPI_00676	90.7759	496.168	-2.4504	0.18296	cra_2	2.0161e-129	9.0233e-129	TRUE	Catabolite repressor/activator
LILKMKPI_00681	56.304	183.064	-1.701	0.307573	murE	2.1786e-38	3.0266e-38	TRUE	UDP-N-acetylmuramoyl-L-alanyl-D-glutamate--2%2C6-diaminopimelate ligase
LILKMKPI_00682	56.687	242.012	-2.094	0.23423	murF	5.9931e-58	1.1714e-57	TRUE	UDP-N-acetylmuramoyl-tripeptide--D-alanyl-D-alanine ligase
LILKMKPI_00683	49.7927	127.226	-1.3534	0.391369	mraY	3.5112e-23	3.5099e-23	TRUE	Phospho-N-acetylmuramoyl-pentapeptide-transferase
LILKMKPI_00684	86.1796	330.877	-1.9409	0.260454	murD	1.4006e-74	3.4156e-74	TRUE	UDP-N-acetylmuramoylalanine--D-glutamate ligase
LILKMKPI_00696	14.1718	29.0295	-1.0345	0.488185	yacG	1.8158e-05	7.7566e-06	TRUE	DNA gyrase inhibitor YacG
LILKMKPI_00697	22.9812	97.6044	-2.0865	0.235451	zapD	2.4878e-24	2.5483e-24	TRUE	Cell division protein ZapD
LILKMKPI_00698	57.8361	170.919	-1.5633	0.338376	coaE_1	7.0866e-34	8.9602e-34	TRUE	Dephospho-CoA kinase
LILKMKPI_00723	6.89437	15.6996	-1.1872	0.439154	ylpA_1	0.00091069	0.00033303	TRUE	Lipoprotein YlpA
LILKMKPI_00724	11.1076	35.6945	-1.6842	0.311175	--	1.2004e-08	6.5439e-09	TRUE	hypothetical protein
LILKMKPI_00761	37.919	112.86	-1.5735	0.335992	dgt	4.9378e-23	4.9234e-23	TRUE	Deoxyguanosinetriphosphate triphosphohydrolase
LILKMKPI_00763	78.1362	636.724	-3.0266	0.122716	--	1.6802e-186	1.0421e-185	TRUE	hypothetical protein
LILKMKPI_00764	65.1135	226.756	-1.8001	0.287155	dapD	4.7092e-49	7.9263e-49	TRUE	2%2C3%2C4%2C5-tetrahydropyridine-2%2C6-dicarboxylate N-succinyltransferase
LILKMKPI_00808	104.565	247.343	-1.2421	0.422757	--	6.9099e-41	9.9871e-41	TRUE	hypothetical protein
LILKMKPI_00811	12.6397	35.6945	-1.4977	0.354117	gloB	4.8622e-08	2.5331e-08	TRUE	Hydroxyacylglutathione hydrolase GloB
LILKMKPI_00818	131.759	500.167	-1.9245	0.263432	fadE	4.1452e-111	1.5187e-110	TRUE	Acyl-coenzyme A dehydrogenase
LILKMKPI_00826	65.1135	262.154	-2.0094	0.248376	crl	6.6872e-61	1.3753e-60	TRUE	Sigma factor-binding protein Crl
LILKMKPI_00828	68.9437	151.368	-1.1346	0.455461	proB	4.1964e-24	4.2708e-24	TRUE	Glutamate 5-kinase
LILKMKPI_00829	29.4926	69.9079	-1.2451	0.421879	proA	1.0438e-12	7.0515e-13	TRUE	Gamma-glutamyl phosphate reductase
LILKMKPI_00868	21.4491	239.049	-3.4783	0.0897279	--	9.6148e-76	2.3742e-75	TRUE	hypothetical protein
LILKMKPI_00869	1.53208	9.33092	-2.6065	0.164197	--	0.00071857	0.00026624	TRUE	hypothetical protein
LILKMKPI_00870	1.53208	8.88659	-2.5361	0.172408	rrrD_2	0.0010617	0.00038577	TRUE	Lysozyme RrrD
LILKMKPI_00871	3.83021	11.2564	-1.5552	0.340281	--	0.0018869	0.00066414	TRUE	hypothetical protein
LILKMKPI_00873	3.44718	34.0653	-3.3048	0.101194	--	6.0663e-12	3.9623e-12	TRUE	hypothetical protein
LILKMKPI_00874	3.44718	14.3667	-2.0592	0.239949	--	0.00010149	4.0807e-05	TRUE	hypothetical protein
LILKMKPI_00875	8.04343	25.0306	-1.6378	0.321346	--	2.3135e-06	1.0701e-06	TRUE	hypothetical protein
LILKMKPI_00876	9.57551	40.1378	-2.0675	0.238573	--	7.7101e-11	4.7634e-11	TRUE	hypothetical protein
LILKMKPI_00877	6.89437	17.477	-1.342	0.394473	--	0.00024854	9.6632e-05	TRUE	hypothetical protein
LILKMKPI_00878	6.51135	49.1725	-2.9168	0.132421	--	1.0927e-15	8.4056e-16	TRUE	hypothetical protein
LILKMKPI_00879	2.29812	9.33092	-2.0216	0.246285	--	0.0018554	0.0006542	TRUE	hypothetical protein
LILKMKPI_00880	11.4906	47.5433	-2.0488	0.241685	--	1.682e-12	1.1276e-12	TRUE	hypothetical protein
LILKMKPI_00881	4.97927	22.0684	-2.148	0.225625	--	1.0187e-06	4.8429e-07	TRUE	hypothetical protein
LILKMKPI_00882	2.29812	13.9223	-2.5989	0.165064	--	3.66e-05	1.527e-05	TRUE	hypothetical protein
LILKMKPI_00884	0	7.25738	-4.244	0.0527751	--	0.00094798	0.00034555	TRUE	hypothetical protein
LILKMKPI_00885	4.21323	37.6199	-3.1585	0.111995	--	8.4592e-13	5.7344e-13	TRUE	hypothetical protein
LILKMKPI_00887	2.29812	9.33092	-2.0216	0.246285	--	0.0018554	0.0006542	TRUE	hypothetical protein
LILKMKPI_00889	8.04343	58.6515	-2.8663	0.137138	slt_2	2.9447e-18	2.4995e-18	TRUE	Soluble lytic murein transglycosylase
LILKMKPI_00890	2.29812	22.0684	-3.2635	0.104133	--	3.3802e-08	1.7906e-08	TRUE	hypothetical protein
LILKMKPI_00892	3.44718	17.6251	-2.3541	0.195589	--	6.6877e-06	2.9662e-06	TRUE	hypothetical protein
LILKMKPI_00895	3.44718	27.5484	-2.9985	0.12513	--	1.5099e-09	8.7133e-10	TRUE	hypothetical protein
LILKMKPI_00896	0	6.22061	-3.0216	0.123142	--	0.0040105	0.0013693	TRUE	hypothetical protein
LILKMKPI_00897	2.29812	18.9581	-3.0443	0.12122	--	4.8383e-07	2.3628e-07	TRUE	hypothetical protein
LILKMKPI_00898	11.8736	42.3594	-1.8349	0.280311	--	1.487e-10	9.0241e-11	TRUE	hypothetical protein
LILKMKPI_00908	0	5.03574	-3.3322	0.0992905	--	0.008067	0.0026621	TRUE	hypothetical protein
LILKMKPI_00910	0	5.77629	-3.5301	0.0865633	--	0.0040917	0.0013947	TRUE	hypothetical protein
LILKMKPI_00911	4.59625	18.6618	-2.0216	0.246285	--	1.0741e-05	4.69e-06	TRUE	hypothetical protein
LILKMKPI_00912	8.42645	26.2154	-1.6374	0.321435	pepT_1	1.3381e-06	6.3042e-07	TRUE	Peptidase T
LILKMKPI_00913	6.89437	30.6587	-2.1528	0.224876	dppA_1	8.1301e-09	4.4847e-09	TRUE	Periplasmic dipeptide transport protein
LILKMKPI_00927	11.8736	55.0969	-2.2142	0.215506	--	6.0374e-15	4.4992e-15	TRUE	hypothetical protein
LILKMKPI_00929	22.2152	80.4237	-1.8561	0.276222	lacI_2	7.6862e-19	6.69e-19	TRUE	Lactose operon repressor
LILKMKPI_00930	11.8736	30.5106	-1.3616	0.38915	lacZ_1	1.1315e-06	5.3629e-07	TRUE	Beta-galactosidase
LILKMKPI_00947	2.68114	48.58	-4.1794	0.0551919	metQ_2	1.3514e-17	1.1241e-17	TRUE	Methionine-binding lipoprotein MetQ
LILKMKPI_00948	26.0454	164.994	-2.6633	0.157858	--	1.7704e-46	2.8461e-46	TRUE	--
LILKMKPI_00954	43.6643	91.68	-1.0702	0.476253	--	1.2306e-14	9.0677e-15	TRUE	hypothetical protein
LILKMKPI_00960	6.12833	15.8478	-1.3707	0.386704	nudK_1	0.00043695	0.0001654	TRUE	GDP-mannose pyrophosphatase NudK
LILKMKPI_00962	29.8756	122.635	-2.0373	0.243619	--	1.1109e-29	1.2591e-29	TRUE	hypothetical protein
LILKMKPI_00965	11.4906	42.5075	-1.8873	0.270312	hokB_2	8.9769e-11	5.52e-11	TRUE	Toxin HokB
LILKMKPI_00967	22.2152	45.766	-1.0427	0.485418	cydA_1	6.7515e-08	3.4828e-08	TRUE	Cytochrome bd ubiquinol oxidase subunit 1
LILKMKPI_00969	57.0701	117.451	-1.0413	0.485889	--	5.4903e-18	4.6155e-18	TRUE	--
LILKMKPI_00978	106.48	743.067	-2.8029	0.143299	pncC_1	1.0788e-208	7.5205e-208	TRUE	Nicotinamide-nucleotide amidohydrolase PncC
LILKMKPI_00981	13.7887	40.7302	-1.5626	0.33854	ampH	3.189e-09	1.8053e-09	TRUE	D-alanyl-D-alanine-carboxypeptidase/endopeptidase AmpH
LILKMKPI_00990	22.2152	129.448	-2.5428	0.171609	iraP_1	7.0525e-36	9.228e-36	TRUE	Anti-adapter protein IraP
LILKMKPI_00993	65.1135	243.345	-1.902	0.267572	proC	1.4462e-54	2.6996e-54	TRUE	Pyrroline-5-carboxylate reductase
LILKMKPI_00994	13.4057	88.2735	-2.7191	0.151869	--	6.0532e-26	6.4261e-26	TRUE	hypothetical protein
LILKMKPI_00995	3.83021	23.2533	-2.6019	0.164721	--	9.4635e-08	4.8311e-08	TRUE	hypothetical protein
LILKMKPI_01019	75.072	183.804	-1.2918	0.408441	tsx	1.0868e-31	1.2971e-31	TRUE	Nucleoside-specific channel-forming protein tsx
LILKMKPI_01020	5.36229	26.5117	-2.3057	0.202262	yajI	4.1117e-08	2.1607e-08	TRUE	putative lipoprotein YajI
LILKMKPI_01040	270.796	583.997	-1.1088	0.46368	cyoA	1.3019e-86	3.7157e-86	TRUE	Cytochrome bo(3) ubiquinol oxidase subunit 2
LILKMKPI_01041	22.9812	87.681	-1.9318	0.262102	hscC_1	6.0336e-21	5.5849e-21	TRUE	Chaperone protein HscC
LILKMKPI_01042	10.7246	43.5443	-2.0216	0.246285	--	1.7713e-11	1.1288e-11	TRUE	hypothetical protein
LILKMKPI_01050	128.695	829.712	-2.6887	0.155103	hupB	2.1674e-227	1.6106e-226	TRUE	DNA-binding protein HU-beta
LILKMKPI_01052	21.8322	129.004	-2.5629	0.169235	comEA	6.334e-36	8.3156e-36	TRUE	ComE operon protein 1
LILKMKPI_01053	29.4926	246.307	-3.062	0.119742	fadM	9.4176e-74	2.2617e-73	TRUE	Long-chain acyl-CoA thioesterase FadM
LILKMKPI_01076	0	5.33196	-2.7992	0.143667	ygbT	0.0090506	0.0029681	TRUE	CRISPR-associated endonuclease Cas1
LILKMKPI_01086	23.3643	117.007	-2.3242	0.199685	ylaB_1	6.9313e-31	8.0647e-31	TRUE	Putative cyclic-di-GMP phosphodiesterase YlaB
LILKMKPI_01097	181.552	507.128	-1.482	0.357992	acrB_1	2.7694e-93	8.3263e-93	TRUE	Multidrug efflux pump subunit AcrB
LILKMKPI_01098	127.546	439.738	-1.7856	0.290055	acrA	7.1685e-93	2.1389e-92	TRUE	Multidrug efflux pump subunit AcrA
LILKMKPI_01101	3.44718	12.7374	-1.8856	0.270631	--	0.00038846	0.00014761	TRUE	hypothetical protein
LILKMKPI_01102	13.4057	38.6567	-1.5279	0.346782	priC	1.0613e-08	5.8094e-09	TRUE	Primosomal replication protein N''
LILKMKPI_01113	64.7305	206.909	-1.6765	0.312841	htpG_1	1.0119e-42	1.5272e-42	TRUE	Chaperone protein HtpG
LILKMKPI_01121	31.7907	133.595	-2.0712	0.237961	mggB	1.5527e-32	1.9022e-32	TRUE	Mannosylglucosyl-3-phosphoglycerate phosphatase
LILKMKPI_01122	37.536	84.867	-1.1769	0.442301	ybaK	1.5106e-14	1.1069e-14	TRUE	Cys-tRNA(Pro)/Cys-tRNA(Cys) deacylase YbaK
LILKMKPI_01142	137.887	713.741	-2.3719	0.193191	ppiB	1.5233e-181	9.2302e-181	TRUE	Peptidyl-prolyl cis-trans isomerase B
LILKMKPI_01151	34.8549	134.039	-1.9432	0.260039	--	2.7786e-31	3.2864e-31	TRUE	hypothetical protein
LILKMKPI_01155	29.8756	86.0518	-1.5262	0.347191	--	1.4399e-17	1.1939e-17	TRUE	hypothetical protein
LILKMKPI_01156	51.3247	223.942	-2.1254	0.229187	--	2.7249e-54	5.0504e-54	TRUE	hypothetical protein
LILKMKPI_01159	6.51135	14.3667	-1.1417	0.453225	--	0.0017661	0.00062495	TRUE	hypothetical protein
LILKMKPI_01161	7.66041	21.0316	-1.4571	0.364225	--	3.3947e-05	1.4231e-05	TRUE	hypothetical protein
LILKMKPI_01167	4.21323	21.1797	-2.3297	0.198925	--	8.6554e-07	4.1371e-07	TRUE	hypothetical protein
LILKMKPI_01172	24.5133	51.3941	-1.068	0.47698	--	7.9048e-09	4.3696e-09	TRUE	hypothetical protein
LILKMKPI_01184	2.29812	9.62714	-2.0667	0.238705	--	0.0014432	0.00051579	TRUE	hypothetical protein
LILKMKPI_01189	20.3001	69.7598	-1.7809	0.291002	--	4.1863e-16	3.2877e-16	TRUE	--
LILKMKPI_01199	18.002	229.422	-3.6718	0.0784654	ybdO_1	3.297e-74	8.0156e-74	TRUE	putative HTH-type transcriptional regulator YbdO
LILKMKPI_01202	127.163	1797.91	-3.8216	0.0707268	uspG	0	0	TRUE	Universal stress protein UP12
LILKMKPI_01205	37.153	76.5728	-1.0434	0.485183	ygbN	2.8796e-12	1.9142e-12	TRUE	Inner membrane permease YgbN
LILKMKPI_01206	4.21323	154.775	-5.1991	0.0272217	--	3.2597e-53	5.9713e-53	TRUE	putative ABC transporter-binding protein
LILKMKPI_01207	8.42645	99.2336	-3.5578	0.0849172	sugA	9.5851e-33	1.1853e-32	TRUE	Trehalose transport system permease protein SugA
LILKMKPI_01208	3.06416	25.623	-3.0639	0.119584	sugB	4.6244e-09	2.5908e-09	TRUE	Trehalose transport system permease protein SugB
LILKMKPI_01209	4.97927	41.767	-3.0684	0.119212	malK_2	7.1755e-14	5.0921e-14	TRUE	Maltose/maltodextrin import ATP-binding protein MalK
LILKMKPI_01212	3.83021	20.4392	-2.4158	0.187401	--	1.0084e-06	4.7966e-07	TRUE	hypothetical protein
LILKMKPI_01214	5.36229	55.5412	-3.3726	0.0965487	dcuD	1.1332e-18	9.7983e-19	TRUE	Putative cryptic C4-dicarboxylate transporter DcuD
LILKMKPI_01234	353.145	754.768	-1.0958	0.467877	--	1.939e-110	7.0387e-110	TRUE	hypothetical protein
LILKMKPI_01237	6.89437	21.1797	-1.6192	0.325516	yecS_1	1.5117e-05	6.5142e-06	TRUE	L-cystine transport system permease protein YecS
LILKMKPI_01238	57.8361	434.851	-2.9105	0.133	gltI	1.8134e-125	7.5981e-125	TRUE	Glutamate/aspartate import solute-binding protein
LILKMKPI_01242	193.042	393.528	-1.0275	0.490559	--	7.4114e-56	1.4034e-55	TRUE	PhoH-like protein
LILKMKPI_01257	33.7058	104.269	-1.6292	0.323267	nagB	6.3939e-22	6.1346e-22	TRUE	Glucosamine-6-phosphate deaminase
LILKMKPI_01258	55.921	117.895	-1.076	0.474342	nagE	1.8831e-18	1.6106e-18	TRUE	PTS system N-acetylglucosamine-specific EIICBA component
LILKMKPI_01261	4.21323	9.0347	-1.1006	0.466323	chiP	0.014435	0.0045796	TRUE	Chitoporin
LILKMKPI_01262	13.4057	29.622	-1.1438	0.452566	chb	7.0156e-06	3.1064e-06	TRUE	Chitobiase
LILKMKPI_01270	8.80947	153.738	-4.1253	0.0573008	potE	5.6263e-52	9.9592e-52	TRUE	Putrescine transporter PotE
LILKMKPI_01271	4.21323	168.993	-5.3259	0.0249313	speF	8.5865e-58	1.6742e-57	TRUE	Inducible ornithine decarboxylase
LILKMKPI_01272	5.74531	16.8845	-1.5552	0.340281	kdpE	0.00014131	5.6131e-05	TRUE	KDP operon transcriptional regulatory protein KdpE
LILKMKPI_01273	12.2567	32.5842	-1.4106	0.376155	kdpD	3.4462e-07	1.6977e-07	TRUE	Sensor protein KdpD
LILKMKPI_01276	4.21323	14.5148	-1.7845	0.290277	kdpA	0.00020519	8.0255e-05	TRUE	Potassium-transporting ATPase potassium-binding subunit
LILKMKPI_01280	53.2399	117.451	-1.1415	0.453288	ybgI	3.874e-19	3.4173e-19	TRUE	GTP cyclohydrolase 1 type 2
LILKMKPI_01281	22.5982	76.1285	-1.7522	0.296849	kipI	3.015e-17	2.4739e-17	TRUE	Kinase A inhibitor
LILKMKPI_01282	30.2586	87.681	-1.5349	0.345103	kipA	6.106e-18	5.1167e-18	TRUE	KipI antagonist
LILKMKPI_01283	39.0681	94.9384	-1.281	0.41151	--	4.7935e-17	3.8887e-17	TRUE	hypothetical protein
LILKMKPI_01284	47.4945	100.122	-1.0759	0.474375	--	6.6857e-16	5.1886e-16	TRUE	hypothetical protein
LILKMKPI_01287	9.95853	21.7722	-1.1285	0.457391	--	0.00012665	5.0489e-05	TRUE	hypothetical protein
LILKMKPI_01289	141.718	1428.52	-3.3334	0.099208	gltA	0	0	TRUE	Citrate synthase
LILKMKPI_01290	144.016	502.389	-1.8026	0.286658	sdhC	1.5118e-106	5.2927e-106	TRUE	Succinate dehydrogenase cytochrome b556 subunit
LILKMKPI_01291	42.5153	98.7893	-1.2164	0.430355	sdhD	4.6251e-17	3.7629e-17	TRUE	Succinate dehydrogenase hydrophobic membrane anchor subunit
LILKMKPI_01292	214.108	1056.47	-2.3028	0.202669	sdhA	1.0695e-262	9.0588e-262	TRUE	Succinate dehydrogenase flavoprotein subunit
LILKMKPI_01293	77.7532	473.211	-2.6055	0.164311	sdhB	3.4365e-128	1.4792e-127	TRUE	Succinate dehydrogenase iron-sulfur subunit
LILKMKPI_01294	301.82	1722.96	-2.5131	0.175179	sucA	0	0	TRUE	2-oxoglutarate dehydrogenase E1 component
LILKMKPI_01295	194.574	741.734	-1.9306	0.26232	sucB	3.4426e-164	1.8574e-163	TRUE	Dihydrolipoyllysine-residue succinyltransferase component of 2-oxoglutarate dehydrogenase complex
LILKMKPI_01296	136.738	398.712	-1.5439	0.342957	sucC	5.6076e-76	1.389e-75	TRUE	Succinate--CoA ligase [ADP-forming] subunit beta
LILKMKPI_01297	71.6248	149.887	-1.0653	0.477873	sucD	7.15e-23	7.0489e-23	TRUE	Succinate--CoA ligase [ADP-forming] subunit alpha
LILKMKPI_01298	8.04343	23.6976	-1.5589	0.33941	mngR_2	6.4001e-06	2.8467e-06	TRUE	Mannosyl-D-glycerate transport/metabolism system repressor MngR
LILKMKPI_01301	112.608	1501.09	-3.7366	0.075019	cydA_2	0	0	TRUE	Cytochrome bd-I ubiquinol oxidase subunit 1
LILKMKPI_01302	91.9249	1031.88	-3.4887	0.0890834	cydB_2	0	0	TRUE	Cytochrome bd-I ubiquinol oxidase subunit 2
LILKMKPI_01304	4.97927	26.0673	-2.3882	0.191021	--	3.7516e-08	1.9767e-08	TRUE	hypothetical protein
LILKMKPI_01322	469.583	1234.2	-1.3941	0.380482	gpmA	2.6747e-214	1.933e-213	TRUE	2%2C3-bisphosphoglycerate-dependent phosphoglycerate mutase
LILKMKPI_01323	83.8815	259.933	-1.6317	0.322708	galM_1	3.3843e-52	6.045e-52	TRUE	Aldose 1-epimerase
LILKMKPI_01334	194.957	463.584	-1.2497	0.420536	pgl	2.1065e-75	5.1693e-75	TRUE	6-phosphogluconolactonase
LILKMKPI_01351	137.504	348.651	-1.3423	0.394391	ybhL	3.2767e-60	6.6352e-60	TRUE	Inner membrane protein YbhL
LILKMKPI_01356	43.2813	142.185	-1.716	0.304392	ybhQ	2.2293e-30	2.5711e-30	TRUE	Inner membrane protein YbhQ
LILKMKPI_01357	20.6831	58.6515	-1.5037	0.352648	ybhR	2.4763e-12	1.6516e-12	TRUE	Inner membrane transport permease YbhR
LILKMKPI_01358	18.768	39.9897	-1.0914	0.469306	ybhS	2.8862e-07	1.4299e-07	TRUE	Inner membrane transport permease YbhS
LILKMKPI_01359	39.4511	139.223	-1.8193	0.283358	ybhF	5.2529e-31	6.1573e-31	TRUE	putative ABC transporter ATP-binding protein YbhF
LILKMKPI_01360	27.1945	84.2745	-1.6318	0.322685	emrA_1	4.8765e-18	4.1083e-18	TRUE	Multidrug export protein EmrA
LILKMKPI_01361	28.7265	77.0171	-1.4228	0.372988	ybiH	3.7792e-15	2.8378e-15	TRUE	putative HTH-type transcriptional regulator YbiH
LILKMKPI_01363	8.80947	34.9539	-1.9883	0.252036	bglH_2	2.1097e-09	1.2104e-09	TRUE	Aryl-phospho-beta-D-glucosidase BglH
LILKMKPI_01364	10.3416	36.7312	-1.8286	0.281538	bglH_3	2.547e-09	1.4507e-09	TRUE	Aryl-phospho-beta-D-glucosidase BglH
LILKMKPI_01366	13.7887	106.935	-2.9552	0.128943	licT	1.8658e-32	2.2786e-32	TRUE	Transcription antiterminator LicT
LILKMKPI_01373	32.5567	146.333	-2.1682	0.222488	trpD	1.4919e-36	1.9918e-36	TRUE	Anthranilate phosphoribosyltransferase
LILKMKPI_01376	10.7246	25.0306	-1.2228	0.42845	--	2.2922e-05	9.7335e-06	TRUE	hypothetical protein
LILKMKPI_01381	73.923	201.429	-1.4462	0.366987	glnH_1	1.7913e-37	2.454e-37	TRUE	Glutamine-binding periplasmic protein
LILKMKPI_01400	34.8549	168.549	-2.2737	0.206799	gsiA_1	3.8896e-43	5.9148e-43	TRUE	Glutathione import ATP-binding protein GsiA
LILKMKPI_01401	16.8529	94.1979	-2.4827	0.178909	gsiB_1	3.3698e-26	3.5919e-26	TRUE	Glutathione-binding protein GsiB
LILKMKPI_01402	7.66041	21.1797	-1.4672	0.361684	gsiC_1	3.0377e-05	1.2782e-05	TRUE	Glutathione transport system permease protein GsiC
LILKMKPI_01403	11.4906	30.955	-1.4297	0.371208	gsiD_1	5.9342e-07	2.8819e-07	TRUE	Glutathione transport system permease protein GsiD
LILKMKPI_01412	14.9378	37.1756	-1.3154	0.401814	ybjI	1.1359e-07	5.758e-08	TRUE	5-amino-6-(5-phospho-D-ribitylamino)uracil phosphatase YbjI
LILKMKPI_01422	50.5587	127.374	-1.333	0.396942	potF	5.8165e-23	5.7704e-23	TRUE	Putrescine-binding periplasmic protein
LILKMKPI_01435	81.2003	317.696	-1.9681	0.255589	artI	2.2439e-72	5.3399e-72	TRUE	Putative ABC transporter arginine-binding protein 2
LILKMKPI_01437	111.459	486.985	-2.1274	0.22887	ybjP	6.0241e-116	2.3035e-115	TRUE	putative lipoprotein YbjP
LILKMKPI_01438	29.4926	110.638	-1.9074	0.266573	--	8.6758e-26	9.1855e-26	TRUE	hypothetical protein
LILKMKPI_01439	31.4077	87.2367	-1.4738	0.360033	amiD	2.276e-17	1.8753e-17	TRUE	N-acetylmuramoyl-L-alanine amidase AmiD
LILKMKPI_01441	55.921	129.596	-1.2126	0.43149	ltaE	7.6096e-22	7.2656e-22	TRUE	Low specificity L-threonine aldolase
LILKMKPI_01442	83.8815	259.637	-1.6301	0.323066	poxB	4.2128e-52	7.5078e-52	TRUE	Pyruvate dehydrogenase [ubiquinone]
LILKMKPI_01446	45.9625	221.424	-2.2683	0.207574	recF_2	5.0162e-56	9.5211e-56	TRUE	DNA replication and repair protein RecF
LILKMKPI_01450	32.9398	1054.25	-5.0002	0.0312457	cspD	0	0	TRUE	Cold shock-like protein CspD
LILKMKPI_01451	51.7078	106.787	-1.0463	0.484208	clpS	1.5123e-16	1.1925e-16	TRUE	ATP-dependent Clp protease adapter protein ClpS
LILKMKPI_01458	247.814	579.258	-1.2249	0.427827	lrp	2.1792e-92	6.4775e-92	TRUE	Leucine-responsive regulatory protein
LILKMKPI_01465	1304.57	3762.73	-1.5282	0.34671	pflB	0	0	TRUE	Formate acetyltransferase 1
LILKMKPI_01468	12.2567	69.0192	-2.4934	0.177587	--	1.1298e-19	1.0079e-19	TRUE	hypothetical protein
LILKMKPI_01473	1141.78	2767.43	-1.2773	0.412567	ihfB	0	0	TRUE	Integration host factor subunit beta
LILKMKPI_01482	78.9022	229.126	-1.538	0.344363	--	2.6364e-44	4.0561e-44	TRUE	hypothetical protein
LILKMKPI_01488	179.254	441.812	-1.3014	0.405732	--	4.1043e-74	9.9476e-74	TRUE	hypothetical protein
LILKMKPI_01491	88.8608	603.696	-2.7642	0.147195	aspC	1.2604e-168	6.9915e-168	TRUE	Aspartate aminotransferase
LILKMKPI_01492	52.8568	1156.74	-4.4518	0.0456956	ompF	0	0	TRUE	Outer membrane protein F
LILKMKPI_01502	174.274	352.057	-1.0144	0.495034	zapC	1.0437e-49	1.7873e-49	TRUE	Cell division protein ZapC
LILKMKPI_01512	2701.83	11050.3	-2.0321	0.244499	ompA	0	0	TRUE	Outer membrane protein A
LILKMKPI_01514	11.4906	65.1683	-2.5037	0.176324	tfoX1	1.0458e-18	9.0626e-19	TRUE	DNA transformation protein TfoX1
LILKMKPI_01517	44.4304	131.818	-1.5689	0.337065	helD	1.4192e-26	1.5251e-26	TRUE	DNA helicase IV
LILKMKPI_01518	29.4926	82.9415	-1.4917	0.355593	mgsA	9.9888e-17	7.9397e-17	TRUE	Methylglyoxal synthase
LILKMKPI_01522	47.8776	119.377	-1.3181	0.401063	yccX	1.8824e-21	1.7779e-21	TRUE	Acylphosphatase
LILKMKPI_01525	13.7887	141.741	-3.3617	0.0972809	oppA_1	4.8864e-45	7.6219e-45	TRUE	Periplasmic oligopeptide-binding protein
LILKMKPI_01542	62.4323	134.78	-1.1102	0.46323	rutR	2.5558e-21	2.3938e-21	TRUE	HTH-type transcriptional regulator RutR
LILKMKPI_01543	32.9398	484.467	-3.8785	0.0679916	putA	3.0302e-157	1.54e-156	TRUE	Bifunctional protein PutA
LILKMKPI_01546	6.89437	19.2543	-1.4817	0.358067	nupC_1	6.5737e-05	2.6927e-05	TRUE	Nucleoside permease NupC
LILKMKPI_01549	19.9171	47.3952	-1.2507	0.420244	efeB	4.1983e-09	2.3571e-09	TRUE	Deferrochelatase/peroxidase EfeB
LILKMKPI_01551	4.59625	13.9223	-1.5989	0.330129	--	0.00047989	0.00018096	TRUE	hypothetical protein
LILKMKPI_01570	111.842	386.271	-1.7881	0.289553	--	6.8555e-82	1.8621e-81	TRUE	hypothetical protein
LILKMKPI_01582	19.534	53.912	-1.4646	0.362336	ydaF_1	2.937e-11	1.8493e-11	TRUE	Putative ribosomal N-acetyltransferase YdaF
LILKMKPI_01583	17.2359	48.4319	-1.4905	0.355889	--	2.2353e-10	1.343e-10	TRUE	hypothetical protein
LILKMKPI_01584	22.2152	79.9793	-1.8481	0.277758	yceM	1.0829e-18	9.3733e-19	TRUE	Putative oxidoreductase YceM
LILKMKPI_01594	1.9151	9.77525	-2.3517	0.195915	flgG	0.00080032	0.00029514	TRUE	Flagellar basal-body rod protein FlgG
LILKMKPI_01598	11.8736	68.4268	-2.5268	0.173523	flgK	1.1493e-19	1.0242e-19	TRUE	Flagellar hook-associated protein 1
LILKMKPI_01599	11.1076	32.1398	-1.5328	0.345606	flgL	1.7653e-07	8.8683e-08	TRUE	Flagellar hook-associated protein 3
LILKMKPI_01602	386.085	970.416	-1.3297	0.397851	rne	4.3447e-163	2.2969e-162	TRUE	Ribonuclease E
LILKMKPI_01604	86.9457	230.015	-1.4035	0.378011	--	1.2217e-41	1.7887e-41	TRUE	hypothetical protein
LILKMKPI_01612	628.154	1671.27	-1.4118	0.375842	acpP	3.0992e-292	3.0139e-291	TRUE	Acyl carrier protein
LILKMKPI_01618	44.4304	215.352	-2.2771	0.206312	ycfH	1.1285e-54	2.1114e-54	TRUE	putative metal-dependent hydrolase YcfH
LILKMKPI_01621	50.9417	371.904	-2.868	0.136976	hinT	9.3281e-107	3.2803e-106	TRUE	Purine nucleoside phosphoramidase
LILKMKPI_01622	20.6831	62.6505	-1.5989	0.330129	--	1.29e-13	9.0727e-14	TRUE	hypothetical protein
LILKMKPI_01626	62.0493	225.423	-1.8611	0.275266	--	6.3524e-50	1.0949e-49	TRUE	hypothetical protein
LILKMKPI_01642	44.4304	263.487	-2.5681	0.168626	pepT_2	1.2985e-71	3.0441e-71	TRUE	Peptidase T
LILKMKPI_01652	301.054	1259.97	-2.0653	0.238937	icd	6.9608e-291	6.6867e-290	TRUE	Isocitrate dehydrogenase [NADP]
LILKMKPI_01661	62.0493	165.735	-1.4174	0.374386	--	1.0829e-30	1.2526e-30	TRUE	hypothetical protein
LILKMKPI_01666	11.4906	103.381	-3.1694	0.111152	--	1.7285e-32	2.1142e-32	TRUE	hypothetical protein
LILKMKPI_01667	14.9378	109.305	-2.8713	0.136664	--	1.1679e-32	1.4397e-32	TRUE	hypothetical protein
LILKMKPI_01672	9.57551	33.6209	-1.8119	0.284816	--	1.3334e-08	7.2438e-09	TRUE	hypothetical protein
LILKMKPI_01674	53.6229	136.113	-1.3439	0.393954	ylaB_2	1.449e-24	1.494e-24	TRUE	Putative cyclic-di-GMP phosphodiesterase YlaB
LILKMKPI_01675	375.743	1034.1	-1.4606	0.363342	--	3.42e-186	2.1047e-185	TRUE	--
LILKMKPI_01676	1239.45	3424.74	-1.4663	0.361909	--	0	0	TRUE	hypothetical protein
LILKMKPI_01685	135.206	352.798	-1.3837	0.383235	ydjA	2.8726e-62	6.0341e-62	TRUE	Putative NAD(P)H nitroreductase YdjA
LILKMKPI_01699	27.1945	66.6494	-1.2933	0.408017	yddG	1.7104e-12	1.1447e-12	TRUE	Methyl viologen resistance protein YddG
LILKMKPI_01700	86.5626	230.311	-1.4118	0.375842	nadE	7.2424e-42	1.0683e-41	TRUE	NH(3)-dependent NAD(+) synthetase
LILKMKPI_01701	2659.31	5656.02	-1.0887	0.470185	osmE	0	0	TRUE	Osmotically-inducible putative lipoprotein OsmE
LILKMKPI_01706	15.7038	41.1745	-1.3906	0.381406	kduD_1	1.2029e-08	6.5526e-09	TRUE	2-dehydro-3-deoxy-D-gluconate 5-dehydrogenase
LILKMKPI_01707	26.0454	78.9426	-1.5998	0.329923	yniC	9.0603e-17	7.2309e-17	TRUE	2-deoxyglucose-6-phosphate phosphatase
LILKMKPI_01731	13.4057	43.9886	-1.7143	0.30475	mepS_1	1.9055e-10	1.1528e-10	TRUE	Murein DD-endopeptidase MepS/Murein LD-carboxypeptidase
LILKMKPI_01738	31.0247	308.957	-3.3159	0.100419	ppsR	1.8584e-95	5.7184e-95	TRUE	Phosphoenolpyruvate synthase regulatory protein
LILKMKPI_01739	755.316	1643.72	-1.1218	0.45952	ppsA	2.133e-242	1.6802e-241	TRUE	Phosphoenolpyruvate synthase
LILKMKPI_01753	2380.47	22201.5	-3.2213	0.107224	lpp	0	0	TRUE	Major outer membrane lipoprotein Lpp
LILKMKPI_01763	25.2794	161.144	-2.6723	0.156876	fhlA	1.6046e-45	2.5432e-45	TRUE	Formate hydrogenlyase transcriptional activator FhlA
LILKMKPI_01764	4.21323	16.8845	-2.0027	0.249533	hypE	3.0048e-05	1.2657e-05	TRUE	Hydrogenase isoenzymes formation protein HypE
LILKMKPI_01790	35.6209	114.933	-1.69	0.309927	--	1.3008e-24	1.3447e-24	TRUE	hypothetical protein
LILKMKPI_01798	5.36229	22.3646	-2.0603	0.239766	--	1.2308e-06	5.8192e-07	TRUE	hypothetical protein
LILKMKPI_01800	2.68114	7.84982	-1.5498	0.341557	vgrG1_4	0.0095525	0.0031145	TRUE	Actin cross-linking toxin VgrG1
LILKMKPI_01811	4.59625	11.4045	-1.3111	0.403013	licC_3	0.0033482	0.0011542	TRUE	Lichenan permease IIC component
LILKMKPI_01812	162.784	335.469	-1.0432	0.48525	cfa	2.1653e-48	3.606e-48	TRUE	Cyclopropane-fatty-acyl-phospholipid synthase
LILKMKPI_01818	54.7719	385.678	-2.8159	0.142014	mepH	1.4966e-109	5.4079e-109	TRUE	Murein DD-endopeptidase MepH
LILKMKPI_01821	61.6663	218.758	-1.8268	0.281889	gloA	7.1011e-48	1.1678e-47	TRUE	Lactoylglutathione lyase
LILKMKPI_01825	13.4057	49.7649	-1.8923	0.269377	--	2.1935e-12	1.4655e-12	TRUE	hypothetical protein
LILKMKPI_01826	38.6851	169.734	-2.1334	0.22792	ydhF	1.1137e-41	1.6336e-41	TRUE	Oxidoreductase YdhF
LILKMKPI_01827	452.73	1019.44	-1.1711	0.444083	sodC	6.8779e-156	3.4729e-155	TRUE	Superoxide dismutase [Cu-Zn]
LILKMKPI_01831	158.57	391.306	-1.3032	0.405226	slyA_2	6.4693e-66	1.4274e-65	TRUE	Transcriptional regulator SlyA
LILKMKPI_01832	139.419	287.037	-1.0418	0.485721	slyB	1.2848e-41	1.8776e-41	TRUE	Outer membrane lipoprotein SlyB
LILKMKPI_01835	23.7473	82.7934	-1.8018	0.286817	pdxH	5.6889e-19	4.9791e-19	TRUE	Pyridoxine/pyridoxamine 5'-phosphate oxidase
LILKMKPI_01838	154.74	620.728	-2.0041	0.249291	gstA	2.3166e-141	1.0927e-140	TRUE	Glutathione S-transferase GstA
LILKMKPI_01850	44.4304	92.2725	-1.0544	0.481497	--	1.4086e-14	1.037e-14	TRUE	hypothetical protein
LILKMKPI_01853	10.7246	24.1419	-1.1706	0.444237	malX	4.2873e-05	1.7775e-05	TRUE	PTS system maltose-specific EIICB component
LILKMKPI_01857	38.6851	253.564	-2.7125	0.152565	fumA	3.4166e-71	7.9155e-71	TRUE	Fumarate hydratase class I%2C aerobic
LILKMKPI_01866	136.355	323.768	-1.2476	0.421148	--	3.8083e-53	6.9601e-53	TRUE	hypothetical protein
LILKMKPI_01867	92.691	297.108	-1.6805	0.311974	pntA	1.1298e-60	2.3177e-60	TRUE	NAD(P) transhydrogenase subunit alpha
LILKMKPI_01868	96.5212	209.427	-1.1175	0.460892	pntB	2.2726e-32	2.7668e-32	TRUE	NAD(P) transhydrogenase subunit beta
LILKMKPI_01873	53.2399	142.926	-1.4247	0.372497	ybiV	8.5847e-27	9.2633e-27	TRUE	Sugar phosphatase YbiV
LILKMKPI_01889	32.5567	75.3879	-1.2114	0.431849	spuE	2.4246e-13	1.6902e-13	TRUE	Spermidine-binding periplasmic protein SpuE
LILKMKPI_01890	11.4906	50.0611	-2.1232	0.229537	potA_3	2.2514e-13	1.5708e-13	TRUE	Spermidine/putrescine import ATP-binding protein PotA
LILKMKPI_01891	9.19249	21.4759	-1.2242	0.428035	ydcU	8.7136e-05	3.5307e-05	TRUE	Inner membrane ABC transporter permease protein YdcU
LILKMKPI_01892	4.97927	15.8478	-1.6703	0.314188	ydcV_3	0.00015297	6.052e-05	TRUE	Inner membrane ABC transporter permease protein YdcV
LILKMKPI_01893	40.6002	204.244	-2.3307	0.198788	prr	1.0199e-52	1.8448e-52	TRUE	Gamma-aminobutyraldehyde dehydrogenase
LILKMKPI_01894	1.14906	13.0337	-3.5037	0.088162	--	1.6595e-05	7.1197e-06	TRUE	hypothetical protein
LILKMKPI_01895	5.74531	11.9969	-1.0622	0.478901	phnO	0.0053969	0.0018113	TRUE	Aminoalkylphosphonate N-acetyltransferase
LILKMKPI_01896	8.80947	19.5505	-1.1501	0.450594	--	0.00025449	9.8654e-05	TRUE	hypothetical protein
LILKMKPI_01898	78.1362	291.48	-1.8993	0.268073	--	6.1373e-65	1.3318e-64	TRUE	hypothetical protein
LILKMKPI_01908	22.5982	196.69	-3.1216	0.114896	--	8.1979e-60	1.6431e-59	TRUE	hypothetical protein
LILKMKPI_01911	12.6397	31.1031	-1.2991	0.40638	--	1.3762e-06	6.4721e-07	TRUE	hypothetical protein
LILKMKPI_01912	36.0039	73.7587	-1.0347	0.488117	dppA_2	8.3155e-12	5.4044e-12	TRUE	Periplasmic dipeptide transport protein
LILKMKPI_01920	11.8736	44.5811	-1.9087	0.266332	--	2.6222e-11	1.659e-11	TRUE	--
LILKMKPI_01921	19.9171	72.1295	-1.8566	0.276126	--	4.6289e-17	3.7629e-17	TRUE	hypothetical protein
LILKMKPI_01922	8.80947	26.0673	-1.5651	0.337954	gsiC_2	2.1365e-06	9.9289e-07	TRUE	Glutathione transport system permease protein GsiC
LILKMKPI_01923	4.59625	10.0715	-1.1317	0.456378	gsiD_2	0.0090632	0.0029685	TRUE	Glutathione transport system permease protein GsiD
LILKMKPI_01924	22.5982	119.525	-2.403	0.189071	gsiB_3	3.6616e-32	4.4374e-32	TRUE	Glutathione-binding protein GsiB
LILKMKPI_01925	11.1076	171.363	-3.9474	0.0648208	mcbR	4.0402e-57	7.8002e-57	TRUE	HTH-type transcriptional regulator McbR
LILKMKPI_01926	3.44718	10.6639	-1.6292	0.323267	--	0.0020884	0.00073211	TRUE	hypothetical protein
LILKMKPI_01930	152.442	328.656	-1.1083	0.46384	treS	1.5962e-49	2.7098e-49	TRUE	Trehalose synthase/amylase TreS
LILKMKPI_01933	36.3869	78.3501	-1.1065	0.464419	fecA	5.2588e-13	3.599e-13	TRUE	Fe(3+) dicitrate transport protein FecA
LILKMKPI_01951	1.9151	11.2564	-2.5552	0.170141	--	0.00022179	8.6489e-05	TRUE	hypothetical protein
LILKMKPI_01955	9.95853	31.3993	-1.6567	0.317164	--	1.0759e-07	5.457e-08	TRUE	--
LILKMKPI_01957	32.9398	170.919	-2.3754	0.192723	uvsE	6.2222e-45	9.6672e-45	TRUE	UV DNA damage endonuclease
LILKMKPI_01961	44.4304	108.565	-1.2889	0.409263	--	2.3727e-19	2.1e-19	TRUE	hypothetical protein
LILKMKPI_01963	14.5548	48.8763	-1.7476	0.297797	mepS_2	1.3712e-11	8.7885e-12	TRUE	Murein DD-endopeptidase MepS/Murein LD-carboxypeptidase
LILKMKPI_01964	4.21323	22.5127	-2.4177	0.187154	nolA_1	2.8466e-07	1.412e-07	TRUE	Nodulation protein NolA
LILKMKPI_01970	4.97927	87.3848	-4.1334	0.05698	rsbW	2.6668e-30	3.0622e-30	TRUE	Serine-protein kinase RsbW
LILKMKPI_01971	0	19.8467	-4.6953	0.0385988	--	3.7617e-08	1.9807e-08	TRUE	Putative anti-sigma factor antagonist
LILKMKPI_01972	11.1076	246.011	-4.4691	0.0451509	walR	3.296e-83	9.0463e-83	TRUE	Transcriptional regulatory protein WalR
LILKMKPI_01973	4.97927	151.368	-4.926	0.0328947	--	3.3089e-52	5.9237e-52	TRUE	hypothetical protein
LILKMKPI_01974	6.12833	179.953	-4.876	0.0340548	--	1.0074e-61	2.105e-61	TRUE	hypothetical protein
LILKMKPI_01975	21.4491	441.812	-4.3644	0.0485495	acsAB	2.1324e-147	1.0242e-146	TRUE	Cellulose synthase 1
LILKMKPI_01976	11.1076	212.686	-4.2591	0.0522256	--	1.1594e-71	2.7343e-71	TRUE	hypothetical protein
LILKMKPI_01977	18.385	296.664	-4.0122	0.0619737	--	6.1755e-98	1.9615e-97	TRUE	hypothetical protein
LILKMKPI_01978	15.7038	144.111	-3.198	0.10897	--	8.5972e-45	1.3331e-44	TRUE	hypothetical protein
LILKMKPI_01979	4.59625	39.101	-3.0887	0.117546	--	4.0574e-13	2.7816e-13	TRUE	hypothetical protein
LILKMKPI_01980	78.9022	393.38	-2.3178	0.200573	barA_1	1.807e-99	5.7861e-99	TRUE	Signal transduction histidine-protein kinase BarA
LILKMKPI_01981	191.127	520.014	-1.444	0.367547	csxA	8.4127e-94	2.5463e-93	TRUE	Exo-beta-D-glucosaminidase
LILKMKPI_01983	42.8983	161.292	-1.9107	0.265963	lip-1_1	7.146e-37	9.6057e-37	TRUE	Lipase 1
LILKMKPI_01984	5.36229	26.6598	-2.3137	0.201144	lip-1_2	3.6385e-08	1.9209e-08	TRUE	Lipase 1
LILKMKPI_01987	105.714	216.981	-1.0374	0.487205	yegE_1	8.775e-32	1.0505e-31	TRUE	putative diguanylate cyclase YegE
LILKMKPI_02014	694.416	3393.49	-2.2889	0.204631	--	0	0	TRUE	hypothetical protein
LILKMKPI_02015	3.83021	26.0673	-2.7667	0.14694	--	8.7981e-09	4.8396e-09	TRUE	hypothetical protein
LILKMKPI_02020	61.2833	173.585	-1.5021	0.353039	ydfG	2.0384e-33	2.5447e-33	TRUE	NADP-dependent 3-hydroxy acid dehydrogenase YdfG
LILKMKPI_02023	31.0247	823.787	-4.7308	0.0376606	ydfZ	2.376e-275	2.1763e-274	TRUE	Putative selenoprotein YdfZ
LILKMKPI_02024	6.51135	44.2849	-2.7658	0.147032	por_1	6.5293e-14	4.6503e-14	TRUE	Polyol:NADP oxidoreductase
LILKMKPI_02026	2.29812	27.6965	-3.5912	0.0829738	--	2.8458e-10	1.7021e-10	TRUE	--
LILKMKPI_02028	169.295	594.365	-1.8118	0.284835	--	3.6942e-126	1.5729e-125	TRUE	hypothetical protein
LILKMKPI_02030	19.9171	43.3962	-1.1236	0.458947	--	6.5692e-08	3.3909e-08	TRUE	hypothetical protein
LILKMKPI_02032	23.7473	53.6158	-1.1749	0.442914	dmsA_2	1.0241e-09	5.9667e-10	TRUE	Dimethyl sulfoxide reductase DmsA
LILKMKPI_02033	0	6.96116	-3.1838	0.110048	dmsB_2	0.0020495	0.00072008	TRUE	Anaerobic dimethyl sulfoxide reductase chain B
LILKMKPI_02034	1.9151	9.77525	-2.3517	0.195915	dmsC_2	0.00080032	0.00029514	TRUE	Anaerobic dimethyl sulfoxide reductase chain C
LILKMKPI_02035	3.06416	9.0347	-1.56	0.339151	dmsD	0.0053176	0.0017877	TRUE	Tat proofreading chaperone DmsD
LILKMKPI_02036	4.59625	9.47903	-1.0443	0.48488	ydgC	0.013979	0.0044454	TRUE	Inner membrane protein YdgC
LILKMKPI_02040	23.3643	79.2388	-1.7619	0.29486	osmV	5.9157e-18	4.9679e-18	TRUE	Osmoprotectant import ATP-binding protein OsmV
LILKMKPI_02041	37.536	589.625	-3.9735	0.0636586	bioD1_2	3.2826e-192	2.1195e-191	TRUE	ATP-dependent dethiobiotin synthetase BioD 1
LILKMKPI_02042	17.2359	77.1652	-2.1625	0.223369	nagC_2	5.1258e-20	4.5882e-20	TRUE	N-acetylglucosamine repressor
LILKMKPI_02046	27.9605	182.027	-2.7027	0.153605	--	1.6214e-51	2.8509e-51	TRUE	hypothetical protein
LILKMKPI_02056	3.44718	32.288	-3.2275	0.106764	--	2.7246e-11	1.7211e-11	TRUE	hypothetical protein
LILKMKPI_02058	98.8193	283.779	-1.5219	0.348227	glgC_1	4.8765e-54	8.9959e-54	TRUE	Glucose-1-phosphate adenylyltransferase
LILKMKPI_02059	26.0454	69.1673	-1.4091	0.376547	rimL	1.1405e-13	8.0357e-14	TRUE	Ribosomal-protein-serine acetyltransferase
LILKMKPI_02061	78.1362	269.56	-1.7865	0.289874	pnbA	1.1473e-57	2.2315e-57	TRUE	Para-nitrobenzyl esterase
LILKMKPI_02062	89.2438	286.148	-1.6809	0.311888	--	1.6336e-58	3.2089e-58	TRUE	hypothetical protein
LILKMKPI_02063	13.7887	34.8058	-1.3358	0.396172	gbpR	2.4498e-07	1.2198e-07	TRUE	HTH-type transcriptional regulator GbpR
LILKMKPI_02064	98.4363	249.121	-1.3396	0.39513	nemA_2	1.8204e-43	2.7898e-43	TRUE	N-ethylmaleimide reductase
LILKMKPI_02070	5.36229	360.351	-6.0704	0.0148808	--	1.7865e-117	7.0363e-117	TRUE	hypothetical protein
LILKMKPI_02072	19.9171	48.4319	-1.282	0.411225	proP_3	2.0318e-09	1.1665e-09	TRUE	Proline/betaine transporter
LILKMKPI_02074	16.8529	67.9824	-2.0122	0.247895	axeA1	4.9625e-17	4.0216e-17	TRUE	Acetylxylan esterase
LILKMKPI_02079	0	7.5536	-3.3017	0.101412	fosA	0.0012031	0.00043453	TRUE	Glutathione transferase FosA
LILKMKPI_02083	14.5548	36.5831	-1.3297	0.397851	emrA_3	1.2745e-07	6.4476e-08	TRUE	Multidrug export protein EmrA
LILKMKPI_02084	16.8529	35.9907	-1.0946	0.468266	ttgC	1.1002e-06	5.2175e-07	TRUE	Toluene efflux pump outer membrane protein TtgC
LILKMKPI_02089	16.4699	69.7598	-2.0826	0.236089	--	8.0497e-18	6.7241e-18	TRUE	hypothetical protein
LILKMKPI_02107	4.59625	9.92336	-1.1104	0.463166	--	0.010106	0.0032868	TRUE	hypothetical protein
LILKMKPI_02117	82.3494	334.728	-2.0232	0.246012	mppA	1.3002e-77	3.2931e-77	TRUE	Periplasmic murein peptide-binding protein
LILKMKPI_02118	27.9605	153.294	-2.4548	0.182403	--	2.6854e-41	3.91e-41	TRUE	hypothetical protein
LILKMKPI_02119	125.248	288.37	-1.2031	0.434341	ycjG	2.6418e-46	4.2296e-46	TRUE	L-Ala-D/L-Glu epimerase
LILKMKPI_02120	98.4363	477.358	-2.2778	0.206212	tpx	6.0123e-119	2.4163e-118	TRUE	Thiol peroxidase
LILKMKPI_02124	40.9832	121.45	-1.5673	0.337439	ccpA_2	1.3551e-24	1.399e-24	TRUE	Catabolite control protein A
LILKMKPI_02129	885.926	2683.45	-1.5988	0.330151	yhjQ	0	0	TRUE	putative cysteine-rich protein YhjQ
LILKMKPI_02142	3.06416	8.59037	-1.4872	0.356704	--	0.0075933	0.0025153	TRUE	hypothetical protein
LILKMKPI_02148	2.29812	9.47903	-2.0443	0.24244	--	0.0016364	0.00058143	TRUE	hypothetical protein
LILKMKPI_02150	3.06416	8.44226	-1.4621	0.362964	--	0.008546	0.0028131	TRUE	hypothetical protein
LILKMKPI_02151	1.14906	5.33196	-2.2142	0.215506	--	0.015206	0.0048086	TRUE	hypothetical protein
LILKMKPI_02157	8.80947	20.4392	-1.2142	0.431012	--	0.00013547	5.3923e-05	TRUE	hypothetical protein
LILKMKPI_02168	63.1984	426.408	-2.7543	0.148208	--	1.8966e-119	7.6613e-119	TRUE	--
LILKMKPI_02169	13.0227	44.8773	-1.785	0.290176	--	6.6383e-11	4.1206e-11	TRUE	hypothetical protein
LILKMKPI_02173	0	5.33196	-3.4147	0.0937719	--	0.0061405	0.002053	TRUE	hypothetical protein
LILKMKPI_02176	4.59625	18.3656	-1.9985	0.25026	intQ	1.3672e-05	5.9208e-06	TRUE	Putative defective protein IntQ
LILKMKPI_02191	40.2172	81.0161	-1.0104	0.496409	sapD	1.251e-12	8.4227e-13	TRUE	Peptide transport system ATP-binding protein SapD
LILKMKPI_02192	24.5133	79.535	-1.698	0.308213	sapF	1.4153e-17	1.1747e-17	TRUE	Putrescine export system ATP-binding protein SapF
LILKMKPI_02196	49.0266	439.886	-3.1655	0.111452	gmr_1	2.6733e-132	1.2172e-131	TRUE	Cyclic di-GMP phosphodiesterase Gmr
LILKMKPI_02198	31.7907	128.559	-2.0158	0.247277	--	8.1336e-31	9.4358e-31	TRUE	hypothetical protein
LILKMKPI_02208	75.072	249.713	-1.7339	0.300638	pgpB	1.9577e-52	3.5287e-52	TRUE	Phosphatidylglycerophosphatase B
LILKMKPI_02211	14.5548	344.948	-4.5668	0.0421945	--	3.5467e-116	1.3695e-115	TRUE	hypothetical protein
LILKMKPI_02212	84.2645	835.192	-3.3091	0.100893	--	1.9896e-254	1.6673e-253	TRUE	hypothetical protein
LILKMKPI_02215	36.3869	125.449	-1.7856	0.290055	--	9.5472e-28	1.0474e-27	TRUE	hypothetical protein
LILKMKPI_02217	13.7887	45.0254	-1.7072	0.306254	yciK	1.2457e-10	7.5949e-11	TRUE	putative oxidoreductase YciK
LILKMKPI_02228	9.19249	1082.54	-6.8797	0.00849188	ompW	0	0	TRUE	Outer membrane protein W
LILKMKPI_02229	5.74531	13.478	-1.2302	0.426258	--	0.0018448	0.00065105	TRUE	hypothetical protein
LILKMKPI_02240	27.5775	56.1336	-1.0254	0.491274	oppF_1	2.8269e-09	1.6043e-09	TRUE	Oligopeptide transport ATP-binding protein OppF
LILKMKPI_02241	19.534	54.8007	-1.4882	0.356457	oppD_1	1.5352e-11	9.7995e-12	TRUE	Oligopeptide transport ATP-binding protein OppD
LILKMKPI_02242	18.768	42.8038	-1.1895	0.438455	oppC	4.2425e-08	2.2264e-08	TRUE	Oligopeptide transport system permease protein OppC
LILKMKPI_02243	21.8322	55.245	-1.3394	0.395185	oppB	7.5518e-11	4.6729e-11	TRUE	Oligopeptide transport system permease protein OppB
LILKMKPI_02244	70.4758	531.863	-2.9159	0.132503	oppA_2	3.6433e-153	1.8279e-152	TRUE	Periplasmic oligopeptide-binding protein
LILKMKPI_02246	762.594	2811.42	-1.8823	0.271251	adhE	0	0	TRUE	Aldehyde-alcohol dehydrogenase
LILKMKPI_02248	520.908	1368.09	-1.3931	0.380746	hns	3.3362e-237	2.5514e-236	TRUE	DNA-binding protein H-NS
LILKMKPI_02252	153.208	343.911	-1.1665	0.445501	rssB	1.1307e-53	2.0809e-53	TRUE	Regulator of RpoS
LILKMKPI_02259	91.5419	348.947	-1.9305	0.262338	narI	2.9312e-78	7.5454e-78	TRUE	Respiratory nitrate reductase 1 gamma chain
LILKMKPI_02260	3.83021	109.305	-4.8348	0.0350413	narJ	3.5038e-38	4.8421e-38	TRUE	Nitrate reductase molybdenum cofactor assembly chaperone NarJ
LILKMKPI_02261	6.89437	303.921	-5.4621	0.0226853	narH	4.4981e-102	1.4887e-101	TRUE	Respiratory nitrate reductase 1 beta chain
LILKMKPI_02262	10.3416	840.375	-6.3445	0.012306	narG	1.3893e-266	1.1896e-265	TRUE	Respiratory nitrate reductase 1 alpha chain
LILKMKPI_02263	3.44718	481.653	-7.1264	0.00715715	narK	4.0312e-144	1.9245e-143	TRUE	Nitrate/nitrite transporter NarK
LILKMKPI_02264	161.252	391.751	-1.2806	0.411624	narX	3.7379e-65	8.1561e-65	TRUE	Nitrate/nitrite sensor protein NarX
LILKMKPI_02265	27.9605	254.601	-3.1868	0.109819	narL_1	1.2729e-77	3.2343e-77	TRUE	Nitrate/nitrite response regulator protein NarL
LILKMKPI_02267	13.7887	56.578	-2.0367	0.243721	lppC_2	1.538e-14	1.1249e-14	TRUE	Putative lipoprotein LppC
LILKMKPI_02274	15.7038	84.867	-2.4341	0.185039	--	1.7166e-23	1.7247e-23	TRUE	hypothetical protein
LILKMKPI_02276	7.66041	49.4687	-2.691	0.154856	--	3.7899e-15	2.8431e-15	TRUE	hypothetical protein
LILKMKPI_02291	260.071	1526.27	-2.553	0.1704	--	0	0	TRUE	hypothetical protein
LILKMKPI_02299	22.5982	60.5769	-1.4226	0.373039	--	3.1215e-12	2.0645e-12	TRUE	hypothetical protein
LILKMKPI_02303	199.937	918.133	-2.1992	0.217758	--	9.7261e-222	7.0938e-221	TRUE	hypothetical protein
LILKMKPI_02304	18.385	46.6546	-1.3435	0.394063	ycgR	2.1156e-09	1.2128e-09	TRUE	Flagellar brake protein YcgR
LILKMKPI_02310	86.9457	221.276	-1.3477	0.392918	dadX	5.7133e-39	8.0126e-39	TRUE	Alanine racemase%2C catabolic
LILKMKPI_02311	119.885	595.402	-2.3122	0.201353	dadA	2.5576e-149	1.2436e-148	TRUE	D-amino acid dehydrogenase
LILKMKPI_02312	229.046	568.001	-1.3103	0.403237	--	3.2157e-95	9.8561e-95	TRUE	hypothetical protein
LILKMKPI_02316	23.3643	120.413	-2.3656	0.194037	--	4.4099e-32	5.3278e-32	TRUE	hypothetical protein
LILKMKPI_02319	48.2606	169.586	-1.8131	0.284579	--	2.6049e-37	3.5439e-37	TRUE	--
LILKMKPI_02320	26.0454	85.7556	-1.7192	0.303717	ycgL	5.4934e-19	4.8241e-19	TRUE	Protein YcgL
LILKMKPI_02322	55.538	200.541	-1.8523	0.27695	minD	1.8401e-44	2.8421e-44	TRUE	Septum site-determining protein MinD
LILKMKPI_02323	21.0661	46.8027	-1.1517	0.450095	minE	1.4938e-08	8.0759e-09	TRUE	Cell division topological specificity factor
LILKMKPI_02333	3.06416	7.99793	-1.3841	0.383128	--	0.012161	0.0039052	TRUE	hypothetical protein
LILKMKPI_02344	14.9378	686.045	-5.5213	0.0217732	manX	1.8369e-227	1.378e-226	TRUE	PTS system mannose-specific EIIAB component
LILKMKPI_02345	15.3208	239.049	-3.9637	0.0640925	manY	4.8628e-79	1.2642e-78	TRUE	PTS system mannose-specific EIIC component
LILKMKPI_02346	14.9378	289.11	-4.2746	0.0516675	manZ	8.4996e-97	2.6463e-96	TRUE	PTS system mannose-specific EIID component
LILKMKPI_02347	1.9151	9.62714	-2.3297	0.198925	--	0.00090977	0.00033285	TRUE	hypothetical protein
LILKMKPI_02355	128.312	348.354	-1.4409	0.368337	kdgR_1	2.3776e-63	5.0346e-63	TRUE	Transcriptional regulator KdgR
LILKMKPI_02359	54.3889	130.929	-1.2674	0.415408	msrC	9.6566e-23	9.4845e-23	TRUE	Free methionine-R-sulfoxide reductase
LILKMKPI_02360	62.0493	157.293	-1.342	0.394473	yebS	4.1867e-28	4.6124e-28	TRUE	Inner membrane protein YebS
LILKMKPI_02361	101.883	283.186	-1.4748	0.359783	pqiB_2	1.0211e-52	1.8448e-52	TRUE	Paraquat-inducible protein B
LILKMKPI_02363	219.471	1590.11	-2.857	0.138025	--	0	0	TRUE	hypothetical protein
LILKMKPI_02364	98.8193	209.872	-1.0866	0.47087	--	8.3458e-32	1.0021e-31	TRUE	hypothetical protein
LILKMKPI_02367	21.8322	156.996	-2.8462	0.139062	--	6.0475e-46	9.643e-46	TRUE	hypothetical protein
LILKMKPI_02368	28.3435	80.7199	-1.5099	0.351136	--	1.8701e-16	1.4731e-16	TRUE	hypothetical protein
LILKMKPI_02373	32.9398	95.8271	-1.5406	0.343742	holE	1.6394e-19	1.4591e-19	TRUE	DNA polymerase III subunit theta
LILKMKPI_02382	99.2023	265.117	-1.4182	0.374179	zwf	4.3671e-48	7.2118e-48	TRUE	Glucose-6-phosphate 1-dehydrogenase
LILKMKPI_02383	8.04343	45.0254	-2.4849	0.178637	hexR_3	2.4352e-13	1.696e-13	TRUE	HTH-type transcriptional regulator HexR
LILKMKPI_02384	47.4945	378.569	-2.9947	0.12546	pykA	4.2314e-111	1.5431e-110	TRUE	Pyruvate kinase II
LILKMKPI_02401	335.909	1942.02	-2.5314	0.172971	--	0	0	TRUE	hypothetical protein
LILKMKPI_02405	36.3869	73.3144	-1.0107	0.496305	patB_2	1.4344e-11	9.186e-12	TRUE	Cystathionine beta-lyase PatB
LILKMKPI_02406	175.04	456.327	-1.3824	0.38358	adh_2	6.041e-80	1.5968e-79	TRUE	Alcohol dehydrogenase
LILKMKPI_02407	96.5212	238.901	-1.3075	0.40402	--	4.9385e-41	7.1641e-41	TRUE	hypothetical protein
LILKMKPI_02416	2.68114	21.624	-3.0117	0.12399	--	8.3118e-08	4.2625e-08	TRUE	hypothetical protein
LILKMKPI_02418	4.21323	14.2185	-1.7548	0.296314	cheB	0.00026023	0.00010083	TRUE	Chemotaxis response regulator protein-glutamate methylesterase
LILKMKPI_02419	2.68114	11.4045	-2.0887	0.235092	cheR	0.00050095	0.00018853	TRUE	Chemotaxis protein methyltransferase
LILKMKPI_02421	5.74531	35.3983	-2.6232	0.162307	tar_3	4.0955e-11	2.5685e-11	TRUE	Methyl-accepting chemotaxis protein II
LILKMKPI_02422	4.59625	62.9467	-3.7756	0.0730182	--	8.79e-22	8.3825e-22	TRUE	hypothetical protein
LILKMKPI_02423	23.7473	504.907	-4.4102	0.0470324	caf1A	2.03e-168	1.1182e-167	TRUE	F1 capsule-anchoring protein
LILKMKPI_02424	12.2567	255.49	-4.3816	0.0479741	--	4.1406e-86	1.1649e-85	TRUE	hypothetical protein
LILKMKPI_02425	6.51135	154.034	-4.5642	0.0422706	--	6.5769e-53	1.1965e-52	TRUE	hypothetical protein
LILKMKPI_02426	42.8983	942.571	-4.4576	0.0455123	--	0	0	TRUE	hypothetical protein
LILKMKPI_02427	66.2625	234.458	-1.8231	0.282613	cheW	4.1283e-51	7.1944e-51	TRUE	Chemotaxis protein CheW
LILKMKPI_02428	26.8114	59.3921	-1.1474	0.451438	cheA	1.8927e-10	1.146e-10	TRUE	Chemotaxis protein CheA
LILKMKPI_02433	24.1303	155.219	-2.6854	0.155458	uspC	4.945e-44	7.593e-44	TRUE	Universal stress protein C
LILKMKPI_02445	9.19249	23.4014	-1.3481	0.392809	hsrA_1	2.1691e-05	9.2158e-06	TRUE	putative transport protein HsrA
LILKMKPI_02446	10.7246	24.8825	-1.2142	0.431012	--	2.5455e-05	1.0786e-05	TRUE	hypothetical protein
LILKMKPI_02449	3.06416	182.916	-5.8995	0.0167523	ftnA_2	4.1308e-61	8.5403e-61	TRUE	Bacterial non-heme ferritin
LILKMKPI_02451	6.51135	19.4024	-1.5752	0.335597	--	4.1452e-05	1.7221e-05	TRUE	--
LILKMKPI_02463	270.029	646.203	-1.2589	0.417862	fliY	6.2429e-105	2.1474e-104	TRUE	L-cystine-binding protein FliY
LILKMKPI_02464	2.29812	10.9601	-2.2537	0.209686	fliZ	0.00046374	0.0001752	TRUE	Regulator of sigma S factor FliZ
LILKMKPI_02465	10.3416	45.766	-2.1458	0.22597	fliA	1.9683e-12	1.3162e-12	TRUE	RNA polymerase sigma factor FliA
LILKMKPI_02468	3.44718	13.0337	-1.9188	0.264474	lcfB	0.00030469	0.00011708	TRUE	Long-chain-fatty-acid--CoA ligase
LILKMKPI_02469	3.44718	8.88659	-1.3662	0.387912	dxs_2	0.0085346	0.0028105	TRUE	1-deoxy-D-xylulose-5-phosphate synthase
LILKMKPI_02471	3.06416	7.84982	-1.3572	0.390339	fabG_3	0.01367	0.0043566	TRUE	3-oxoacyl-[acyl-carrier-protein] reductase FabG
LILKMKPI_02478	39.0681	297.849	-2.9305	0.131169	hag	7.4318e-87	2.1365e-86	TRUE	Flagellin
LILKMKPI_02479	14.9378	65.0202	-2.1219	0.229744	fliD	6.5267e-17	5.246e-17	TRUE	Flagellar hook-associated protein 2
LILKMKPI_02483	16.4699	62.058	-1.9138	0.265393	--	3.4673e-15	2.6111e-15	TRUE	hypothetical protein
LILKMKPI_02489	67.4116	192.247	-1.5119	0.350649	--	5.3455e-37	7.2101e-37	TRUE	hypothetical protein
LILKMKPI_02491	255.475	593.328	-1.2156	0.430594	--	4.6349e-94	1.4096e-93	TRUE	hypothetical protein
LILKMKPI_02492	11.4906	46.8027	-2.0261	0.245518	--	3.0309e-12	2.0076e-12	TRUE	hypothetical protein
LILKMKPI_02493	4.21323	113.748	-4.7548	0.0370393	--	1.2114e-39	1.7318e-39	TRUE	hypothetical protein
LILKMKPI_02494	7.27739	63.2429	-3.1194	0.115071	--	2.3003e-20	2.0923e-20	TRUE	hypothetical protein
LILKMKPI_02495	11.1076	38.0642	-1.7769	0.29181	--	1.9404e-09	1.1149e-09	TRUE	hypothetical protein
LILKMKPI_02526	20.6831	43.6924	-1.0789	0.47339	pgrR_2	9.2719e-08	4.7395e-08	TRUE	HTH-type transcriptional regulator PgrR
LILKMKPI_02527	221.386	470.989	-1.0891	0.470055	cph2_1	2.5777e-69	5.8181e-69	TRUE	Phytochrome-like protein cph2
LILKMKPI_02537	59.3682	134.188	-1.1765	0.442424	amn	4.2762e-22	4.1483e-22	TRUE	AMP nucleosidase
LILKMKPI_02540	46.3455	108.268	-1.2241	0.428064	yeeO	1.248e-18	1.0767e-18	TRUE	putative FMN/FAD exporter YeeO
LILKMKPI_02542	129.078	338.727	-1.3919	0.381063	--	4.0842e-60	8.2491e-60	TRUE	hypothetical protein
LILKMKPI_02550	29.4926	133.151	-2.1746	0.221503	puuD_2	1.7766e-33	2.2213e-33	TRUE	Gamma-glutamyl-gamma-aminobutyrate hydrolase PuuD
LILKMKPI_02560	8.42645	25.7711	-1.6128	0.326963	hisI	1.8797e-06	8.7663e-07	TRUE	Phosphoribosyl-AMP cyclohydrolase
LILKMKPI_02562	345.868	724.702	-1.0672	0.477244	gnd	4.1728e-104	1.4107e-103	TRUE	6-phosphogluconate dehydrogenase%2C decarboxylating
LILKMKPI_02563	8.80947	59.5402	-2.7567	0.147962	wbbL	3.7915e-18	3.208e-18	TRUE	Rhamnosyltransferase WbbL
LILKMKPI_02564	5.74531	77.3134	-3.7503	0.07431	--	2.486e-26	2.657e-26	TRUE	hypothetical protein
LILKMKPI_02565	12.2567	94.7903	-2.9512	0.129301	--	6.1128e-29	6.8591e-29	TRUE	hypothetical protein
LILKMKPI_02566	8.42645	101.751	-3.594	0.0828129	wzy	1.1857e-33	1.4897e-33	TRUE	hypothetical protein
LILKMKPI_02567	12.6397	71.389	-2.4977	0.177059	--	2.5802e-20	2.3361e-20	TRUE	hypothetical protein
LILKMKPI_02568	15.3208	109.749	-2.8406	0.139603	--	1.3277e-32	1.6341e-32	TRUE	hypothetical protein
LILKMKPI_02569	24.8963	123.968	-2.316	0.200823	rfbX/wzx	1.4965e-32	1.8362e-32	TRUE	Putative O-antigen transporter
LILKMKPI_02570	8.80947	68.2787	-2.9543	0.129023	rfbC	2.6002e-21	2.4326e-21	TRUE	dTDP-4-dehydrorhamnose 3%2C5-epimerase
LILKMKPI_02571	14.9378	58.2072	-1.9622	0.256637	rmlA	1.4405e-14	1.0575e-14	TRUE	Glucose-1-phosphate thymidylyltransferase
LILKMKPI_02572	31.4077	89.4584	-1.5101	0.351087	rfbD	4.5307e-18	3.8251e-18	TRUE	dTDP-4-dehydrorhamnose reductase
LILKMKPI_02573	64.3474	286.889	-2.1565	0.2243	rfbB	1.0383e-69	2.3638e-69	TRUE	dTDP-glucose 4%2C6-dehydratase
LILKMKPI_02599	70.0928	152.998	-1.1262	0.458121	yegE_2	3.2043e-24	3.2738e-24	TRUE	putative diguanylate cyclase YegE
LILKMKPI_02603	37.919	82.9415	-1.1292	0.457169	higB2_1	7.2719e-14	5.1558e-14	TRUE	Putative toxin HigB2
LILKMKPI_02610	22.5982	54.3563	-1.2662	0.415753	baeR	2.5809e-10	1.546e-10	TRUE	Transcriptional regulatory protein BaeR
LILKMKPI_02617	5.74531	11.8488	-1.0443	0.48488	--	0.0059976	0.0020086	TRUE	hypothetical protein
LILKMKPI_02618	5.74531	46.2103	-3.0078	0.124326	rcnB	4.7555e-15	3.554e-15	TRUE	Nickel/cobalt homeostasis protein RcnB
LILKMKPI_02620	2.68114	70.2041	-4.7106	0.0381916	--	4.2516e-25	4.4299e-25	TRUE	hypothetical protein
LILKMKPI_02621	2.68114	241.419	-6.4925	0.0111061	--	3.4509e-77	8.6571e-77	TRUE	hypothetical protein
LILKMKPI_02623	3.06416	9.18281	-1.5834	0.333695	yehT	0.0047197	0.0015977	TRUE	Transcriptional regulatory protein YehT
LILKMKPI_02625	4.21323	23.1051	-2.4552	0.182352	--	1.7344e-07	8.7186e-08	TRUE	hypothetical protein
LILKMKPI_02628	0	30.2144	-5.3017	0.025353	--	1.2215e-11	7.8484e-12	TRUE	hypothetical protein
LILKMKPI_02637	19.151	57.911	-1.5964	0.330701	yehX	1.0996e-12	7.4224e-13	TRUE	Glycine betaine uptake system ATP-binding protein YehX
LILKMKPI_02639	39.8341	151.665	-1.9288	0.262648	yehZ	5.3641e-35	6.9154e-35	TRUE	Glycine betaine-binding protein YehZ
LILKMKPI_02641	68.1777	519.125	-2.9287	0.131333	dld	6.873e-150	3.3627e-149	TRUE	D-lactate dehydrogenase
LILKMKPI_02642	6.51135	16.8845	-1.3747	0.385633	pat	0.00027923	0.00010777	TRUE	Phosphinothricin N-acetyltransferase
LILKMKPI_02656	8.42645	24.8825	-1.5621	0.338658	mglC	3.696e-06	1.6868e-06	TRUE	Galactoside transport system permease protein MglC
LILKMKPI_02657	10.3416	43.6924	-2.0789	0.236695	mglA_1	1.0384e-11	6.7213e-12	TRUE	Galactose/methyl galactoside import ATP-binding protein MglA
LILKMKPI_02658	6.12833	264.524	-5.4318	0.0231668	mglB	3.6055e-89	1.0558e-88	TRUE	D-galactose-binding periplasmic protein
LILKMKPI_02667	9.19249	274.744	-4.9015	0.0334581	--	2.9701e-93	8.8958e-93	TRUE	hypothetical protein
LILKMKPI_02678	10.3416	48.1357	-2.2187	0.214835	uxuA	2.9104e-13	2.011e-13	TRUE	Mannonate dehydratase
LILKMKPI_02686	8.04343	16.8845	-1.0698	0.476385	yejE	0.00093469	0.00034118	TRUE	Inner membrane ABC transporter permease protein YejE
LILKMKPI_02705	6.51135	23.2533	-1.8364	0.28002	--	2.0527e-06	9.5506e-07	TRUE	hypothetical protein
LILKMKPI_02711	145.931	2840.45	-4.2828	0.0513746	ompC	0	0	TRUE	Outer membrane protein C
LILKMKPI_02720	55.155	745.141	-3.756	0.074017	glpQ	2.0887e-238	1.629e-237	TRUE	Glycerophosphodiester phosphodiesterase%2C periplasmic
LILKMKPI_02721	60.9003	1065.21	-4.1285	0.0571739	glpT	0	0	TRUE	Glycerol-3-phosphate transporter
LILKMKPI_02722	37.153	97.6044	-1.3935	0.38064	pncC_2	1.609e-18	1.3822e-18	TRUE	Nicotinamide-nucleotide amidohydrolase PncC
LILKMKPI_02724	5.36229	19.2543	-1.8443	0.27849	rssA	1.5095e-05	6.508e-06	TRUE	Swarming motility regulation sensor protein RssA
LILKMKPI_02725	4.59625	18.0694	-1.975	0.25437	tctD	1.7397e-05	7.4516e-06	TRUE	Transcriptional regulatory protein tctD
LILKMKPI_02730	11.1076	58.9477	-2.4079	0.18843	menE	1.0785e-16	8.5469e-17	TRUE	2-succinylbenzoate--CoA ligase
LILKMKPI_02731	4.97927	52.579	-3.4005	0.0946995	menC	8.1489e-18	6.7997e-18	TRUE	o-succinylbenzoate synthase
LILKMKPI_02732	6.12833	87.681	-3.8387	0.0698934	menB	7.6021e-30	8.7038e-30	TRUE	1%2C4-dihydroxy-2-naphthoyl-CoA synthase
LILKMKPI_02733	4.97927	30.2144	-2.6012	0.164801	menH	1.1807e-09	6.8388e-10	TRUE	2-succinyl-6-hydroxy-2%2C4-cyclohexadiene-1-carboxylate synthase
LILKMKPI_02734	45.9625	259.34	-2.4963	0.177231	menD	2.4818e-69	5.6176e-69	TRUE	2-succinyl-5-enolpyruvyl-6-hydroxy-3-cyclohexene-1-carboxylate synthase
LILKMKPI_02739	98.0533	360.648	-1.879	0.271872	nuoN	2.6241e-79	6.8444e-79	TRUE	NADH-quinone oxidoreductase subunit N
LILKMKPI_02740	81.2003	280.372	-1.7878	0.289613	nuoM	6.165e-60	1.2388e-59	TRUE	NADH-quinone oxidoreductase subunit M
LILKMKPI_02741	119.502	316.659	-1.4059	0.377383	nuoL	9.9676e-57	1.9103e-56	TRUE	NADH-quinone oxidoreductase subunit L
LILKMKPI_02742	3.83021	9.92336	-1.3734	0.385981	nuoK	0.0053554	0.0017997	TRUE	NADH-quinone oxidoreductase subunit K
LILKMKPI_02743	25.6624	70.6484	-1.461	0.363241	nuoJ	2.8448e-14	2.0597e-14	TRUE	NADH-quinone oxidoreductase subunit J
LILKMKPI_02744	25.2794	71.389	-1.4977	0.354117	nuoI_2	1.1964e-14	8.8324e-15	TRUE	NADH-quinone oxidoreductase subunit I
LILKMKPI_02745	70.4758	179.065	-1.3453	0.393572	nuoH	8.0614e-32	9.6947e-32	TRUE	NADH-quinone oxidoreductase subunit H
LILKMKPI_02746	247.431	702.781	-1.506	0.352086	nuoG	4.5256e-130	2.0371e-129	TRUE	NADH-quinone oxidoreductase subunit G
LILKMKPI_02747	84.2645	343.911	-2.029	0.245025	nuoF	7.5525e-80	1.9897e-79	TRUE	NADH-quinone oxidoreductase subunit F
LILKMKPI_02748	26.8114	91.3838	-1.7691	0.293392	nuoE	1.6005e-20	1.4575e-20	TRUE	NADH-quinone oxidoreductase subunit E
LILKMKPI_02749	139.036	465.213	-1.7424	0.298872	nuoC	1.9566e-96	6.0439e-96	TRUE	NADH-quinone oxidoreductase subunit C/D
LILKMKPI_02750	51.7078	252.231	-2.2863	0.205001	nuoB	6.839e-64	1.4599e-63	TRUE	NADH-quinone oxidoreductase subunit B
LILKMKPI_02751	140.952	522.976	-1.8915	0.269527	ndhC	1.0951e-114	4.1273e-114	TRUE	NAD(P)H-quinone oxidoreductase subunit 3
LILKMKPI_02756	111.842	261.414	-1.2249	0.427827	yfbT	1.1038e-42	1.6624e-42	TRUE	Sugar phosphatase YfbT
LILKMKPI_02757	65.8795	223.942	-1.7652	0.294186	--	8.3367e-48	1.3681e-47	TRUE	hypothetical protein
LILKMKPI_02764	42.1323	103.973	-1.3032	0.405226	yfcD	9.6827e-19	8.4185e-19	TRUE	putative Nudix hydrolase YfcD
LILKMKPI_02766	15.3208	47.5433	-1.6337	0.322261	yfcF	7.7951e-11	4.8105e-11	TRUE	Glutathione S-transferase YfcF
LILKMKPI_02767	24.5133	141.593	-2.5301	0.173127	yfcG_1	5.7167e-39	8.0126e-39	TRUE	Disulfide-bond oxidoreductase YfcG
LILKMKPI_02768	134.44	320.658	-1.2541	0.419255	--	7.524e-53	1.3656e-52	TRUE	Epimerase family protein
LILKMKPI_02771	9.57551	31.9917	-1.7403	0.299307	hisP	4.7246e-08	2.4647e-08	TRUE	Histidine transport ATP-binding protein HisP
LILKMKPI_02773	6.51135	13.6261	-1.0653	0.477873	hisQ	0.0029929	0.0010376	TRUE	Histidine transport system permease protein HisQ
LILKMKPI_02774	20.6831	73.0182	-1.8198	0.28326	hisJ	5.011e-17	4.0567e-17	TRUE	Histidine-binding periplasmic protein
LILKMKPI_02775	19.151	43.2481	-1.1752	0.442822	argT	4.1549e-08	2.1819e-08	TRUE	Lysine/arginine/ornithine-binding periplasmic protein
LILKMKPI_02788	77.7532	405.673	-2.3833	0.19167	fabB	2.3782e-104	8.0748e-104	TRUE	3-oxoacyl-[acyl-carrier-protein] synthase 1
LILKMKPI_02789	57.8361	180.546	-1.6423	0.320345	mnmC	5.8718e-37	7.9065e-37	TRUE	tRNA 5-methylaminomethyl-2-thiouridine biosynthesis bifunctional protein MnmC
LILKMKPI_02798	51.7078	277.706	-2.4251	0.186197	fadJ	8.2296e-73	1.9644e-72	TRUE	Fatty acid oxidation complex subunit alpha
LILKMKPI_02799	61.2833	327.323	-2.4171	0.187232	fadI	2.6019e-85	7.2937e-85	TRUE	3-ketoacyl-CoA thiolase
LILKMKPI_02800	230.195	1823.08	-2.9855	0.126263	--	0	0	TRUE	hypothetical protein
LILKMKPI_02801	52.4738	129.152	-1.2994	0.406295	fadL	7.5552e-23	7.4391e-23	TRUE	Long-chain fatty acid transport protein
LILKMKPI_02802	34.8549	116.562	-1.7417	0.299017	mlaA	1.8479e-25	1.9382e-25	TRUE	putative phospholipid-binding lipoprotein MlaA
LILKMKPI_02812	10.3416	98.9374	-3.2581	0.104524	yfdC	1.526e-31	1.8158e-31	TRUE	Inner membrane protein YfdC
LILKMKPI_02829	6.89437	18.0694	-1.3901	0.381538	budC	0.00016005	6.3257e-05	TRUE	Diacetyl reductase [(S)-acetoin forming]
LILKMKPI_02835	15.7038	48.7281	-1.6336	0.322283	--	4.5521e-11	2.8458e-11	TRUE	hypothetical protein
LILKMKPI_02836	60.1342	159.959	-1.4114	0.375947	alaC	1.363e-29	1.5425e-29	TRUE	Glutamate-pyruvate aminotransferase AlaC
LILKMKPI_02840	162.018	395.601	-1.2879	0.409547	glk	4.7638e-66	1.0541e-65	TRUE	Glucokinase
LILKMKPI_02844	47.8776	118.636	-1.3091	0.403573	mntH	3.1543e-21	2.9439e-21	TRUE	Divalent metal cation transporter MntH
LILKMKPI_02849	11.4906	95.9752	-3.0622	0.119725	--	8.2975e-30	9.4587e-30	TRUE	hypothetical protein
LILKMKPI_02850	8.80947	48.7281	-2.4676	0.180792	--	2.9372e-14	2.1246e-14	TRUE	hypothetical protein
LILKMKPI_02856	9.57551	22.5127	-1.2333	0.425343	--	5.6099e-05	2.3063e-05	TRUE	hypothetical protein
LILKMKPI_02860	26.0454	64.5759	-1.31	0.403321	cysZ	2.9703e-12	1.9711e-12	TRUE	Sulfate transporter CysZ
LILKMKPI_02862	120.268	543.859	-2.177	0.221135	ptsH	2.8443e-131	1.2876e-130	TRUE	Phosphocarrier protein HPr
LILKMKPI_02863	685.99	1699.26	-1.3087	0.403684	ptsI	8.8534e-281	8.3023e-280	TRUE	Phosphoenolpyruvate-protein phosphotransferase
LILKMKPI_02872	27.1945	58.2072	-1.0979	0.467196	yfeZ	5.5141e-10	3.256e-10	TRUE	Inner membrane protein YfeZ
LILKMKPI_02874	63.5814	146.925	-1.2084	0.432748	ypeA	1.7154e-24	1.7617e-24	TRUE	Acetyltransferase YpeA
LILKMKPI_02879	4.59625	13.6261	-1.5678	0.337322	--	0.0006052	0.00022615	TRUE	hypothetical protein
LILKMKPI_02887	6.89437	29.9182	-2.1175	0.230446	--	1.4822e-08	8.0298e-09	TRUE	hypothetical protein
LILKMKPI_02888	34.8549	193.728	-2.4746	0.179917	cstA	5.6158e-52	9.9592e-52	TRUE	Carbon starvation protein A
LILKMKPI_02899	156.655	733.292	-2.2268	0.213632	maeB	5.6049e-179	3.3447e-178	TRUE	NADP-dependent malic enzyme
LILKMKPI_02906	22.5982	55.8374	-1.305	0.404721	nudK_2	9.1399e-11	5.6159e-11	TRUE	GDP-mannose pyrophosphatase NudK
LILKMKPI_02916	34.4718	76.2766	-1.1458	0.451939	purC	5.3945e-13	3.6886e-13	TRUE	Phosphoribosylaminoimidazole-succinocarboxamide synthase
LILKMKPI_02919	19.9171	82.7934	-2.0555	0.240565	gcvR	1.1051e-20	1.0087e-20	TRUE	Glycine cleavage system transcriptional repressor
LILKMKPI_02920	61.6663	205.28	-1.735	0.300409	bcp	1.9397e-43	2.9668e-43	TRUE	Putative peroxiredoxin bcp
LILKMKPI_02929	100.351	267.931	-1.4168	0.374542	ppk	1.5233e-48	2.5423e-48	TRUE	Polyphosphate kinase
LILKMKPI_02948	80.0513	231.644	-1.5329	0.345582	yfhM	1.1477e-44	1.7761e-44	TRUE	putative lipoprotein YfhM
LILKMKPI_02950	3.83021	13.3299	-1.7992	0.287334	pagL	0.0003592	0.00013689	TRUE	6-phospho-alpha-glucosidase
LILKMKPI_02951	37.919	128.263	-1.7581	0.295637	sseA	4.9543e-28	5.4505e-28	TRUE	3-mercaptopyruvate sulfurtransferase
LILKMKPI_02952	14.5548	49.0244	-1.752	0.29689	hexR_4	1.2241e-11	7.8584e-12	TRUE	HTH-type transcriptional regulator HexR
LILKMKPI_02968	9.57551	21.1797	-1.1453	0.452096	--	0.00014404	5.716e-05	TRUE	hypothetical protein
LILKMKPI_02969	38.3021	578.665	-3.9172	0.066192	--	5.9582e-188	3.7547e-187	TRUE	hypothetical protein
LILKMKPI_03001	287.648	1880.85	-2.709	0.152936	grcA	0	0	TRUE	Autonomous glycyl radical cofactor
LILKMKPI_03006	119.885	393.972	-1.7164	0.304307	--	4.4451e-81	1.1991e-80	TRUE	--
LILKMKPI_03010	6.89437	21.4759	-1.6392	0.321034	--	1.203e-05	5.2237e-06	TRUE	hypothetical protein
LILKMKPI_03012	7.27739	32.5842	-2.1627	0.223338	--	2.6281e-09	1.4936e-09	TRUE	hypothetical protein
LILKMKPI_03024	2805.24	8170.04	-1.5422	0.343361	raiA	0	0	TRUE	Ribosome-associated inhibitor A
LILKMKPI_03039	23.3643	82.4972	-1.82	0.283221	nadK	4.8944e-19	4.3076e-19	TRUE	NAD kinase
LILKMKPI_03045	26.8114	153.738	-2.5196	0.174391	prsE	4.6464e-42	6.8798e-42	TRUE	Type I secretion system membrane fusion protein PrsE
LILKMKPI_03046	46.3455	225.571	-2.2831	0.205456	apxIB	2.8e-57	5.4191e-57	TRUE	Toxin RTX-I translocation ATP-binding protein
LILKMKPI_03047	34.4718	293.109	-3.0879	0.117611	bepC	9.1055e-88	2.637e-87	TRUE	Outer membrane efflux protein BepC
LILKMKPI_03048	1331	3501.17	-1.3953	0.380166	--	0	0	TRUE	hypothetical protein
LILKMKPI_03049	0	5.92439	-3.9512	0.0646503	--	0.0030571	0.001059	TRUE	hypothetical protein
LILKMKPI_03052	3.06416	14.0704	-2.1991	0.217773	--	8.347e-05	3.3857e-05	TRUE	hypothetical protein
LILKMKPI_03054	8.80947	31.9917	-1.8606	0.275362	smc_2	2.1975e-08	1.1759e-08	TRUE	Chromosome partition protein Smc
LILKMKPI_03055	2.68114	15.4034	-2.5223	0.174065	--	1.6871e-05	7.2303e-06	TRUE	hypothetical protein
LILKMKPI_03056	0	16.5883	-4.4366	0.0461796	--	5.2847e-07	2.5744e-07	TRUE	hypothetical protein
LILKMKPI_03057	2.29812	47.0989	-4.3572	0.0487924	gpFI	3.1657e-17	2.5921e-17	TRUE	Putative prophage major tail sheath protein
LILKMKPI_03058	14.1718	53.4677	-1.9156	0.265062	tfaE	2.6683e-13	1.847e-13	TRUE	Prophage tail fiber assembly protein TfaE
LILKMKPI_03059	5.74531	47.9876	-3.0622	0.119725	--	1.0691e-15	8.2323e-16	TRUE	hypothetical protein
LILKMKPI_03060	1.9151	7.10927	-1.8923	0.269377	--	0.0079571	0.0026269	TRUE	hypothetical protein
LILKMKPI_03061	2.29812	25.4749	-3.4705	0.0902143	--	1.8635e-09	1.073e-09	TRUE	hypothetical protein
LILKMKPI_03062	0	4.29519	-3.4872	0.089176	--	0.013518	0.0043117	TRUE	hypothetical protein
LILKMKPI_03063	3.83021	54.0601	-3.8191	0.0708494	--	5.4143e-19	4.7599e-19	TRUE	hypothetical protein
LILKMKPI_03064	22.9812	255.638	-3.4756	0.089896	--	7.6176e-81	2.0479e-80	TRUE	hypothetical protein
LILKMKPI_03073	1.14906	21.4759	-4.2242	0.0535043	--	1.3181e-08	7.1654e-09	TRUE	hypothetical protein
LILKMKPI_03074	0	30.6587	-6.3227	0.0124933	--	2.6059e-11	1.6501e-11	TRUE	hypothetical protein
LILKMKPI_03075	5.74531	11.7007	-1.0261	0.491036	--	0.0066627	0.0022173	TRUE	hypothetical protein
LILKMKPI_03076	2.68114	8.59037	-1.6799	0.312104	--	0.0052146	0.0017569	TRUE	hypothetical protein
LILKMKPI_03077	42.1323	86.0518	-1.0303	0.489608	--	1.7179e-13	1.2018e-13	TRUE	hypothetical protein
LILKMKPI_03080	3.83021	32.4361	-3.0821	0.118085	--	4.0267e-11	2.5274e-11	TRUE	hypothetical protein
LILKMKPI_03082	0	7.84982	-3.9727	0.0636939	--	0.00064505	0.00024013	TRUE	hypothetical protein
LILKMKPI_03084	1.14906	6.0725	-2.4018	0.189228	--	0.0078036	0.0025784	TRUE	hypothetical protein
LILKMKPI_03085	2.29812	38.5086	-4.0667	0.0596762	--	3.4718e-14	2.5067e-14	TRUE	hypothetical protein
LILKMKPI_03086	0	37.768	-6.6236	0.0101414	--	2.5145e-13	1.7451e-13	TRUE	hypothetical protein
LILKMKPI_03087	6.89437	20.4392	-1.5678	0.337322	--	2.6692e-05	1.1298e-05	TRUE	hypothetical protein
LILKMKPI_03088	0	10.5158	-4.3945	0.0475471	xerD_1	6.5863e-05	2.6965e-05	TRUE	Tyrosine recombinase XerD
LILKMKPI_03089	16.8529	58.0591	-1.7845	0.290277	--	1.1265e-13	7.9439e-14	TRUE	hypothetical protein
LILKMKPI_03090	9.57551	209.279	-4.4499	0.0457558	intA_2	5.0154e-71	1.1586e-70	TRUE	Prophage integrase IntA
LILKMKPI_03092	2.29812	11.1082	-2.2731	0.206885	--	0.00040863	0.00015497	TRUE	hypothetical protein
LILKMKPI_03102	24.1303	87.2367	-1.8541	0.276605	hsdR	2.7373e-20	2.4755e-20	TRUE	Type-1 restriction enzyme R protein
LILKMKPI_03103	9.57551	79.9793	-3.0622	0.119725	--	4.0944e-25	4.2718e-25	TRUE	hypothetical protein
LILKMKPI_03104	10.3416	67.5381	-2.7072	0.153127	rapA_2	3.5131e-20	3.1699e-20	TRUE	RNA polymerase-associated protein RapA
LILKMKPI_03105	33.3228	67.8343	-1.0255	0.49124	--	6.5068e-11	4.0422e-11	TRUE	hypothetical protein
LILKMKPI_03127	50.5587	368.794	-2.8668	0.13709	luxS	7.4231e-106	2.5873e-105	TRUE	S-ribosylhomocysteine lyase
LILKMKPI_03136	965.595	2409.9	-1.3195	0.400674	csrA	0	0	TRUE	Carbon storage regulator
LILKMKPI_03141	23.3643	87.0886	-1.8982	0.268278	mltB	1.4157e-20	1.2907e-20	TRUE	Membrane-bound lytic murein transglycosylase B
LILKMKPI_03142	3.83021	12.2931	-1.6824	0.311564	glnQ_4	0.00082718	0.00030447	TRUE	Glutamine transport ATP-binding protein GlnQ
LILKMKPI_03143	4.21323	18.0694	-2.1006	0.233161	artQ_2	1.1372e-05	4.9518e-06	TRUE	Arginine transport system permease protein ArtQ
LILKMKPI_03144	10.7246	125.153	-3.5447	0.0856917	glnH_2	8.5225e-41	1.2295e-40	TRUE	Glutamine-binding periplasmic protein
LILKMKPI_03145	0	14.2185	-5.2142	0.0269383	--	3.264e-06	1.4965e-06	TRUE	hypothetical protein
LILKMKPI_03146	19.151	50.5055	-1.399	0.379192	tsr_5	2.5089e-10	1.504e-10	TRUE	Methyl-accepting chemotaxis protein I
LILKMKPI_03147	8.80947	36.8794	-2.0657	0.23887	--	4.5313e-10	2.6898e-10	TRUE	hypothetical protein
LILKMKPI_03152	11.4906	50.0611	-2.1232	0.229537	hosA	2.2514e-13	1.5708e-13	TRUE	Transcriptional regulator HosA
LILKMKPI_03158	16.4699	68.4268	-2.0547	0.240699	pcm	2.3169e-17	1.907e-17	TRUE	Protein-L-isoaspartate O-methyltransferase
LILKMKPI_03159	57.4531	115.822	-1.0115	0.49603	surE	2.0295e-17	1.6757e-17	TRUE	5'/3'-nucleotidase SurE
LILKMKPI_03191	134.44	473.655	-1.8169	0.28383	--	3.9487e-101	1.2906e-100	TRUE	hypothetical protein
LILKMKPI_03192	65.8795	690.488	-3.3897	0.095411	sdaC_1	7.2486e-213	5.1439e-212	TRUE	Serine transporter
LILKMKPI_03193	30.6416	132.114	-2.1082	0.231936	sdaB	1.4378e-32	1.7668e-32	TRUE	L-serine dehydratase 2
LILKMKPI_03198	1483.82	9908.55	-2.7394	0.149747	ygdR_2	0	0	TRUE	putative lipoprotein YgdR
LILKMKPI_03206	92.691	331.47	-1.8384	0.279632	argA	6.2449e-72	1.4817e-71	TRUE	Amino-acid acetyltransferase
LILKMKPI_03221	31.4077	88.4216	-1.4933	0.355199	ygdR_3	9.6357e-18	8.0319e-18	TRUE	putative lipoprotein YgdR
LILKMKPI_03225	24.8963	93.3092	-1.9061	0.266813	galR_2	5.4255e-22	5.2309e-22	TRUE	HTH-type transcriptional regulator GalR
LILKMKPI_03228	0	6.51683	-3.0887	0.117546	celA_2	0.0030638	0.0010608	TRUE	PTS system cellobiose-specific EIIB component
LILKMKPI_03229	8.42645	50.9498	-2.5961	0.165385	gmuD_2	2.9194e-15	2.2006e-15	TRUE	6-phospho-beta-glucosidase GmuD
LILKMKPI_03230	7.66041	23.2533	-1.6019	0.329443	licC_4	6.3068e-06	2.8083e-06	TRUE	Lichenan permease IIC component
LILKMKPI_03234	22.5982	71.8333	-1.6684	0.314602	--	7.7716e-16	6.0194e-16	TRUE	--
LILKMKPI_03235	0	14.6629	-4.2586	0.0522437	--	2.6011e-06	1.1996e-06	TRUE	hypothetical protein
LILKMKPI_03236	45.9625	122.783	-1.4176	0.374335	fepE	3.6436e-23	3.6376e-23	TRUE	Ferric enterobactin transport protein FepE
LILKMKPI_03239	1.14906	6.96116	-2.5989	0.165064	sugC	0.0035126	0.0012077	TRUE	Trehalose import ATP-binding protein SugC
LILKMKPI_03240	9.19249	27.5484	-1.5834	0.333695	yesO	9.8782e-07	4.7101e-07	TRUE	Putative ABC transporter substrate-binding protein YesO
LILKMKPI_03242	5.36229	24.1419	-2.1706	0.222118	ogl	2.8864e-07	1.4299e-07	TRUE	Oligogalacturonate lyase
LILKMKPI_03245	16.8529	100.567	-2.5771	0.167577	--	1.8223e-28	2.0218e-28	TRUE	hypothetical protein
LILKMKPI_03249	67.0286	137.89	-1.0407	0.486092	--	7.7716e-21	7.1768e-21	TRUE	hypothetical protein
LILKMKPI_03260	40.9832	87.8292	-1.0997	0.466614	--	2.4375e-14	1.7696e-14	TRUE	hypothetical protein
LILKMKPI_03271	79.6683	245.418	-1.6232	0.324615	ygfZ	3.3882e-49	5.7149e-49	TRUE	tRNA-modifying protein YgfZ
LILKMKPI_03273	13.0227	52.579	-2.0135	0.247672	--	1.6064e-13	1.1258e-13	TRUE	hypothetical protein
LILKMKPI_03277	94.6061	1337.28	-3.8212	0.0707464	gcvP	0	0	TRUE	Glycine dehydrogenase (decarboxylating)
LILKMKPI_03278	24.1303	636.724	-4.7218	0.0378963	gcvH	2.7989e-213	2.0043e-212	TRUE	Glycine cleavage system H protein
LILKMKPI_03279	37.153	1009.37	-4.7638	0.0368089	gcvT	0	0	TRUE	Aminomethyltransferase
LILKMKPI_03297	71.6248	198.912	-1.4736	0.360083	loiP	1.5827e-37	2.1719e-37	TRUE	Metalloprotease LoiP
LILKMKPI_03302	73.5399	172.104	-1.2267	0.427294	galP	1.0378e-28	1.1546e-28	TRUE	Galactose-proton symporter
LILKMKPI_03303	12.2567	45.0254	-1.8772	0.272212	sprT	2.7443e-11	1.7322e-11	TRUE	Protein SprT
LILKMKPI_03305	9.57551	21.7722	-1.1851	0.439794	rsmE	9.4922e-05	3.8318e-05	TRUE	Ribosomal RNA small subunit methyltransferase E
LILKMKPI_03309	74.306	152.701	-1.0392	0.486597	--	7.0244e-23	6.9338e-23	TRUE	hypothetical protein
LILKMKPI_03321	46.7285	236.976	-2.3424	0.197182	ygiN	4.5486e-61	9.3795e-61	TRUE	putative quinol monooxygenase YgiN
LILKMKPI_03325	59.7512	189.284	-1.6635	0.315672	cpdA_1	5.1404e-39	7.2435e-39	TRUE	3'%2C5'-cyclic adenosine monophosphate phosphodiesterase CpdA
LILKMKPI_03327	24.5133	72.1295	-1.557	0.339857	nudF	3.5548e-15	2.6744e-15	TRUE	ADP-ribose pyrophosphatase
LILKMKPI_03328	144.016	631.392	-2.1323	0.228094	tolC	5.5541e-150	2.7344e-149	TRUE	Outer membrane protein TolC
LILKMKPI_03336	72.0079	168.845	-1.2295	0.426465	glnE	3.0414e-28	3.3601e-28	TRUE	Bifunctional glutamine synthetase adenylyltransferase/adenylyl-removing enzyme
LILKMKPI_03341	3.44718	8.44226	-1.2922	0.408328	folB	0.012055	0.003876	TRUE	Dihydroneopterin aldolase
LILKMKPI_03347	17.2359	163.81	-3.2485	0.105221	--	5.0117e-51	8.7147e-51	TRUE	hypothetical protein
LILKMKPI_03348	111.076	269.708	-1.2799	0.411824	mug	2.1505e-45	3.3948e-45	TRUE	G/U mismatch-specific DNA glycosylase
LILKMKPI_03350	6.51135	17.9213	-1.4606	0.363342	--	0.00012815	5.106e-05	TRUE	hypothetical protein
LILKMKPI_03351	6.89437	39.6934	-2.5254	0.173692	--	4.8565e-12	3.18e-12	TRUE	hypothetical protein
LILKMKPI_03353	52.8568	120.858	-1.1931	0.437362	fni	2.9748e-20	2.6873e-20	TRUE	Isopentenyl-diphosphate delta-isomerase
LILKMKPI_03356	23.3643	48.7281	-1.0605	0.479466	crtI	2.0931e-08	1.1224e-08	TRUE	Phytoene desaturase (lycopene-forming)
LILKMKPI_03362	15.7038	39.8416	-1.3432	0.394145	yjiA	3.1367e-08	1.6661e-08	TRUE	putative GTP-binding protein YjiA
LILKMKPI_03363	8.80947	18.0694	-1.0364	0.487543	--	0.00071421	0.00026487	TRUE	hypothetical protein
LILKMKPI_03370	3.06416	9.92336	-1.6953	0.30879	yggX	0.0025906	0.00090294	TRUE	putative Fe(2+)-trafficking protein
LILKMKPI_03372	1.9151	7.84982	-2.0352	0.243974	citG	0.0042163	0.0014365	TRUE	2-(5''-triphosphoribosyl)-3'-dephosphocoenzyme-A synthase
LILKMKPI_03378	0	6.36872	-3.0555	0.120283	--	0.0035049	0.0012056	TRUE	--
LILKMKPI_03380	13.0227	75.2398	-2.5305	0.173079	citA	1.7475e-21	1.6544e-21	TRUE	Sensor histidine kinase CitA
LILKMKPI_03381	4.21323	41.0264	-3.2836	0.102692	citB	4.7928e-14	3.4415e-14	TRUE	Transcriptional regulatory protein CitB
LILKMKPI_03403	7.27739	15.5515	-1.0956	0.467941	--	0.0013549	0.00048644	TRUE	hypothetical protein
LILKMKPI_03406	18.385	51.5422	-1.4872	0.356704	glcR	6.1792e-11	3.8447e-11	TRUE	HTH-type transcriptional repressor GlcR
LILKMKPI_03412	16.0869	35.9907	-1.1617	0.446986	rclR_4	6.3112e-07	3.0555e-07	TRUE	RCS-specific HTH-type transcriptional activator RclR
LILKMKPI_03416	27.1945	802.607	-4.8833	0.0338829	--	1.4344e-268	1.2416e-267	TRUE	hypothetical protein
LILKMKPI_03417	90.3928	214.907	-1.2494	0.420623	grxB_2	6.6994e-36	8.7806e-36	TRUE	Glutaredoxin 2
LILKMKPI_03418	8.42645	45.3216	-2.4272	0.185926	--	3.0419e-13	2.0982e-13	TRUE	hypothetical protein
LILKMKPI_03419	15.3208	78.4982	-2.3572	0.19517	treR	1.9431e-21	1.833e-21	TRUE	HTH-type transcriptional regulator TreR
LILKMKPI_03424	55.921	120.413	-1.1065	0.464419	nrdD	3.5905e-19	3.1707e-19	TRUE	Anaerobic ribonucleoside-triphosphate reductase
LILKMKPI_03428	8.80947	23.4014	-1.4095	0.376442	licR	1.5718e-05	6.751e-06	TRUE	putative licABCH operon regulator
LILKMKPI_03437	52.8568	265.561	-2.3289	0.199036	cybC	5.769e-68	1.2984e-67	TRUE	Soluble cytochrome b562
LILKMKPI_03445	3.83021	19.6986	-2.3626	0.19444	yjfF	1.8749e-06	8.7495e-07	TRUE	Inner membrane ABC transporter permease protein YjfF
LILKMKPI_03446	2.29812	10.3677	-2.1736	0.221657	ytfT	0.00076874	0.00028402	TRUE	Inner membrane ABC transporter permease protein YtfT
LILKMKPI_03447	3.44718	17.3289	-2.3297	0.198925	rbsA_1	8.5757e-06	3.772e-06	TRUE	Ribose import ATP-binding protein RbsA
LILKMKPI_03448	3.06416	54.2082	-4.1449	0.0565276	ytfQ	2.0171e-19	1.7893e-19	TRUE	ABC transporter periplasmic-binding protein YtfQ
LILKMKPI_03449	115.289	356.5	-1.6286	0.323402	ppa	8.0964e-71	1.8539e-70	TRUE	Inorganic pyrophosphatase
LILKMKPI_03461	44.4304	202.614	-2.1891	0.219288	tamB	2.965e-50	5.1331e-50	TRUE	Translocation and assembly module TamB
LILKMKPI_03462	45.5794	232.088	-2.3482	0.196391	tamA	6.1087e-60	1.2307e-59	TRUE	Translocation and assembly module TamA
LILKMKPI_03463	42.8983	141.593	-1.7228	0.30296	msrA	2.4244e-30	2.7879e-30	TRUE	Peptide methionine sulfoxide reductase MsrA
LILKMKPI_03465	177.338	373.829	-1.0759	0.474375	corC_4	6.5688e-55	1.2379e-54	TRUE	Magnesium and cobalt efflux protein CorC
LILKMKPI_03467	36.3869	214.019	-2.5562	0.170023	--	2.3633e-58	4.6309e-58	TRUE	hypothetical protein
LILKMKPI_03469	16.4699	62.9467	-1.9343	0.261648	cpdB	1.7318e-15	1.3231e-15	TRUE	2'%2C3'-cyclic-nucleotide 2'-phosphodiesterase/3'-nucleotidase
LILKMKPI_03472	4.21323	13.7742	-1.709	0.305872	--	0.0003712	0.00014126	TRUE	hypothetical protein
LILKMKPI_03474	28.3435	111.379	-1.9744	0.254476	--	1.4897e-26	1.5987e-26	TRUE	hypothetical protein
LILKMKPI_03486	33.7058	279.483	-3.0517	0.1206	bsmA	2.6915e-83	7.413e-83	TRUE	Lipoprotein BsmA
LILKMKPI_03489	32.1737	213.574	-2.7308	0.150642	aidB	1.7615e-60	3.5853e-60	TRUE	Putative acyl-CoA dehydrogenase AidB
LILKMKPI_03518	49.4096	242.456	-2.2949	0.203782	frdA	1.2399e-61	2.5839e-61	TRUE	Fumarate reductase flavoprotein subunit
LILKMKPI_03519	8.80947	69.7598	-2.9853	0.12628	frdB	7.5495e-22	7.217e-22	TRUE	Fumarate reductase iron-sulfur subunit
LILKMKPI_03520	3.83021	24.4381	-2.6736	0.156735	frdC	3.4835e-08	1.8428e-08	TRUE	Fumarate reductase subunit C
LILKMKPI_03521	39.4511	129.596	-1.7159	0.304413	frdD	7.7926e-28	8.5611e-28	TRUE	Fumarate reductase subunit D
LILKMKPI_03522	112.991	493.354	-2.1264	0.229029	blc	2.1101e-117	8.2693e-117	TRUE	Outer membrane lipoprotein Blc
LILKMKPI_03524	6.89437	45.0254	-2.7072	0.153127	rcsA_2	5.7621e-14	4.115e-14	TRUE	Transcriptional regulatory protein RcsA
LILKMKPI_03525	70.8588	868.516	-3.6155	0.081588	--	5.7511e-274	5.2071e-273	TRUE	hypothetical protein
LILKMKPI_03529	34.0888	109.305	-1.681	0.311866	--	2.1196e-23	2.1242e-23	TRUE	hypothetical protein
LILKMKPI_03533	3.83021	14.9591	-1.9655	0.25605	--	9.5365e-05	3.8464e-05	TRUE	hypothetical protein
LILKMKPI_03534	435.111	3463.25	-2.9927	0.125634	aspA	0	0	TRUE	Aspartate ammonia-lyase
LILKMKPI_03535	11.4906	179.213	-3.9631	0.0641192	dcuA	1.0253e-59	2.0499e-59	TRUE	Anaerobic C4-dicarboxylate transporter DcuA
LILKMKPI_03538	84.6475	201.578	-1.2518	0.419924	betI_3	7.9812e-34	1.0075e-33	TRUE	HTH-type transcriptional regulator BetI
LILKMKPI_03612	50.9417	168.845	-1.7288	0.301703	yghU	6.0533e-36	7.9603e-36	TRUE	Disulfide-bond oxidoreductase YghU
LILKMKPI_03622	6.51135	26.956	-2.0496	0.241551	hokB_3	1.0627e-07	5.3937e-08	TRUE	Toxin HokB
LILKMKPI_03630	44.8134	139.52	-1.6385	0.32119	yfcG_2	6.7833e-29	7.6007e-29	TRUE	Disulfide-bond oxidoreductase YfcG
LILKMKPI_03641	75.455	159.662	-1.0813	0.472603	--	1.6537e-24	1.7028e-24	TRUE	hypothetical protein
LILKMKPI_03647	133.291	309.402	-1.2149	0.430803	qorA	6.685e-50	1.1497e-49	TRUE	Quinone oxidoreductase 1
LILKMKPI_03650	36.0039	517.348	-3.8449	0.0695937	--	2.3552e-167	1.2883e-166	TRUE	hypothetical protein
LILKMKPI_03656	19.9171	39.8416	-1.0003	0.499896	dgkA	7.033e-07	3.3835e-07	TRUE	Diacylglycerol kinase
LILKMKPI_03661	19.151	81.9048	-2.0965	0.233825	lamB_3	9.7317e-21	8.9136e-21	TRUE	Maltoporin
LILKMKPI_03662	4.59625	13.0337	-1.5037	0.352648	malK_3	0.00096007	0.00034963	TRUE	Maltose/maltodextrin import ATP-binding protein MalK
LILKMKPI_03663	1.9151	15.4034	-3.0078	0.124326	malE	6.1118e-06	2.7261e-06	TRUE	Maltose-binding periplasmic protein
LILKMKPI_03672	160.486	542.971	-1.7584	0.295576	pgi	5.6633e-113	2.1142e-112	TRUE	Glucose-6-phosphate isomerase
LILKMKPI_03673	20.3001	51.246	-1.336	0.396117	lysC	3.7715e-10	2.2472e-10	TRUE	Lysine-sensitive aspartokinase 3
LILKMKPI_03683	7.66041	19.1062	-1.3185	0.400952	--	0.00014153	5.619e-05	TRUE	hypothetical protein
LILKMKPI_03686	22.5982	47.9876	-1.0865	0.470902	iclR	2.01e-08	1.0815e-08	TRUE	Transcriptional repressor IclR
LILKMKPI_03702	9.95853	53.3196	-2.4207	0.186766	dprA	2.7203e-15	2.0545e-15	TRUE	DNA processing protein DprA
LILKMKPI_03706	73.5399	161.144	-1.1317	0.456378	trkA	1.6422e-25	1.7271e-25	TRUE	Trk system potassium uptake protein TrkA
LILKMKPI_03707	48.2606	382.716	-2.9874	0.126096	mscL	3.7195e-112	1.3691e-111	TRUE	Large-conductance mechanosensitive channel
LILKMKPI_03737	11.8736	25.3268	-1.0929	0.468818	outO	4.4025e-05	1.8214e-05	TRUE	Type 4 prepilin-like proteins leader peptide-processing enzyme
LILKMKPI_03738	155.506	896.509	-2.5273	0.173463	bfr	1.0784e-236	8.1677e-236	TRUE	Bacterioferritin
LILKMKPI_03755	14.9378	34.6577	-1.2142	0.431012	--	6.7129e-07	3.2381e-07	TRUE	TelA-like protein
LILKMKPI_03757	23.7473	54.2082	-1.1907	0.43809	--	6.8294e-10	4.0176e-10	TRUE	hypothetical protein
LILKMKPI_03758	8.80947	28.1409	-1.6755	0.313058	prs_2	4.3904e-07	2.148e-07	TRUE	Ribose-phosphate pyrophosphokinase
LILKMKPI_03763	78.5192	213.13	-1.4406	0.368414	--	1.9301e-39	2.7444e-39	TRUE	hypothetical protein
LILKMKPI_03764	365.785	956.938	-1.3874	0.382253	crp	5.3087e-166	2.8839e-165	TRUE	cAMP-activated global transcriptional regulator CRP
LILKMKPI_03772	18.385	107.528	-2.5481	0.17098	nasD_2	3.9942e-30	4.5797e-30	TRUE	Nitrite reductase [NAD(P)H]
LILKMKPI_03773	1.14906	22.957	-4.3204	0.050053	nirD	3.8965e-09	2.1971e-09	TRUE	Nitrite reductase (NADH) small subunit
LILKMKPI_03774	20.3001	45.9141	-1.1775	0.442117	cysG_2	1.5617e-08	8.4313e-09	TRUE	Siroheme synthase
LILKMKPI_03780	5.36229	26.3636	-2.2976	0.203401	yurK	4.6463e-08	2.4254e-08	TRUE	putative HTH-type transcriptional regulator YurK
LILKMKPI_03782	39.8341	87.2367	-1.1309	0.456631	trpS	1.6082e-14	1.1752e-14	TRUE	Tryptophan--tRNA ligase
LILKMKPI_03784	9.57551	27.4003	-1.5168	0.34946	rpe	1.562e-06	7.3239e-07	TRUE	Ribulose-phosphate 3-epimerase
LILKMKPI_03800	126.397	2035.62	-4.0094	0.0620941	pckA	0	0	TRUE	Phosphoenolpyruvate carboxykinase (ATP)
LILKMKPI_03801	47.8776	129.3	-1.4333	0.370283	envZ	1.6953e-24	1.7434e-24	TRUE	Osmolarity sensor protein EnvZ
LILKMKPI_03802	78.1362	219.943	-1.4931	0.355248	ompR	1.054e-41	1.549e-41	TRUE	Transcriptional regulatory protein OmpR
LILKMKPI_03803	7.27739	16.144	-1.1495	0.450781	greB	0.00089	0.00032607	TRUE	Transcription elongation factor GreB
LILKMKPI_03805	6.12833	19.5505	-1.6736	0.31347	feoA	2.5713e-05	1.0889e-05	TRUE	Fe(2+) transport protein A
LILKMKPI_03806	59.3682	122.043	-1.0396	0.486462	feoB	1.3089e-18	1.1281e-18	TRUE	Fe(2+) transporter FeoB
LILKMKPI_03808	633.899	4419.45	-2.8015	0.143438	bhsA_5	0	0	TRUE	Multiple stress resistance protein BhsA
LILKMKPI_03813	68.1777	224.831	-1.7215	0.303233	malQ	3.8045e-47	6.1791e-47	TRUE	4-alpha-glucanotransferase
LILKMKPI_03814	26.8114	109.601	-2.0313	0.244635	malP_2	1.1907e-26	1.2813e-26	TRUE	Maltodextrin phosphorylase
LILKMKPI_03815	86.9457	512.756	-2.5601	0.169564	malT	2.6961e-137	1.2347e-136	TRUE	HTH-type transcriptional regulator MalT
LILKMKPI_03816	59.3682	120.858	-1.0255	0.49124	glpR_2	2.8167e-18	2.3935e-18	TRUE	Glycerol-3-phosphate regulon repressor
LILKMKPI_03822	608.62	1581.67	-1.3778	0.384805	malP_3	1.0604e-271	9.4916e-271	TRUE	Maltodextrin phosphorylase
LILKMKPI_03823	400.639	850.743	-1.0864	0.470935	glgA	1.8081e-123	7.496e-123	TRUE	Glycogen synthase
LILKMKPI_03827	106.097	293.406	-1.4675	0.361608	asd	2.3304e-54	4.3294e-54	TRUE	Aspartate-semialdehyde dehydrogenase
LILKMKPI_03835	68.9437	155.071	-1.1694	0.444606	yhhX	3.5416e-25	3.7048e-25	TRUE	putative oxidoreductase YhhX
LILKMKPI_03836	5.36229	13.0337	-1.2813	0.411425	speG_2	0.0018741	0.00066022	TRUE	Spermidine N(1)-acetyltransferase
LILKMKPI_03837	98.8193	242.456	-1.2949	0.407564	ggt	2.5032e-41	3.6515e-41	TRUE	Gamma-glutamyltranspeptidase
LILKMKPI_03847	11.1076	23.2533	-1.0659	0.477675	livH_3	0.00010508	4.2186e-05	TRUE	High-affinity branched-chain amino acid transport system permease protein LivH
LILKMKPI_03848	6.51135	25.0306	-1.9427	0.260129	livK	4.991e-07	2.4359e-07	TRUE	Leucine-specific-binding protein
LILKMKPI_03850	73.1569	291.925	-1.9965	0.250607	livJ	2.5888e-67	5.7768e-67	TRUE	Leu/Ile/Val-binding protein
LILKMKPI_03851	23.3643	82.4972	-1.82	0.283221	tyrP_2	4.8944e-19	4.3076e-19	TRUE	Tyrosine-specific transport protein
LILKMKPI_03852	77.3701	327.027	-2.0796	0.23658	puuE	2.677e-77	6.737e-77	TRUE	4-aminobutyrate aminotransferase PuuE
LILKMKPI_03860	40.2172	110.49	-1.458	0.363997	--	2.025e-21	1.908e-21	TRUE	hypothetical protein
LILKMKPI_03875	40.9832	226.46	-2.4662	0.180967	uspB	2.4961e-60	5.0675e-60	TRUE	Universal stress protein B
LILKMKPI_03876	106.863	1557.08	-3.865	0.0686308	uspA	0	0	TRUE	Universal stress protein A
LILKMKPI_03881	16.4699	35.3983	-1.1038	0.465289	--	1.2501e-06	5.9034e-07	TRUE	hypothetical protein
LILKMKPI_03882	4.97927	10.5158	-1.0786	0.473488	ydaF_2	0.0088033	0.0028918	TRUE	Putative ribosomal N-acetyltransferase YdaF
LILKMKPI_03886	60.1342	156.404	-1.379	0.384485	yhjD	1.6892e-28	1.8768e-28	TRUE	Inner membrane protein YhjD
LILKMKPI_03887	14.1718	33.0285	-1.2207	0.429074	yhjE_2	1.1683e-06	5.5304e-07	TRUE	Inner membrane metabolite transport protein YhjE
LILKMKPI_03890	1.9151	6.66494	-1.7992	0.287334	yhjH	0.011629	0.003751	TRUE	Cyclic di-GMP phosphodiesterase YhjH
LILKMKPI_03893	10.3416	296.072	-4.8394	0.0349297	dctA	2.489e-100	8.0683e-100	TRUE	Aerobic C4-dicarboxylate transport protein
LILKMKPI_03896	38.6851	106.639	-1.4629	0.362763	bcsZ	8.9082e-21	8.1879e-21	TRUE	Endoglucanase
LILKMKPI_03897	69.3267	263.043	-1.9238	0.263559	bcsB	2.6436e-59	5.2452e-59	TRUE	Cyclic di-GMP-binding protein
LILKMKPI_03898	102.266	335.913	-1.7158	0.304434	bcsA	2.1992e-69	4.9923e-69	TRUE	Cellulose synthase catalytic subunit [UDP-forming]
LILKMKPI_03899	40.2172	133.447	-1.7304	0.301368	parA_1	8.8446e-29	9.8682e-29	TRUE	Chromosome partitioning protein ParA
LILKMKPI_03900	7.27739	33.7691	-2.2142	0.215506	--	1.0031e-09	5.8484e-10	TRUE	hypothetical protein
LILKMKPI_03901	97.6702	228.089	-1.2236	0.428213	--	1.9568e-37	2.676e-37	TRUE	hypothetical protein
LILKMKPI_03904	42.5153	105.158	-1.3065	0.404301	oppF_2	5.7193e-19	5.0001e-19	TRUE	Oligopeptide transport ATP-binding protein OppF
LILKMKPI_03905	24.8963	92.2725	-1.89	0.269807	oppD_2	1.2115e-21	1.1525e-21	TRUE	Oligopeptide transport ATP-binding protein OppD
LILKMKPI_03906	19.151	61.6137	-1.6858	0.310831	dppC	6.826e-14	4.8484e-14	TRUE	Dipeptide transport system permease protein DppC
LILKMKPI_03907	22.5982	87.2367	-1.9487	0.25905	dppB_2	5.7402e-21	5.3258e-21	TRUE	Dipeptide transport system permease protein DppB
LILKMKPI_03908	67.0286	1038.99	-3.9543	0.0645115	dppA_3	0	0	TRUE	Periplasmic dipeptide transport protein
LILKMKPI_03909	7.27739	24.5862	-1.7564	0.295986	--	1.5563e-06	7.3016e-07	TRUE	hypothetical protein
LILKMKPI_03910	1.9151	10.2196	-2.4158	0.187401	--	0.00054472	0.00020433	TRUE	hypothetical protein
LILKMKPI_03915	12.2567	64.724	-2.4007	0.189373	lip-1_3	3.8031e-18	3.2143e-18	TRUE	Lipase 1
LILKMKPI_03916	5.36229	27.2522	-2.3455	0.196759	tag	2.2299e-08	1.1917e-08	TRUE	DNA-3-methyladenine glycosylase 1
LILKMKPI_03919	16.8529	37.9161	-1.1698	0.444483	yiaD	2.9572e-07	1.4632e-07	TRUE	putative lipoprotein YiaD
LILKMKPI_03921	8.80947	41.4708	-2.235	0.212421	kdgR_2	1.1137e-11	7.1907e-12	TRUE	HTH-type transcriptional regulator KdgR
LILKMKPI_03922	7.66041	29.4739	-1.9439	0.259913	--	4.8732e-08	2.5371e-08	TRUE	hypothetical protein
LILKMKPI_03923	6.89437	26.5117	-1.9431	0.260057	kdgK_2	2.2952e-07	1.145e-07	TRUE	2-dehydro-3-deoxygluconokinase
LILKMKPI_03925	10.7246	24.7343	-1.2056	0.433589	ttuB_2	2.8263e-05	1.195e-05	TRUE	Putative tartrate transporter
LILKMKPI_03928	138.27	1242.2	-3.1673	0.111313	--	0	0	TRUE	hypothetical protein
LILKMKPI_03931	15.7038	66.2051	-2.0758	0.237204	--	5.8833e-17	4.7434e-17	TRUE	hypothetical protein
LILKMKPI_03934	0	5.92439	-2.9512	0.129301	pncA_2	0.005255	0.0017682	TRUE	Nicotinamidase
LILKMKPI_03935	11.1076	50.2092	-2.1764	0.221227	xylB	1.3025e-13	9.1524e-14	TRUE	Xylulose kinase
LILKMKPI_03936	3.44718	23.2533	-2.7539	0.14825	xylA	5.766e-08	2.9803e-08	TRUE	Xylose isomerase
LILKMKPI_03937	1.14906	10.5158	-3.194	0.109272	xylF	0.00014941	5.9142e-05	TRUE	D-xylose-binding periplasmic protein
LILKMKPI_03940	16.4699	66.2051	-2.0071	0.248773	xylR	1.3406e-16	1.0592e-16	TRUE	Xylose operon regulatory protein
LILKMKPI_03951	3.44718	12.145	-1.8169	0.28383	slmA_1	0.00063032	0.00023487	TRUE	Nucleoid occlusion factor SlmA
LILKMKPI_03952	13.0227	30.0663	-1.2071	0.433138	yhdN_2	3.8652e-06	1.7599e-06	TRUE	General stress protein 69
LILKMKPI_03981	57.0701	131.373	-1.2029	0.434401	--	5.3252e-22	5.1406e-22	TRUE	hypothetical protein
LILKMKPI_03982	55.155	278.891	-2.3381	0.197771	tdh	1.8323e-71	4.2828e-71	TRUE	L-threonine 3-dehydrogenase
LILKMKPI_03983	46.3455	203.503	-2.1345	0.227746	kbl	1.2218e-49	2.0877e-49	TRUE	2-amino-3-ketobutyrate coenzyme A ligase
LILKMKPI_03989	51.7078	150.776	-1.544	0.342933	epsD	8.0744e-30	9.2311e-30	TRUE	Putative glycosyltransferase EpsD
LILKMKPI_04006	85.7966	174.622	-1.0252	0.491342	--	1.079e-25	1.1393e-25	TRUE	hypothetical protein
LILKMKPI_04016	6.51135	13.7742	-1.0809	0.472734	fimD_3	0.0026949	0.00093804	TRUE	Outer membrane usher protein FimD
LILKMKPI_04020	2.29812	7.84982	-1.7722	0.292762	--	0.0064631	0.0021545	TRUE	hypothetical protein
LILKMKPI_04022	45.1964	115.526	-1.3539	0.391233	--	3.3441e-21	3.1173e-21	TRUE	hypothetical protein
LILKMKPI_04028	12.2567	35.102	-1.518	0.34917	glpR_3	5.3863e-08	2.8005e-08	TRUE	Glycerol-3-phosphate regulon repressor
LILKMKPI_04038	5.74531	14.3667	-1.3223	0.399897	ompL	0.00095522	0.00034803	TRUE	Porin OmpL
LILKMKPI_04051	6.51135	33.6209	-2.3683	0.193674	--	4.6069e-10	2.7326e-10	TRUE	hypothetical protein
LILKMKPI_04052	14.5548	335.469	-4.5266	0.0433868	--	6.1813e-113	2.2967e-112	TRUE	hypothetical protein
LILKMKPI_04063	17.6189	155.071	-3.1377	0.113621	rbsB	1.1933e-47	1.9542e-47	TRUE	Ribose import binding protein RbsB
LILKMKPI_04077	67.0286	179.509	-1.4212	0.373402	atpE	3.6303e-33	4.5247e-33	TRUE	ATP synthase subunit c
LILKMKPI_04082	309.481	718.629	-1.2154	0.430654	atpD	1.6611e-113	6.2306e-113	TRUE	ATP synthase subunit beta
LILKMKPI_04087	0	18.9581	-5.6292	0.0202042	--	9.1988e-08	4.7052e-08	TRUE	hypothetical protein
LILKMKPI_04093	34.0888	86.1999	-1.3384	0.395459	axe1-6A	4.3388e-16	3.4007e-16	TRUE	Carbohydrate acetyl esterase/feruloyl esterase
LILKMKPI_04096	34.0888	87.8292	-1.3654	0.388127	chrR	1.3739e-16	1.0844e-16	TRUE	Chromate reductase
LILKMKPI_04097	33.7058	67.9824	-1.0122	0.49579	--	7.6355e-11	4.721e-11	TRUE	hypothetical protein
LILKMKPI_04098	42.5153	234.458	-2.4633	0.181331	yofA	2.3726e-62	4.997e-62	TRUE	HTH-type transcriptional regulator YofA
LILKMKPI_04106	1.14906	8.59037	-2.9023	0.133758	--	0.00082004	0.00030213	TRUE	hypothetical protein
LILKMKPI_04107	3.06416	12.4412	-2.0216	0.246285	--	0.00032569	0.00012472	TRUE	hypothetical protein
LILKMKPI_04232	6.12833	12.5893	-1.0386	0.4868	--	0.0047005	0.0015925	TRUE	hypothetical protein
LILKMKPI_04455	62.4323	450.106	-2.8499	0.138706	treZ	2.3381e-128	1.0119e-127	TRUE	Malto-oligosyltrehalose trehalohydrolase
LILKMKPI_04456	58.9852	443.589	-2.9108	0.132973	treY	5.8788e-128	2.5167e-127	TRUE	Maltooligosyl trehalose synthase
LILKMKPI_04457	43.6643	333.692	-2.934	0.130851	glgX_2	3.8823e-97	1.2135e-96	TRUE	Glycogen operon protein GlgX
LILKMKPI_04460	7.27739	30.5106	-2.0678	0.238523	roxA_2	1.4054e-08	7.6293e-09	TRUE	50S ribosomal protein L16 3-hydroxylase
LILKMKPI_04466	2.68114	26.6598	-3.3137	0.100572	--	1.1411e-09	6.6191e-10	TRUE	hypothetical protein
LILKMKPI_04467	11.1076	31.8436	-1.5195	0.348807	gst	2.2024e-07	1.1022e-07	TRUE	Glutathione S-transferase GST-4.5
LILKMKPI_04468	21.0661	100.27	-2.2509	0.210093	guaD	3.5065e-26	3.7325e-26	TRUE	Guanine deaminase
LILKMKPI_04469	11.4906	74.7955	-2.7025	0.153627	--	3.7068e-22	3.6048e-22	TRUE	hypothetical protein
LILKMKPI_04474	4.59625	28.1409	-2.6141	0.163334	--	4.1251e-09	2.321e-09	TRUE	hypothetical protein
LILKMKPI_04475	16.0869	67.5381	-2.0698	0.238193	csgA	3.096e-17	2.5378e-17	TRUE	C-factor
LILKMKPI_04477	4.21323	9.62714	-1.1922	0.437635	--	0.0092873	0.0030368	TRUE	hypothetical protein
LILKMKPI_04480	2.68114	8.88659	-1.7288	0.301703	--	0.0040867	0.0013936	TRUE	hypothetical protein
LILKMKPI_04491	4.97927	19.8467	-1.9949	0.250885	--	6.2376e-06	2.7791e-06	TRUE	hypothetical protein
LILKMKPI_04503	6.89437	31.2512	-2.1804	0.220615	lysN_2	5.0231e-09	2.8042e-09	TRUE	2-aminoadipate transaminase
LILKMKPI_04512	0	8.59037	-4.1027	0.0582055	--	0.00033899	0.00012969	TRUE	hypothetical protein
LILKMKPI_04516	19.9171	41.767	-1.0684	0.476848	mngR_3	1.9655e-07	9.8553e-08	TRUE	Mannosyl-D-glycerate transport/metabolism system repressor MngR
LILKMKPI_04532	13.4057	29.1776	-1.122	0.459456	--	9.5253e-06	4.18e-06	TRUE	hypothetical protein
LILKMKPI_04542	23.7473	53.4677	-1.1709	0.444144	--	1.133e-09	6.5768e-10	TRUE	hypothetical protein
LILKMKPI_04551	3.44718	8.44226	-1.2922	0.408328	--	0.012055	0.003876	TRUE	hypothetical protein
LILKMKPI_04552	7.27739	22.0684	-1.6005	0.329763	--	1.0936e-05	4.7698e-06	TRUE	hypothetical protein
LILKMKPI_04553	11.4906	44.2849	-1.9464	0.259463	pla	2.2222e-11	1.4094e-11	TRUE	Coagulase/fibrinolysin
LILKMKPI_04561	35.6209	336.506	-3.2398	0.105858	parA_3	9.531e-103	3.1947e-102	TRUE	Plasmid partition protein A
LILKMKPI_04562	20.3001	69.6116	-1.7778	0.291628	virB_2	4.6885e-16	3.6675e-16	TRUE	Virulence regulon transcriptional activator VirB

## Sheet: Significantly Enriched GO terms
Table S2 Transcriptional analyses of desiccated C. sakazakii G4023
GO_accession	Description	Term_type	pValue	DEG_item	DEG_list	Bg_item	Bg_list	Up	Up_Gene_names	Down	Down_Gene_names
GO:0010467	gene expression	biological_process	0.033265	266	1140	678	3137	132	LILKMKPI_02922,LILKMKPI_04070,LILKMKPI_01844,LILKMKPI_03649,LILKMKPI_00245,LILKMKPI_01950,LILKMKPI_01467,LILKMKPI_01201,LILKMKPI_00346,LILKMKPI_01815,LILKMKPI_03033,LILKMKPI_03720,LILKMKPI_01015,LILKMKPI_01105,LILKMKPI_03021,LILKMKPI_03632,LILKMKPI_01660,LILKMKPI_02376,LILKMKPI_02296,LILKMKPI_02692,LILKMKPI_02942,LILKMKPI_00550,LILKMKPI_03029,LILKMKPI_02298,LILKMKPI_00389,LILKMKPI_01471,LILKMKPI_…	134	LILKMKPI_02024,LILKMKPI_03906,LILKMKPI_04460,LILKMKPI_01159,LILKMKPI_02479,LILKMKPI_03489,LILKMKPI_01400,LILKMKPI_04087,LILKMKPI_03940,LILKMKPI_00287,LILKMKPI_00103,LILKMKPI_03921,LILKMKPI_00248,LILKMKPI_01172,LILKMKPI_01121,LILKMKPI_00124,LILKMKPI_01675,LILKMKPI_00871,LILKMKPI_02240,LILKMKPI_03816,LILKMKPI_01821,LILKMKPI_01298,LILKMKPI_02063,LILKMKPI_01364,LILKMKPI_01652,LILKMKPI_03325,LILKMKPI_…
GO:0009059	macromolecule biosynthetic process	biological_process	0.02886	245	1140	619	3137	116	LILKMKPI_03484,LILKMKPI_03718,LILKMKPI_03034,LILKMKPI_00964,LILKMKPI_03636,LILKMKPI_02997,LILKMKPI_01264,LILKMKPI_00191,LILKMKPI_00267,LILKMKPI_00383,LILKMKPI_04526,LILKMKPI_03712,LILKMKPI_00269,LILKMKPI_04071,LILKMKPI_03711,LILKMKPI_00656,LILKMKPI_00232,LILKMKPI_03726,LILKMKPI_02762,LILKMKPI_03482,LILKMKPI_03721,LILKMKPI_01453,LILKMKPI_00403,LILKMKPI_01461,LILKMKPI_03517,LILKMKPI_00767,LILKMKPI_…	129	LILKMKPI_04516,LILKMKPI_03424,LILKMKPI_00125,LILKMKPI_03782,LILKMKPI_01753,LILKMKPI_04457,LILKMKPI_04028,LILKMKPI_03521,LILKMKPI_01366,LILKMKPI_03087,LILKMKPI_02952,LILKMKPI_03192,LILKMKPI_02373,LILKMKPI_03225,LILKMKPI_00133,LILKMKPI_00826,LILKMKPI_03309,LILKMKPI_02192,LILKMKPI_01676,LILKMKPI_01975,LILKMKPI_03380,LILKMKPI_04503,LILKMKPI_03406,LILKMKPI_03905,LILKMKPI_03428,LILKMKPI_02355,LILKMKPI_…
GO:0034645	cellular macromolecule biosynthetic process	biological_process	0.014304	244	1140	608	3137	116	LILKMKPI_00599,LILKMKPI_00762,LILKMKPI_02185,LILKMKPI_00272,LILKMKPI_02964,LILKMKPI_01009,LILKMKPI_00162,LILKMKPI_02000,LILKMKPI_03655,LILKMKPI_03722,LILKMKPI_00564,LILKMKPI_03728,LILKMKPI_01870,LILKMKPI_02811,LILKMKPI_03734,LILKMKPI_00616,LILKMKPI_03345,LILKMKPI_00533,LILKMKPI_03731,LILKMKPI_02717,LILKMKPI_03719,LILKMKPI_02186,LILKMKPI_03714,LILKMKPI_00226,LILKMKPI_03216,LILKMKPI_00145,LILKMKPI_…	128	LILKMKPI_03852,LILKMKPI_03080,LILKMKPI_01542,LILKMKPI_02248,LILKMKPI_02246,LILKMKPI_01831,LILKMKPI_00176,LILKMKPI_03048,LILKMKPI_01458,LILKMKPI_00467,LILKMKPI_00359,LILKMKPI_03088,LILKMKPI_03235,LILKMKPI_01234,LILKMKPI_00536,LILKMKPI_01652,LILKMKPI_04098,LILKMKPI_03325,LILKMKPI_01020,LILKMKPI_01364,LILKMKPI_02063,LILKMKPI_02856,LILKMKPI_02571,LILKMKPI_01351,LILKMKPI_03816,LILKMKPI_03931,LILKMKPI_…
GO:0044267	cellular protein metabolic process	biological_process	0.019953	89	1140	206	3137	62	LILKMKPI_00616,LILKMKPI_02068,LILKMKPI_03734,LILKMKPI_03770,LILKMKPI_04007,LILKMKPI_02811,LILKMKPI_00575,LILKMKPI_03725,LILKMKPI_01260,LILKMKPI_03728,LILKMKPI_01346,LILKMKPI_00767,LILKMKPI_03722,LILKMKPI_00347,LILKMKPI_03216,LILKMKPI_00145,LILKMKPI_03517,LILKMKPI_03482,LILKMKPI_03721,LILKMKPI_03719,LILKMKPI_01453,LILKMKPI_00403,LILKMKPI_03714,LILKMKPI_00232,LILKMKPI_03726,LILKMKPI_03731,LILKMKPI_…	27	LILKMKPI_00052,LILKMKPI_03931,LILKMKPI_02571,LILKMKPI_01812,LILKMKPI_01364,LILKMKPI_03428,LILKMKPI_01142,LILKMKPI_00478,LILKMKPI_04063,LILKMKPI_01121,LILKMKPI_02240,LILKMKPI_00871,LILKMKPI_01857,LILKMKPI_03158,LILKMKPI_01652,LILKMKPI_01234,LILKMKPI_03782,LILKMKPI_00467,LILKMKPI_03362,LILKMKPI_03424,LILKMKPI_04469,LILKMKPI_00504,LILKMKPI_02024,LILKMKPI_04232,LILKMKPI_02479,LILKMKPI_03489,LILKMKPI_…
GO:0043603	cellular amide metabolic process	biological_process	0.0019619	74	1140	155	3137	54	LILKMKPI_00376,LILKMKPI_03720,LILKMKPI_03732,LILKMKPI_02692,LILKMKPI_02376,LILKMKPI_02942,LILKMKPI_03743,LILKMKPI_03344,LILKMKPI_01092,LILKMKPI_03730,LILKMKPI_03715,LILKMKPI_02633,LILKMKPI_00624,LILKMKPI_03676,LILKMKPI_03735,LILKMKPI_04070,LILKMKPI_00768,LILKMKPI_02284,LILKMKPI_00346,LILKMKPI_01648,LILKMKPI_03031,LILKMKPI_01253,LILKMKPI_03733,LILKMKPI_00383,LILKMKPI_03484,LILKMKPI_00272,LILKMKPI_…	20	LILKMKPI_00929,LILKMKPI_02479,LILKMKPI_03489,LILKMKPI_03940,LILKMKPI_02024,LILKMKPI_04232,LILKMKPI_03837,LILKMKPI_03234,LILKMKPI_01652,LILKMKPI_03341,LILKMKPI_00467,LILKMKPI_03782,LILKMKPI_00515,LILKMKPI_01121,LILKMKPI_00478,LILKMKPI_00871,LILKMKPI_02240,LILKMKPI_03816,LILKMKPI_03931,LILKMKPI_01364
GO:0043604	amide biosynthetic process	biological_process	0.0078502	67	1140	145	3137	51	LILKMKPI_04070,LILKMKPI_03715,LILKMKPI_02633,LILKMKPI_00624,LILKMKPI_03735,LILKMKPI_00346,LILKMKPI_02284,LILKMKPI_01648,LILKMKPI_03031,LILKMKPI_01253,LILKMKPI_03733,LILKMKPI_00768,LILKMKPI_03732,LILKMKPI_02692,LILKMKPI_02376,LILKMKPI_03720,LILKMKPI_03730,LILKMKPI_02942,LILKMKPI_03743,LILKMKPI_03344,LILKMKPI_01092,LILKMKPI_03711,LILKMKPI_04565,LILKMKPI_03726,LILKMKPI_03731,LILKMKPI_03482,LILKMKPI_…	16	LILKMKPI_04232,LILKMKPI_02024,LILKMKPI_03234,LILKMKPI_03940,LILKMKPI_00929,LILKMKPI_02479,LILKMKPI_03489,LILKMKPI_00871,LILKMKPI_02240,LILKMKPI_01121,LILKMKPI_00478,LILKMKPI_01364,LILKMKPI_03931,LILKMKPI_00467,LILKMKPI_03782,LILKMKPI_01652
GO:0006518	peptide metabolic process	biological_process	0.0057331	64	1140	136	3137	49	LILKMKPI_04070,LILKMKPI_03735,LILKMKPI_00624,LILKMKPI_03715,LILKMKPI_02633,LILKMKPI_03733,LILKMKPI_03031,LILKMKPI_00346,LILKMKPI_02284,LILKMKPI_00768,LILKMKPI_02376,LILKMKPI_02692,LILKMKPI_03732,LILKMKPI_03720,LILKMKPI_03730,LILKMKPI_01092,LILKMKPI_03344,LILKMKPI_03743,LILKMKPI_02942,LILKMKPI_03731,LILKMKPI_03726,LILKMKPI_04565,LILKMKPI_03711,LILKMKPI_03517,LILKMKPI_00145,LILKMKPI_00403,LILKMKPI_…	15	LILKMKPI_04232,LILKMKPI_02024,LILKMKPI_03837,LILKMKPI_03940,LILKMKPI_03489,LILKMKPI_02479,LILKMKPI_02240,LILKMKPI_00871,LILKMKPI_00478,LILKMKPI_01121,LILKMKPI_01364,LILKMKPI_03931,LILKMKPI_03782,LILKMKPI_00467,LILKMKPI_01652
GO:0043043	peptide biosynthetic process	biological_process	0.0049972	63	1140	133	3137	49	LILKMKPI_03730,LILKMKPI_02942,LILKMKPI_00269,LILKMKPI_01092,LILKMKPI_03344,LILKMKPI_03743,LILKMKPI_03034,LILKMKPI_03732,LILKMKPI_03718,LILKMKPI_00272,LILKMKPI_03484,LILKMKPI_02376,LILKMKPI_04567,LILKMKPI_02692,LILKMKPI_01009,LILKMKPI_03720,LILKMKPI_00383,LILKMKPI_00347,LILKMKPI_03722,LILKMKPI_03031,LILKMKPI_00767,LILKMKPI_02284,LILKMKPI_00346,LILKMKPI_03728,LILKMKPI_01260,LILKMKPI_03733,LILKMKPI_…	14	LILKMKPI_00467,LILKMKPI_03782,LILKMKPI_03940,LILKMKPI_01652,LILKMKPI_03489,LILKMKPI_02479,LILKMKPI_01364,LILKMKPI_03931,LILKMKPI_00871,LILKMKPI_04232,LILKMKPI_02240,LILKMKPI_02024,LILKMKPI_01121,LILKMKPI_00478
GO:0006412	translation	biological_process	0.0023486	61	1140	125	3137	47	LILKMKPI_03711,LILKMKPI_04070,LILKMKPI_03726,LILKMKPI_03731,LILKMKPI_03719,LILKMKPI_03721,LILKMKPI_03482,LILKMKPI_02633,LILKMKPI_03715,LILKMKPI_01453,LILKMKPI_03714,LILKMKPI_00403,LILKMKPI_00624,LILKMKPI_03735,LILKMKPI_00145,LILKMKPI_03517,LILKMKPI_00346,LILKMKPI_00767,LILKMKPI_02284,LILKMKPI_03031,LILKMKPI_03722,LILKMKPI_00347,LILKMKPI_03733,LILKMKPI_00575,LILKMKPI_03725,LILKMKPI_01260,LILKMKPI_…	14	LILKMKPI_00871,LILKMKPI_02240,LILKMKPI_04232,LILKMKPI_02024,LILKMKPI_01121,LILKMKPI_00478,LILKMKPI_01364,LILKMKPI_03931,LILKMKPI_00467,LILKMKPI_03940,LILKMKPI_03782,LILKMKPI_01652,LILKMKPI_02479,LILKMKPI_03489
GO:0006091	generation of precursor metabolites and energy	biological_process	0.038591	22	1140	43	3137	6	LILKMKPI_03854,LILKMKPI_00272,LILKMKPI_03688,LILKMKPI_00963,LILKMKPI_00151,LILKMKPI_03723	16	LILKMKPI_02428,LILKMKPI_03437,LILKMKPI_02373,LILKMKPI_03534,LILKMKPI_02384,LILKMKPI_02740,LILKMKPI_02849,LILKMKPI_02840,LILKMKPI_01040,LILKMKPI_00066,LILKMKPI_03672,LILKMKPI_02034,LILKMKPI_00156,LILKMKPI_02742,LILKMKPI_02789,LILKMKPI_00546
GO:0015980	energy derivation by oxidation of organic compounds	biological_process	0.0056741	16	1140	25	3137	5	LILKMKPI_03854,LILKMKPI_03723,LILKMKPI_00151,LILKMKPI_00963,LILKMKPI_00272	11	LILKMKPI_02849,LILKMKPI_02740,LILKMKPI_03534,LILKMKPI_02373,LILKMKPI_02428,LILKMKPI_00546,LILKMKPI_02789,LILKMKPI_02742,LILKMKPI_02034,LILKMKPI_00156,LILKMKPI_00066
GO:0045333	cellular respiration	biological_process	0.0060286	15	1140	23	3137	5	LILKMKPI_00963,LILKMKPI_00272,LILKMKPI_03723,LILKMKPI_03854,LILKMKPI_00151	10	LILKMKPI_02034,LILKMKPI_00156,LILKMKPI_03534,LILKMKPI_02428,LILKMKPI_00066,LILKMKPI_02789,LILKMKPI_00546,LILKMKPI_02740,LILKMKPI_02849,LILKMKPI_02742
GO:0019058	viral life cycle	biological_process	0.045203	15	1140	28	3137	6	LILKMKPI_03854,LILKMKPI_02403,LILKMKPI_00406,LILKMKPI_04526,LILKMKPI_03972,LILKMKPI_02457	9	LILKMKPI_00053,LILKMKPI_03074,LILKMKPI_03075,LILKMKPI_02849,LILKMKPI_04087,LILKMKPI_00871,LILKMKPI_04232,LILKMKPI_02168,LILKMKPI_03524
GO:0022900	electron transport chain	biological_process	0.00046775	11	1140	13	3137	4	LILKMKPI_00963,LILKMKPI_03688,LILKMKPI_03723,LILKMKPI_03854	7	LILKMKPI_02034,LILKMKPI_03437,LILKMKPI_00066,LILKMKPI_01040,LILKMKPI_02740,LILKMKPI_00546,LILKMKPI_02742
GO:0000105	histidine biosynthetic process	biological_process	0.040876	11	1140	19	3137	6	LILKMKPI_00314,LILKMKPI_02934,LILKMKPI_02553,LILKMKPI_02554,LILKMKPI_01822,LILKMKPI_03649	5	LILKMKPI_03353,LILKMKPI_02560,LILKMKPI_03784,LILKMKPI_01488,LILKMKPI_00129
GO:0006547	histidine metabolic process	biological_process	0.040876	11	1140	19	3137	6	LILKMKPI_01822,LILKMKPI_03649,LILKMKPI_02553,LILKMKPI_02554,LILKMKPI_02934,LILKMKPI_00314	5	LILKMKPI_00129,LILKMKPI_03784,LILKMKPI_01488,LILKMKPI_03353,LILKMKPI_02560
GO:0052803	imidazole-containing compound metabolic process	biological_process	0.040876	11	1140	19	3137	6	LILKMKPI_02553,LILKMKPI_02554,LILKMKPI_01822,LILKMKPI_03649,LILKMKPI_02934,LILKMKPI_00314	5	LILKMKPI_03784,LILKMKPI_01488,LILKMKPI_00129,LILKMKPI_03353,LILKMKPI_02560
GO:0019069	viral capsid assembly	biological_process	0.01475	10	1140	15	3137	3	LILKMKPI_02457,LILKMKPI_04526,LILKMKPI_02403	7	LILKMKPI_04232,LILKMKPI_03524,LILKMKPI_04087,LILKMKPI_03075,LILKMKPI_02849,LILKMKPI_00053,LILKMKPI_03074
GO:0019068	virion assembly	biological_process	0.027867	10	1140	16	3137	3	LILKMKPI_02403,LILKMKPI_02457,LILKMKPI_04526	7	LILKMKPI_03075,LILKMKPI_02849,LILKMKPI_00053,LILKMKPI_03074,LILKMKPI_04232,LILKMKPI_03524,LILKMKPI_04087
GO:0022904	respiratory electron transport chain	biological_process	0.0060606	8	1140	10	3137	3	LILKMKPI_03723,LILKMKPI_03854,LILKMKPI_00963	5	LILKMKPI_00546,LILKMKPI_02740,LILKMKPI_02742,LILKMKPI_02034,LILKMKPI_00066
GO:0006119	oxidative phosphorylation	biological_process	0.0046373	7	1140	8	3137	3	LILKMKPI_03854,LILKMKPI_03723,LILKMKPI_00963	4	LILKMKPI_02742,LILKMKPI_00066,LILKMKPI_02740,LILKMKPI_00546
GO:0042773	ATP synthesis coupled electron transport	biological_process	0.0046373	7	1140	8	3137	3	LILKMKPI_00963,LILKMKPI_03723,LILKMKPI_03854	4	LILKMKPI_00546,LILKMKPI_02740,LILKMKPI_02742,LILKMKPI_00066
GO:0042775	mitochondrial ATP synthesis coupled electron transport	biological_process	0.011627	6	1140	7	3137	3	LILKMKPI_03854,LILKMKPI_03723,LILKMKPI_00963	3	LILKMKPI_00066,LILKMKPI_02740,LILKMKPI_00546
GO:0016999	antibiotic metabolic process	biological_process	0.045405	6	1140	8	3137	1	LILKMKPI_00151	5	LILKMKPI_02789,LILKMKPI_03534,LILKMKPI_00156,LILKMKPI_02749,LILKMKPI_02428
GO:0006855	drug transmembrane transport	biological_process	0.029797	5	1140	6	3137	3	LILKMKPI_01329,LILKMKPI_01807,LILKMKPI_03654	2	LILKMKPI_02540,LILKMKPI_00476
GO:0006122	mitochondrial electron transport, ubiquinol to cytochrome c	biological_process	0.015118	4	1140	4	3137	3	LILKMKPI_03854,LILKMKPI_03723,LILKMKPI_00963	1	LILKMKPI_00066
GO:0098813	nuclear chromosome segregation	biological_process	0.016727	4	1140	4	3137	1	LILKMKPI_03676	3	LILKMKPI_04232,LILKMKPI_01020,LILKMKPI_03193
GO:0051049	regulation of transport	biological_process	0.043471	3	1140	3	3137	0		3	LILKMKPI_01818,LILKMKPI_00045,LILKMKPI_00667
GO:0006897	endocytosis	biological_process	0.04474	3	1140	3	3137	0		3	LILKMKPI_00045,LILKMKPI_01209,LILKMKPI_02856
GO:0098657	import into cell	biological_process	0.04474	3	1140	3	3137	0		3	LILKMKPI_02856,LILKMKPI_01209,LILKMKPI_00045
GO:0042158	lipoprotein biosynthetic process	biological_process	0.047305	3	1140	3	3137	2	LILKMKPI_00762,LILKMKPI_03216	1	LILKMKPI_02571
GO:0046474	glycerophospholipid biosynthetic process	biological_process	0.047399	3	1140	3	3137	1	LILKMKPI_00762	2	LILKMKPI_02571,LILKMKPI_01403
GO:0019064	fusion of virus membrane with host plasma membrane	biological_process	0.049222	3	1140	3	3137	1	LILKMKPI_03854	2	LILKMKPI_02168,LILKMKPI_00871
GO:0039663	membrane fusion involved in viral entry into host cell	biological_process	0.049222	3	1140	3	3137	1	LILKMKPI_03854	2	LILKMKPI_00871,LILKMKPI_02168
GO:0044800	multi-organism membrane fusion	biological_process	0.049222	3	1140	3	3137	1	LILKMKPI_03854	2	LILKMKPI_02168,LILKMKPI_00871
GO:0044803	multi-organism membrane organization	biological_process	0.049222	3	1140	3	3137	1	LILKMKPI_03854	2	LILKMKPI_02168,LILKMKPI_00871
GO:0005622	intracellular	cellular_component	0.0095565	172	1140	413	3137	94	LILKMKPI_00226,LILKMKPI_03868,LILKMKPI_00145,LILKMKPI_03719,LILKMKPI_02214,LILKMKPI_02186,LILKMKPI_03714,LILKMKPI_03731,LILKMKPI_00271,LILKMKPI_03734,LILKMKPI_00616,LILKMKPI_02811,LILKMKPI_03728,LILKMKPI_03722,LILKMKPI_03690,LILKMKPI_01009,LILKMKPI_00272,LILKMKPI_00762,LILKMKPI_02283,LILKMKPI_03735,LILKMKPI_03676,LILKMKPI_02922,LILKMKPI_00963,LILKMKPI_00759,LILKMKPI_02539,LILKMKPI_02784,LILKMKPI_…	78	LILKMKPI_02344,LILKMKPI_01121,LILKMKPI_02240,LILKMKPI_02041,LILKMKPI_00871,LILKMKPI_01598,LILKMKPI_04006,LILKMKPI_03816,LILKMKPI_03931,LILKMKPI_02571,LILKMKPI_02856,LILKMKPI_01364,LILKMKPI_03325,LILKMKPI_01020,LILKMKPI_01652,LILKMKPI_00467,LILKMKPI_00359,LILKMKPI_02312,LILKMKPI_03447,LILKMKPI_03048,LILKMKPI_02248,LILKMKPI_01831,LILKMKPI_03080,LILKMKPI_03650,LILKMKPI_02418,LILKMKPI_02024,LILKMKPI_…
GO:0044424	intracellular part	cellular_component	0.049139	154	1140	382	3137	87	LILKMKPI_01009,LILKMKPI_00272,LILKMKPI_03690,LILKMKPI_02283,LILKMKPI_00762,LILKMKPI_03731,LILKMKPI_03868,LILKMKPI_00145,LILKMKPI_02214,LILKMKPI_02186,LILKMKPI_03719,LILKMKPI_03714,LILKMKPI_03728,LILKMKPI_03722,LILKMKPI_00616,LILKMKPI_03734,LILKMKPI_02811,LILKMKPI_02692,LILKMKPI_01988,LILKMKPI_03732,LILKMKPI_01105,LILKMKPI_03720,LILKMKPI_03730,LILKMKPI_03743,LILKMKPI_00002,LILKMKPI_02715,LILKMKPI_…	67	LILKMKPI_00359,LILKMKPI_00467,LILKMKPI_03447,LILKMKPI_02312,LILKMKPI_01020,LILKMKPI_03325,LILKMKPI_01652,LILKMKPI_03650,LILKMKPI_03080,LILKMKPI_03048,LILKMKPI_01831,LILKMKPI_02240,LILKMKPI_00871,LILKMKPI_02041,LILKMKPI_01598,LILKMKPI_02344,LILKMKPI_01121,LILKMKPI_02571,LILKMKPI_02856,LILKMKPI_01364,LILKMKPI_04006,LILKMKPI_03816,LILKMKPI_03931,LILKMKPI_03940,LILKMKPI_04087,LILKMKPI_03489,LILKMKPI_…
GO:0043226	organelle	cellular_component	0.014277	113	1140	264	3137	65	LILKMKPI_03854,LILKMKPI_03031,LILKMKPI_00346,LILKMKPI_03637,LILKMKPI_01320,LILKMKPI_03733,LILKMKPI_03715,LILKMKPI_02922,LILKMKPI_03338,LILKMKPI_03735,LILKMKPI_03676,LILKMKPI_00624,LILKMKPI_01795,LILKMKPI_02539,LILKMKPI_00963,LILKMKPI_00759,LILKMKPI_03029,LILKMKPI_02715,LILKMKPI_01092,LILKMKPI_03344,LILKMKPI_03743,LILKMKPI_03730,LILKMKPI_03720,LILKMKPI_03732,LILKMKPI_03532,LILKMKPI_01988,LILKMKPI_…	48	LILKMKPI_03074,LILKMKPI_02542,LILKMKPI_01612,LILKMKPI_00466,LILKMKPI_00423,LILKMKPI_02024,LILKMKPI_01818,LILKMKPI_01979,LILKMKPI_00066,LILKMKPI_00543,LILKMKPI_02084,LILKMKPI_00248,LILKMKPI_02046,LILKMKPI_00516,LILKMKPI_03489,LILKMKPI_02479,LILKMKPI_04087,LILKMKPI_03940,LILKMKPI_03931,LILKMKPI_00634,LILKMKPI_04467,LILKMKPI_03193,LILKMKPI_04006,LILKMKPI_01364,LILKMKPI_01291,LILKMKPI_02856,LILKMKPI_…
GO:0043229	intracellular organelle	cellular_component	0.0079278	110	1140	252	3137	64	LILKMKPI_01320,LILKMKPI_03637,LILKMKPI_03733,LILKMKPI_03031,LILKMKPI_00346,LILKMKPI_03854,LILKMKPI_01795,LILKMKPI_02539,LILKMKPI_00963,LILKMKPI_00759,LILKMKPI_03735,LILKMKPI_03676,LILKMKPI_00624,LILKMKPI_03715,LILKMKPI_02922,LILKMKPI_03730,LILKMKPI_01092,LILKMKPI_03344,LILKMKPI_03743,LILKMKPI_03029,LILKMKPI_02715,LILKMKPI_02692,LILKMKPI_03732,LILKMKPI_01988,LILKMKPI_03532,LILKMKPI_03720,LILKMKPI_…	46	LILKMKPI_00466,LILKMKPI_01612,LILKMKPI_02542,LILKMKPI_03074,LILKMKPI_01979,LILKMKPI_00066,LILKMKPI_01818,LILKMKPI_02024,LILKMKPI_00423,LILKMKPI_02084,LILKMKPI_00248,LILKMKPI_02046,LILKMKPI_00543,LILKMKPI_03940,LILKMKPI_04087,LILKMKPI_03489,LILKMKPI_00516,LILKMKPI_02571,LILKMKPI_02856,LILKMKPI_01364,LILKMKPI_01291,LILKMKPI_04467,LILKMKPI_03193,LILKMKPI_04006,LILKMKPI_03931,LILKMKPI_00634,LILKMKPI_…
GO:0005737	cytoplasm	cellular_component	0.004507	104	1140	234	3137	62	LILKMKPI_00272,LILKMKPI_03484,LILKMKPI_03034,LILKMKPI_03718,LILKMKPI_01009,LILKMKPI_01228,LILKMKPI_03690,LILKMKPI_00383,LILKMKPI_02283,LILKMKPI_03035,LILKMKPI_00762,LILKMKPI_00269,LILKMKPI_03711,LILKMKPI_03687,LILKMKPI_03726,LILKMKPI_03731,LILKMKPI_03482,LILKMKPI_03721,LILKMKPI_03719,LILKMKPI_00403,LILKMKPI_03714,LILKMKPI_03723,LILKMKPI_00145,LILKMKPI_00767,LILKMKPI_00347,LILKMKPI_03722,LILKMKPI_…	42	LILKMKPI_00467,LILKMKPI_03630,LILKMKPI_01652,LILKMKPI_01753,LILKMKPI_02428,LILKMKPI_03158,LILKMKPI_02261,LILKMKPI_01831,LILKMKPI_00826,LILKMKPI_03048,LILKMKPI_00871,LILKMKPI_02751,LILKMKPI_02240,LILKMKPI_01121,LILKMKPI_02344,LILKMKPI_03406,LILKMKPI_01364,LILKMKPI_01291,LILKMKPI_02571,LILKMKPI_02856,LILKMKPI_01583,LILKMKPI_03816,LILKMKPI_03931,LILKMKPI_04467,LILKMKPI_03353,LILKMKPI_03940,LILKMKPI_…
GO:0032991	protein-containing complex	cellular_component	0.0096571	101	1140	230	3137	62	LILKMKPI_00269,LILKMKPI_03035,LILKMKPI_00383,LILKMKPI_01641,LILKMKPI_00272,LILKMKPI_03484,LILKMKPI_03034,LILKMKPI_03718,LILKMKPI_03734,LILKMKPI_02068,LILKMKPI_00382,LILKMKPI_00404,LILKMKPI_02811,LILKMKPI_03725,LILKMKPI_00575,LILKMKPI_03728,LILKMKPI_01346,LILKMKPI_00767,LILKMKPI_00347,LILKMKPI_03722,LILKMKPI_03868,LILKMKPI_03723,LILKMKPI_00145,LILKMKPI_03482,LILKMKPI_03721,LILKMKPI_03719,LILKMKPI_…	39	LILKMKPI_03048,LILKMKPI_01890,LILKMKPI_03158,LILKMKPI_03192,LILKMKPI_01020,LILKMKPI_03325,LILKMKPI_01753,LILKMKPI_00529,LILKMKPI_00467,LILKMKPI_02423,LILKMKPI_03447,LILKMKPI_02312,LILKMKPI_03193,LILKMKPI_03931,LILKMKPI_02856,LILKMKPI_01364,LILKMKPI_01121,LILKMKPI_02240,LILKMKPI_01676,LILKMKPI_02041,LILKMKPI_00871,LILKMKPI_01598,LILKMKPI_03039,LILKMKPI_03239,LILKMKPI_02084,LILKMKPI_03489,LILKMKPI_…
GO:0044444	cytoplasmic part	cellular_component	0.00031152	69	1140	136	3137	46	LILKMKPI_00269,LILKMKPI_00762,LILKMKPI_03035,LILKMKPI_00383,LILKMKPI_03718,LILKMKPI_03034,LILKMKPI_03484,LILKMKPI_00272,LILKMKPI_00382,LILKMKPI_02068,LILKMKPI_03734,LILKMKPI_02811,LILKMKPI_03728,LILKMKPI_00575,LILKMKPI_03725,LILKMKPI_03722,LILKMKPI_00347,LILKMKPI_00767,LILKMKPI_03723,LILKMKPI_00145,LILKMKPI_03714,LILKMKPI_00403,LILKMKPI_03482,LILKMKPI_03721,LILKMKPI_03719,LILKMKPI_03731,LILKMKPI_…	23	LILKMKPI_03048,LILKMKPI_03158,LILKMKPI_01753,LILKMKPI_03630,LILKMKPI_00467,LILKMKPI_04467,LILKMKPI_03931,LILKMKPI_02571,LILKMKPI_01291,LILKMKPI_01364,LILKMKPI_01121,LILKMKPI_02240,LILKMKPI_02751,LILKMKPI_00543,LILKMKPI_02084,LILKMKPI_03489,LILKMKPI_03940,LILKMKPI_02542,LILKMKPI_01612,LILKMKPI_01818,LILKMKPI_02024,LILKMKPI_00423,LILKMKPI_00066
GO:0043228	non-membrane-bounded organelle	cellular_component	0.00037613	68	1140	135	3137	45	LILKMKPI_03733,LILKMKPI_00346,LILKMKPI_03031,LILKMKPI_03676,LILKMKPI_00624,LILKMKPI_03735,LILKMKPI_03715,LILKMKPI_03730,LILKMKPI_03743,LILKMKPI_03344,LILKMKPI_01092,LILKMKPI_02715,LILKMKPI_02692,LILKMKPI_03732,LILKMKPI_03720,LILKMKPI_00615,LILKMKPI_00575,LILKMKPI_03725,LILKMKPI_03728,LILKMKPI_00767,LILKMKPI_03722,LILKMKPI_00347,LILKMKPI_02068,LILKMKPI_00382,LILKMKPI_03734,LILKMKPI_02811,LILKMKPI_…	23	LILKMKPI_03074,LILKMKPI_01979,LILKMKPI_02024,LILKMKPI_02046,LILKMKPI_02084,LILKMKPI_00543,LILKMKPI_03940,LILKMKPI_02479,LILKMKPI_03489,LILKMKPI_01364,LILKMKPI_04006,LILKMKPI_03193,LILKMKPI_03931,LILKMKPI_02240,LILKMKPI_02416,LILKMKPI_00871,LILKMKPI_02041,LILKMKPI_01121,LILKMKPI_00467,LILKMKPI_02423,LILKMKPI_02312,LILKMKPI_01020,LILKMKPI_01753
GO:0043232	intracellular non-membrane-bounded organelle	cellular_component	5.5002e-05	66	1140	124	3137	45	LILKMKPI_00767,LILKMKPI_00347,LILKMKPI_03722,LILKMKPI_03725,LILKMKPI_00575,LILKMKPI_00615,LILKMKPI_03728,LILKMKPI_02811,LILKMKPI_03734,LILKMKPI_02068,LILKMKPI_00382,LILKMKPI_03711,LILKMKPI_03726,LILKMKPI_03731,LILKMKPI_03482,LILKMKPI_03719,LILKMKPI_03721,LILKMKPI_02214,LILKMKPI_00403,LILKMKPI_03714,LILKMKPI_01453,LILKMKPI_00145,LILKMKPI_00956,LILKMKPI_00269,LILKMKPI_00272,LILKMKPI_03484,LILKMKPI_…	21	LILKMKPI_01364,LILKMKPI_03931,LILKMKPI_03193,LILKMKPI_04006,LILKMKPI_02041,LILKMKPI_00871,LILKMKPI_02240,LILKMKPI_01121,LILKMKPI_00467,LILKMKPI_02423,LILKMKPI_02312,LILKMKPI_01753,LILKMKPI_01020,LILKMKPI_03074,LILKMKPI_01979,LILKMKPI_02024,LILKMKPI_02046,LILKMKPI_02084,LILKMKPI_00543,LILKMKPI_03940,LILKMKPI_03489
GO:1990904	ribonucleoprotein complex	cellular_component	1.4671e-06	49	1140	79	3137	39	LILKMKPI_03711,LILKMKPI_03726,LILKMKPI_03731,LILKMKPI_03482,LILKMKPI_03721,LILKMKPI_03719,LILKMKPI_03715,LILKMKPI_00403,LILKMKPI_03714,LILKMKPI_00624,LILKMKPI_03735,LILKMKPI_00145,LILKMKPI_00346,LILKMKPI_00767,LILKMKPI_03722,LILKMKPI_03031,LILKMKPI_00347,LILKMKPI_03725,LILKMKPI_03733,LILKMKPI_00575,LILKMKPI_03728,LILKMKPI_02811,LILKMKPI_00382,LILKMKPI_02068,LILKMKPI_03734,LILKMKPI_03484,LILKMKPI_…	10	LILKMKPI_00871,LILKMKPI_02240,LILKMKPI_02024,LILKMKPI_01121,LILKMKPI_01364,LILKMKPI_03931,LILKMKPI_00467,LILKMKPI_03447,LILKMKPI_03940,LILKMKPI_03489
GO:0005840	ribosome	cellular_component	4.6616e-06	46	1140	75	3137	38	LILKMKPI_00383,LILKMKPI_03720,LILKMKPI_02692,LILKMKPI_03718,LILKMKPI_03034,LILKMKPI_03732,LILKMKPI_03484,LILKMKPI_00272,LILKMKPI_01092,LILKMKPI_03743,LILKMKPI_03344,LILKMKPI_00269,LILKMKPI_03730,LILKMKPI_00145,LILKMKPI_00624,LILKMKPI_03735,LILKMKPI_03715,LILKMKPI_00403,LILKMKPI_03714,LILKMKPI_03721,LILKMKPI_03719,LILKMKPI_03482,LILKMKPI_03731,LILKMKPI_03726,LILKMKPI_03711,LILKMKPI_02068,LILKMKPI_…	8	LILKMKPI_03489,LILKMKPI_03940,LILKMKPI_00467,LILKMKPI_02024,LILKMKPI_01121,LILKMKPI_02240,LILKMKPI_03931,LILKMKPI_01364
GO:0005740	mitochondrial envelope	cellular_component	0.025577	10	1140	16	3137	4	LILKMKPI_01988,LILKMKPI_00963,LILKMKPI_03854,LILKMKPI_03723	6	LILKMKPI_02751,LILKMKPI_00066,LILKMKPI_01291,LILKMKPI_03630,LILKMKPI_00423,LILKMKPI_04467
GO:0031966	mitochondrial membrane	cellular_component	0.046952	9	1140	15	3137	4	LILKMKPI_01988,LILKMKPI_00963,LILKMKPI_03854,LILKMKPI_03723	5	LILKMKPI_02751,LILKMKPI_00066,LILKMKPI_03630,LILKMKPI_00423,LILKMKPI_04467
GO:0005746	mitochondrial respiratory chain	cellular_component	0.0052785	5	1140	5	3137	3	LILKMKPI_03723,LILKMKPI_00963,LILKMKPI_03854	2	LILKMKPI_00423,LILKMKPI_00066
GO:0070469	respiratory chain	cellular_component	0.0052785	5	1140	5	3137	3	LILKMKPI_03854,LILKMKPI_00963,LILKMKPI_03723	2	LILKMKPI_00066,LILKMKPI_00423
GO:0005750	mitochondrial respiratory chain complex III	cellular_component	0.015118	4	1140	4	3137	3	LILKMKPI_03854,LILKMKPI_03723,LILKMKPI_00963	1	LILKMKPI_00066
GO:0045275	respiratory chain complex III	cellular_component	0.015118	4	1140	4	3137	3	LILKMKPI_00963,LILKMKPI_03723,LILKMKPI_03854	1	LILKMKPI_00066
GO:0098803	respiratory chain complex	cellular_component	0.015118	4	1140	4	3137	3	LILKMKPI_03723,LILKMKPI_00963,LILKMKPI_03854	1	LILKMKPI_00066
GO:0030054	cell junction	cellular_component	0.04807	3	1140	3	3137	2	LILKMKPI_02185,LILKMKPI_00403	1	LILKMKPI_01912
GO:0048037	cofactor binding	molecular_function	0.038058	128	1140	308	3137	57	LILKMKPI_01750,LILKMKPI_02328,LILKMKPI_01627,LILKMKPI_01220,LILKMKPI_01822,LILKMKPI_03116,LILKMKPI_02379,LILKMKPI_01845,LILKMKPI_01203,LILKMKPI_02945,LILKMKPI_03201,LILKMKPI_00151,LILKMKPI_02934,LILKMKPI_00314,LILKMKPI_01657,LILKMKPI_01198,LILKMKPI_02098,LILKMKPI_02998,LILKMKPI_01553,LILKMKPI_02615,LILKMKPI_03316,LILKMKPI_02584,LILKMKPI_03407,LILKMKPI_00147,LILKMKPI_01338,LILKMKPI_04072,LILKMKPI_…	71	LILKMKPI_02734,LILKMKPI_01491,LILKMKPI_01961,LILKMKPI_02562,LILKMKPI_00358,LILKMKPI_03006,LILKMKPI_02382,LILKMKPI_03686,LILKMKPI_02573,LILKMKPI_01441,LILKMKPI_02747,LILKMKPI_00055,LILKMKPI_01955,LILKMKPI_02217,LILKMKPI_00341,LILKMKPI_02311,LILKMKPI_01293,LILKMKPI_02750,LILKMKPI_02749,LILKMKPI_04475,LILKMKPI_03982,LILKMKPI_03772,LILKMKPI_00993,LILKMKPI_02572,LILKMKPI_03353,LILKMKPI_01297,LILKMKPI_…
GO:0005198	structural molecule activity	molecular_function	0.00031196	64	1140	125	3137	45	LILKMKPI_03711,LILKMKPI_03731,LILKMKPI_03726,LILKMKPI_00403,LILKMKPI_03714,LILKMKPI_03482,LILKMKPI_03719,LILKMKPI_03999,LILKMKPI_03721,LILKMKPI_00145,LILKMKPI_00347,LILKMKPI_03722,LILKMKPI_00767,LILKMKPI_03728,LILKMKPI_03725,LILKMKPI_00575,LILKMKPI_02811,LILKMKPI_02778,LILKMKPI_03734,LILKMKPI_02068,LILKMKPI_03034,LILKMKPI_03718,LILKMKPI_00272,LILKMKPI_03484,LILKMKPI_00383,LILKMKPI_02066,LILKMKPI_…	19	LILKMKPI_00871,LILKMKPI_02240,LILKMKPI_01121,LILKMKPI_01800,LILKMKPI_01364,LILKMKPI_03347,LILKMKPI_03931,LILKMKPI_03886,LILKMKPI_00467,LILKMKPI_02024,LILKMKPI_00818,LILKMKPI_02478,LILKMKPI_03612,LILKMKPI_03940,LILKMKPI_01599,LILKMKPI_03489,LILKMKPI_01360,LILKMKPI_02084,LILKMKPI_00543
GO:0003735	structural constituent of ribosome	molecular_function	2.6041e-06	47	1140	76	3137	39	LILKMKPI_00383,LILKMKPI_03720,LILKMKPI_02692,LILKMKPI_00272,LILKMKPI_03484,LILKMKPI_03034,LILKMKPI_03732,LILKMKPI_03718,LILKMKPI_03344,LILKMKPI_03743,LILKMKPI_01092,LILKMKPI_00269,LILKMKPI_03730,LILKMKPI_03735,LILKMKPI_00624,LILKMKPI_00145,LILKMKPI_03999,LILKMKPI_03721,LILKMKPI_03482,LILKMKPI_03719,LILKMKPI_00403,LILKMKPI_03714,LILKMKPI_03715,LILKMKPI_03726,LILKMKPI_03731,LILKMKPI_03711,LILKMKPI_…	8	LILKMKPI_03489,LILKMKPI_03940,LILKMKPI_00467,LILKMKPI_02024,LILKMKPI_01121,LILKMKPI_02240,LILKMKPI_03931,LILKMKPI_01364
GO:0051536	iron-sulfur cluster binding	molecular_function	0.040554	29	1140	60	3137	16	LILKMKPI_02962,LILKMKPI_01845,LILKMKPI_01307,LILKMKPI_00470,LILKMKPI_02934,LILKMKPI_00314,LILKMKPI_01404,LILKMKPI_01243,LILKMKPI_01346,LILKMKPI_03811,LILKMKPI_01220,LILKMKPI_03316,LILKMKPI_01317,LILKMKPI_00557,LILKMKPI_01704,LILKMKPI_02945	13	LILKMKPI_01293,LILKMKPI_04082,LILKMKPI_02750,LILKMKPI_03519,LILKMKPI_00359,LILKMKPI_03772,LILKMKPI_00358,LILKMKPI_02468,LILKMKPI_02747,LILKMKPI_00055,LILKMKPI_03774,LILKMKPI_02746,LILKMKPI_03193
GO:0051540	metal cluster binding	molecular_function	0.040554	29	1140	60	3137	16	LILKMKPI_01307,LILKMKPI_01845,LILKMKPI_02962,LILKMKPI_00470,LILKMKPI_02934,LILKMKPI_00314,LILKMKPI_01243,LILKMKPI_01404,LILKMKPI_03811,LILKMKPI_01346,LILKMKPI_01317,LILKMKPI_01220,LILKMKPI_03316,LILKMKPI_00557,LILKMKPI_01704,LILKMKPI_02945	13	LILKMKPI_03519,LILKMKPI_02750,LILKMKPI_04082,LILKMKPI_01293,LILKMKPI_03772,LILKMKPI_00359,LILKMKPI_00358,LILKMKPI_02468,LILKMKPI_00055,LILKMKPI_02747,LILKMKPI_03774,LILKMKPI_02746,LILKMKPI_03193
GO:0050661	NADP binding	molecular_function	0.031873	13	1140	22	3137	5	LILKMKPI_02328,LILKMKPI_02285,LILKMKPI_00148,LILKMKPI_02784,LILKMKPI_01201	8	LILKMKPI_00606,LILKMKPI_01868,LILKMKPI_02562,LILKMKPI_03816,LILKMKPI_02382,LILKMKPI_00463,LILKMKPI_00356,LILKMKPI_03835
GO:0015267	channel activity	molecular_function	0.022213	12	1140	20	3137	0		12	LILKMKPI_02775,LILKMKPI_01261,LILKMKPI_02463,LILKMKPI_01381,LILKMKPI_02774,LILKMKPI_01492,LILKMKPI_03707,LILKMKPI_02742,LILKMKPI_02228,LILKMKPI_03144,LILKMKPI_02711,LILKMKPI_01435
GO:0022803	passive transmembrane transporter activity	molecular_function	0.022213	12	1140	20	3137	0		12	LILKMKPI_02463,LILKMKPI_02775,LILKMKPI_01261,LILKMKPI_02774,LILKMKPI_01381,LILKMKPI_02742,LILKMKPI_03707,LILKMKPI_01492,LILKMKPI_01435,LILKMKPI_02711,LILKMKPI_03144,LILKMKPI_02228
GO:0016651	oxidoreductase activity, acting on NAD(P)H	molecular_function	0.021819	11	1140	17	3137	5	LILKMKPI_03688,LILKMKPI_01657,LILKMKPI_02662,LILKMKPI_01844,LILKMKPI_00721	6	LILKMKPI_02743,LILKMKPI_02751,LILKMKPI_01933,LILKMKPI_02742,LILKMKPI_01868,LILKMKPI_02749
GO:0005216	ion channel activity	molecular_function	0.026872	9	1140	14	3137	0		9	LILKMKPI_01435,LILKMKPI_03144,LILKMKPI_02742,LILKMKPI_03707,LILKMKPI_02774,LILKMKPI_01381,LILKMKPI_02463,LILKMKPI_01261,LILKMKPI_02775
GO:0022838	substrate-specific channel activity	molecular_function	0.026872	9	1140	14	3137	0		9	LILKMKPI_02774,LILKMKPI_01381,LILKMKPI_02463,LILKMKPI_02775,LILKMKPI_01261,LILKMKPI_01435,LILKMKPI_03144,LILKMKPI_02742,LILKMKPI_03707
GO:0005231	excitatory extracellular ligand-gated ion channel activity	molecular_function	0.0089833	6	1140	7	3137	0		6	LILKMKPI_02775,LILKMKPI_02463,LILKMKPI_01381,LILKMKPI_03144,LILKMKPI_01435,LILKMKPI_02774
GO:0005234	extracellularly glutamate-gated ion channel activity	molecular_function	0.0089833	6	1140	7	3137	0		6	LILKMKPI_01435,LILKMKPI_02774,LILKMKPI_01381,LILKMKPI_03144,LILKMKPI_02775,LILKMKPI_02463
GO:0004970	ionotropic glutamate receptor activity	molecular_function	0.026008	6	1140	8	3137	0		6	LILKMKPI_02775,LILKMKPI_02463,LILKMKPI_01435,LILKMKPI_02774,LILKMKPI_01381,LILKMKPI_03144
GO:0005230	extracellular ligand-gated ion channel activity	molecular_function	0.026008	6	1140	8	3137	0		6	LILKMKPI_03144,LILKMKPI_01381,LILKMKPI_02774,LILKMKPI_01435,LILKMKPI_02775,LILKMKPI_02463
GO:0008066	glutamate receptor activity	molecular_function	0.026008	6	1140	8	3137	0		6	LILKMKPI_02775,LILKMKPI_02463,LILKMKPI_01381,LILKMKPI_03144,LILKMKPI_02774,LILKMKPI_01435
GO:0015276	ligand-gated ion channel activity	molecular_function	0.026008	6	1140	8	3137	0		6	LILKMKPI_01435,LILKMKPI_02774,LILKMKPI_03144,LILKMKPI_01381,LILKMKPI_02463,LILKMKPI_02775
GO:0022824	transmitter-gated ion channel activity	molecular_function	0.026008	6	1140	8	3137	0		6	LILKMKPI_02775,LILKMKPI_02463,LILKMKPI_03144,LILKMKPI_01381,LILKMKPI_01435,LILKMKPI_02774
GO:0022834	ligand-gated channel activity	molecular_function	0.026008	6	1140	8	3137	0		6	LILKMKPI_02775,LILKMKPI_02463,LILKMKPI_01381,LILKMKPI_03144,LILKMKPI_01435,LILKMKPI_02774
GO:0022835	transmitter-gated channel activity	molecular_function	0.026008	6	1140	8	3137	0		6	LILKMKPI_01435,LILKMKPI_02774,LILKMKPI_03144,LILKMKPI_01381,LILKMKPI_02775,LILKMKPI_02463
GO:0030594	neurotransmitter receptor activity	molecular_function	0.026008	6	1140	8	3137	0		6	LILKMKPI_02775,LILKMKPI_02463,LILKMKPI_01435,LILKMKPI_02774,LILKMKPI_01381,LILKMKPI_03144
GO:0016743	carboxyl- or carbamoyltransferase activity	molecular_function	0.044428	3	1140	3	3137	0		3	LILKMKPI_00477,LILKMKPI_00474,LILKMKPI_00481

## Sheet: Enriched KEGG pathways
Table S2 Transcriptional analyses of desiccated C. sakazakii
Term	ID	Input number	Background number	P-Value	KEGG_ID/KO	Entrez_ID	Hyperlink
Citrate cycle (TCA cycle)	esa00020	21	24	0.00818254	esa:ESA_03222|esa:ESA_03223|esa:ESA_00163|esa:ESA_03816|esa:ESA_02620|esa:ESA_02619|esa:ESA_02622|esa:ESA_02623|esa:ESA_02627|esa:ESA_04336|esa:ESA_01967|esa:ESA_00162|esa:ESA_00164|esa:ESA_02621|esa:ESA_03622|esa:ESA_00165|esa:ESA_02209|esa:ESA_01574|esa:ESA_02625|esa:ESA_02626|esa:ESA_02624|	5552050|5551970|5549146|5548634|5550758|5550768|5550703|5550739|5552168|5548275|5550137|5549181|5549089|5550741|5550528|5549173|5551990|5550086|5551897|5550711|5550746|	http://www.genome.jp/kegg-bin/show_pathway?esa00020/esa:ESA_04336%09red/esa:ESA_00162%09red/esa:ESA_03816%09red/esa:ESA_02619%09red/esa:ESA_00163%09red/esa:ESA_02209%09red/esa:ESA_00165%09red/esa:ESA_00164%09red/esa:ESA_02621%09red/esa:ESA_01967%09red/esa:ESA_02624%09red/esa:ESA_03622%09red/esa:ESA_02625%09red/esa:ESA_03223%09red/esa:ESA_03222%09red/esa:ESA_02626%09red/esa:ESA_02627%09red/esa:ESA…
Oxidative phosphorylation	esa00190	30	43	0.0160156	esa:ESA_00163|esa:ESA_00162|esa:ESA_00934|esa:ESA_02624|esa:ESA_02623|esa:ESA_02626|esa:ESA_02625|esa:ESA_02947|esa:ESA_00942|esa:ESA_00943|esa:ESA_00940|esa:ESA_00941|esa:ESA_00938|esa:ESA_00939|esa:ESA_00936|esa:ESA_00937|esa:ESA_00164|esa:ESA_00165|esa:ESA_04006|esa:ESA_02235|esa:ESA_00935|esa:ESA_02614|esa:ESA_02613|esa:ESA_04011|esa:ESA_00231|esa:ESA_02870|esa:ESA_00933|esa:ESA_00932|esa:ESA…	5549146|5549181|5548360|5550746|5550739|5550711|5551897|5548484|5549817|5549440|5552132|5549769|5552247|5552135|5551714|5552350|5549089|5549173|5549101|5551872|5548137|5550761|5550744|5549087|5549951|5548739|5548395|5548454|5550719|5549710|	http://www.genome.jp/kegg-bin/show_pathway?esa00190/esa:ESA_00760%09red/esa:ESA_02626%09red/esa:ESA_00231%09red/esa:ESA_02614%09red/esa:ESA_02613%09red/esa:ESA_00944%09red/esa:ESA_00943%09red/esa:ESA_00942%09red/esa:ESA_00941%09red/esa:ESA_00940%09red/esa:ESA_04011%09red/esa:ESA_02235%09red/esa:ESA_02870%09red/esa:ESA_00163%09red/esa:ESA_00162%09red/esa:ESA_00165%09red/esa:ESA_00164%09red/esa:ESA…
Carbon metabolism	esa01200	56	103	0.0450008	esa:ESA_00790|esa:ESA_00163|esa:ESA_00162|esa:ESA_00882|esa:ESA_03476|esa:ESA_02577|esa:ESA_03364|esa:ESA_03714|esa:ESA_00788|esa:ESA_00789|esa:ESA_02624|esa:ESA_03222|esa:ESA_03223|esa:ESA_02626|esa:ESA_02625|esa:ESA_03862|esa:ESA_03863|esa:ESA_02622|esa:ESA_02621|esa:ESA_03645|esa:ESA_03864|esa:ESA_02983|esa:ESA_00826|esa:ESA_00852|esa:ESA_00426|esa:ESA_00164|esa:ESA_00165|esa:ESA_01574|esa:ESA…	5550518|5549146|5549181|5550271|5551190|5549467|5551058|5552271|5550537|5550527|5550746|5552050|5551970|5550711|5551897|5548783|5548526|5550703|5550741|5550393|5548682|5548716|5550363|5550626|5549571|5549089|5549173|5550086|5550277|5548939|5551990|5548761|5550739|5548208|5548275|5550137|5550290|5550528|5549455|5550651|5550758|5549343|5552176|5549178|5550768|5551215|5548634|5548356|5551154|5548966…	http://www.genome.jp/kegg-bin/show_pathway?esa01200/esa:ESA_03811%09red/esa:ESA_01389%09red/esa:ESA_03816%09red/esa:ESA_01189%09red/esa:ESA_00507%09red/esa:ESA_00054%09red/esa:ESA_02624%09red/esa:ESA_03622%09red/esa:ESA_00053%09red/esa:ESA_00882%09red/esa:ESA_01574%09red/esa:ESA_03645%09red/esa:ESA_02102%09red/esa:ESA_03476%09red/esa:ESA_01387%09red/esa:ESA_02590%09red/esa:ESA_02209%09red/esa:ESA…
Ribosome	esa03010	41	72	0.0505336	esa:ESA_00012|esa:ESA_00011|esa:ESA_02814|esa:ESA_00021|esa:ESA_00020|esa:ESA_00019|esa:ESA_00018|esa:ESA_00203|esa:ESA_00015|esa:ESA_00014|esa:ESA_00202|esa:ESA_03692|esa:ESA_03693|esa:ESA_03695|esa:ESA_03314|esa:ESA_00005|esa:ESA_00024|esa:ESA_03824|esa:ESA_04400|esa:ESA_03173|esa:ESA_00200|esa:ESA_00001|esa:ESA_00002|esa:ESA_00004|esa:ESA_00023|esa:ESA_00007|esa:ESA_00008|esa:ESA_00010|esa:ESA…	5548765|5548840|5549968|5548964|5548844|5548877|5548992|5549188|5548894|5552384|5552252|5550825|5550332|5550303|5551293|5552259|5548974|5548361|5548798|5549500|5549293|5549280|5548631|5548703|5548697|5548832|5548732|5548826|5548896|5548890|5552172|5552343|5548827|5550578|5550615|5549970|5551792|5551421|5551389|9711815|5550738|	http://www.genome.jp/kegg-bin/show_pathway?esa03010/esa:ESA_00019%09red/esa:ESA_00018%09red/esa:ESA_00032%09red/esa:ESA_00030%09red/esa:ESA_00011%09red/esa:ESA_00010%09red/esa:ESA_02814%09red/esa:ESA_00015%09red/esa:ESA_00014%09red/esa:ESA_00646%09red/esa:ESA_00649%09red/esa:ESA_03578%09red/esa:ESA_00002%09red/esa:ESA_04400%09red/esa:ESA_00012%09red/esa:ESA_04500%09red/esa:ESA_00005%09red/esa:ESA…
Pyruvate metabolism	esa00620	26	43	0.0695606	esa:ESA_00163|esa:ESA_00162|esa:ESA_01681|esa:ESA_02466|esa:ESA_02441|esa:ESA_03222|esa:ESA_03223|esa:ESA_02381|esa:ESA_03645|esa:ESA_03841|esa:ESA_00164|esa:ESA_00165|esa:ESA_04336|esa:ESA_00790|esa:ESA_01106|esa:ESA_01967|esa:ESA_02102|esa:ESA_03622|esa:ESA_01387|esa:ESA_03816|esa:ESA_03811|esa:ESA_00053|esa:ESA_02011|esa:ESA_01539|esa:ESA_00671|esa:ESA_03127|	5549146|5549181|5551700|5550940|5549764|5552050|5551970|5551059|5550393|5548774|5549089|5549173|5548275|5550518|5548499|5550137|5550290|5550528|5549178|5548634|5548356|5551154|5551852|5549503|5551298|5552255|	http://www.genome.jp/kegg-bin/show_pathway?esa00620/esa:ESA_03811%09red/esa:ESA_02011%09red/esa:ESA_03816%09red/esa:ESA_02381%09red/esa:ESA_03622%09red/esa:ESA_00053%09red/esa:ESA_03127%09red/esa:ESA_01106%09red/esa:ESA_03645%09red/esa:ESA_01387%09red/esa:ESA_01539%09red/esa:ESA_01967%09red/esa:ESA_03223%09red/esa:ESA_03222%09red/esa:ESA_04336%09red/esa:ESA_00163%09red/esa:ESA_00162%09red/esa:ESA…
Microbial metabolism in diverse environments	esa01120	85	175	0.0915995	esa:ESA_00790|esa:ESA_00163|esa:ESA_02209|esa:ESA_03885|esa:ESA_01522|esa:ESA_00882|esa:ESA_00881|esa:ESA_01681|esa:ESA_01682|esa:ESA_pESA3p05548|esa:ESA_02577|esa:ESA_02467|esa:ESA_00162|esa:ESA_04048|esa:ESA_pESA3p05549|esa:ESA_03364|esa:ESA_02620|esa:ESA_03714|esa:ESA_00788|esa:ESA_00789|esa:ESA_02624|esa:ESA_03222|esa:ESA_03223|esa:ESA_01523|esa:ESA_02625|esa:ESA_03335|esa:ESA_03863|esa:ESA_0…	5550518|5549146|5551990|5548677|5549945|5550271|5550274|5551700|5551699|5552653|5549467|5550935|5549181|5551159|5552654|5551058|5550758|5552271|5550537|5550527|5550746|5552050|5551970|5549984|5551897|5551211|5548526|5550703|5550741|5550393|5549470|5548682|5548716|5552615|5550363|5550626|5549089|5549173|5551791|5551816|5548208|5548165|5548195|5548939|5548980|5550768|5548761|5549974|5548122|5551190…	http://www.genome.jp/kegg-bin/show_pathway?esa01120/esa:ESA_03811%09red/esa:ESA_03364%09red/esa:ESA_01389%09red/esa:ESA_00053%09red/esa:ESA_03816%09red/esa:ESA_03821%09red/esa:ESA_01189%09red/esa:ESA_02626%09red/esa:ESA_00054%09red/esa:ESA_02381%09red/esa:ESA_00162%09red/esa:ESA_02624%09red/esa:ESA_03622%09red/esa:ESA_02385%09red/esa:ESA_02010%09red/esa:ESA_00882%09red/esa:ESA_00881%09red/esa:ESA…
beta-Lactam resistance	esa00312	13	19	0.102599	esa:ESA_02808|esa:ESA_02692|esa:ESA_02378|esa:ESA_01541|esa:ESA_00373|esa:ESA_01545|esa:ESA_01544|esa:ESA_01543|esa:ESA_01542|esa:ESA_01658|esa:ESA_04345|esa:ESA_00974|esa:ESA_02807|	5550254|5550437|5551057|5549839|5549699|5549870|5549806|5549861|5550024|5551775|5548316|5548456|5552381|	http://www.genome.jp/kegg-bin/show_pathway?esa00312/esa:ESA_02808%09red/esa:ESA_04345%09red/esa:ESA_00373%09red/esa:ESA_02378%09red/esa:ESA_02807%09red/esa:ESA_01541%09red/esa:ESA_01542%09red/esa:ESA_01543%09red/esa:ESA_01544%09red/esa:ESA_01545%09red/esa:ESA_00974%09red/esa:ESA_01658%09red/esa:ESA_02692%09red
Butanoate metabolism	esa00650	17	27	0.103529	esa:ESA_02624|esa:ESA_02623|esa:ESA_03260|esa:ESA_03261|esa:ESA_00882|esa:ESA_01539|esa:ESA_00162|esa:ESA_00163|esa:ESA_00164|esa:ESA_00165|esa:ESA_04278|esa:ESA_00862|esa:ESA_03714|esa:ESA_02625|esa:ESA_02626|esa:ESA_02441|esa:ESA_01866|	5550746|5550739|5551753|5551651|5550271|5549503|5549181|5549146|5549089|5549173|5552383|5550695|5552271|5551897|5550711|5549764|5549920|	http://www.genome.jp/kegg-bin/show_pathway?esa00650/esa:ESA_02441%09red/esa:ESA_00163%09red/esa:ESA_00162%09red/esa:ESA_00165%09red/esa:ESA_00164%09red/esa:ESA_03261%09red/esa:ESA_03260%09red/esa:ESA_02624%09red/esa:ESA_03714%09red/esa:ESA_01866%09red/esa:ESA_00862%09red/esa:ESA_04278%09red/esa:ESA_00882%09red/esa:ESA_02625%09red/esa:ESA_02626%09red/esa:ESA_01539%09red/esa:ESA_02623%09red
Alanine, aspartate and glutamate metabolism	esa00250	16	26	0.124686	esa:ESA_00904|esa:ESA_04018|esa:ESA_00151|esa:ESA_02215|esa:ESA_03482|esa:ESA_00684|esa:ESA_03607|esa:ESA_03481|esa:ESA_03298|esa:ESA_04048|esa:ESA_02665|esa:ESA_02357|esa:ESA_02414|esa:ESA_04278|esa:ESA_03807|esa:ESA_03806|	5552213|5548920|5551556|5551955|5551226|5551204|5550630|5551254|5551368|5551159|5550542|5551142|5550900|5552383|5548188|5548543|	http://www.genome.jp/kegg-bin/show_pathway?esa00250/esa:ESA_03807%09red/esa:ESA_00151%09red/esa:ESA_04048%09red/esa:ESA_02215%09red/esa:ESA_03806%09red/esa:ESA_04278%09red/esa:ESA_02357%09red/esa:ESA_03298%09red/esa:ESA_00684%09red/esa:ESA_03482%09red/esa:ESA_03481%09red/esa:ESA_02665%09red/esa:ESA_02414%09red/esa:ESA_04018%09red/esa:ESA_03607%09red/esa:ESA_00904%09red
Nitrogen metabolism	esa00910	12	19	0.154434	esa:ESA_03476|esa:ESA_01523|esa:ESA_02959|esa:ESA_03607|esa:ESA_01520|esa:ESA_01519|esa:ESA_01522|esa:ESA_01521|esa:ESA_04048|esa:ESA_02464|esa:ESA_04367|esa:ESA_04368|	5551190|5549984|5548657|5550630|5551367|5550025|5549945|5549966|5551159|5550930|5548165|5548195|	http://www.genome.jp/kegg-bin/show_pathway?esa00910/esa:ESA_04048%09red/esa:ESA_01522%09red/esa:ESA_01523%09red/esa:ESA_01520%09red/esa:ESA_01521%09red/esa:ESA_01519%09red/esa:ESA_02959%09red/esa:ESA_02464%09red/esa:ESA_04368%09red/esa:ESA_04367%09red/esa:ESA_03476%09red/esa:ESA_03607%09red
Lysine degradation	esa00310	7	11	0.241876	esa:ESA_00882|esa:ESA_02622|esa:ESA_02621|esa:ESA_pESA3p05547|esa:ESA_pESA3p05548|esa:ESA_pESA3p05549|esa:ESA_03714|	5550271|5550703|5550741|5552615|5552653|5552654|5552271|	http://www.genome.jp/kegg-bin/show_pathway?esa00310/esa:ESA_pESA3p05547%09red/esa:ESA_03714%09red/esa:ESA_02622%09red/esa:ESA_00882%09red/esa:ESA_02621%09red/esa:ESA_pESA3p05548%09red/esa:ESA_pESA3p05549%09red
Streptomycin biosynthesis	esa00521	4	5	0.244247	esa:ESA_00718|esa:ESA_01179|esa:ESA_00852|esa:ESA_01178|	5549650|5548669|5550626|5548752|	http://www.genome.jp/kegg-bin/show_pathway?esa00521/esa:ESA_01179%09red/esa:ESA_01178%09red/esa:ESA_00718%09red/esa:ESA_00852%09red
Arginine and proline metabolism	esa00330	21	42	0.253945	esa:ESA_00314|esa:ESA_03475|esa:ESA_03109|esa:ESA_01897|esa:ESA_03810|esa:ESA_03476|esa:ESA_03472|esa:ESA_03110|esa:ESA_03808|esa:ESA_02919|esa:ESA_03477|esa:ESA_02646|esa:ESA_00491|esa:ESA_03212|esa:ESA_04048|esa:ESA_03492|esa:ESA_02357|esa:ESA_02414|esa:ESA_03806|esa:ESA_03807|esa:ESA_01928|	5552238|5551210|5548226|5549001|5548152|5551190|5549225|5552476|5548632|5548571|5551219|5550629|5552091|5552120|5551159|5551297|5551142|5550900|5548543|5548188|5549238|	http://www.genome.jp/kegg-bin/show_pathway?esa00330/esa:ESA_03472%09red/esa:ESA_03109%09red/esa:ESA_04048%09red/esa:ESA_02919%09red/esa:ESA_01897%09red/esa:ESA_03477%09red/esa:ESA_00314%09red/esa:ESA_03475%09red/esa:ESA_03212%09red/esa:ESA_03807%09red/esa:ESA_01928%09red/esa:ESA_03492%09red/esa:ESA_03808%09red/esa:ESA_00491%09red/esa:ESA_03810%09red/esa:ESA_03110%09red/esa:ESA_03476%09red/esa:ESA…
Glutathione metabolism	esa00480	10	18	0.2698	esa:ESA_00314|esa:ESA_03464|esa:ESA_01994|esa:ESA_01189|esa:ESA_02209|esa:ESA_04296|esa:ESA_00116|esa:ESA_02646|esa:ESA_03212|esa:ESA_01389|	5552238|5551014|5552458|5548761|5551990|5552221|5549149|5550629|5552120|5549343|	http://www.genome.jp/kegg-bin/show_pathway?esa00480/esa:ESA_01389%09red/esa:ESA_03464%09red/esa:ESA_00314%09red/esa:ESA_01189%09red/esa:ESA_00116%09red/esa:ESA_02209%09red/esa:ESA_02646%09red/esa:ESA_04296%09red/esa:ESA_01994%09red/esa:ESA_03212%09red
Glyoxylate and dicarboxylate metabolism	esa00630	12	23	0.293271	esa:ESA_03862|esa:ESA_03863|esa:ESA_00053|esa:ESA_00054|esa:ESA_02627|esa:ESA_03864|esa:ESA_03861|esa:ESA_03622|esa:ESA_04048|esa:ESA_01574|esa:ESA_02945|esa:ESA_00425|	5548783|5548526|5551154|5548966|5552168|5548682|5548520|5550528|5551159|5550086|5548594|5550260|	http://www.genome.jp/kegg-bin/show_pathway?esa00630/esa:ESA_00425%09red/esa:ESA_04048%09red/esa:ESA_00053%09red/esa:ESA_00054%09red/esa:ESA_03864%09red/esa:ESA_03861%09red/esa:ESA_03622%09red/esa:ESA_03863%09red/esa:ESA_03862%09red/esa:ESA_02945%09red/esa:ESA_02627%09red/esa:ESA_01574%09red
RNA degradation	esa03018	8	15	0.335232	esa:ESA_03326|esa:ESA_03738|esa:ESA_00760|esa:ESA_02261|esa:ESA_02548|esa:ESA_03557|esa:ESA_03554|esa:ESA_03775|	5551246|5548506|5550719|5551694|5551825|5549678|5549509|5548379|	http://www.genome.jp/kegg-bin/show_pathway?esa03018/esa:ESA_03775%09red/esa:ESA_02261%09red/esa:ESA_03554%09red/esa:ESA_03557%09red/esa:ESA_03738%09red/esa:ESA_00760%09red/esa:ESA_03326%09red/esa:ESA_02548%09red
Cysteine and methionine metabolism	esa00270	18	38	0.338643	esa:ESA_00812|esa:ESA_00067|esa:ESA_03212|esa:ESA_03335|esa:ESA_03821|esa:ESA_03822|esa:ESA_00734|esa:ESA_00400|esa:ESA_00826|esa:ESA_00052|esa:ESA_01237|esa:ESA_01364|esa:ESA_03622|esa:ESA_00581|esa:ESA_04308|esa:ESA_02414|esa:ESA_00811|esa:ESA_00507|	5550391|5548980|5552120|5551211|5548122|5548183|5550777|5549819|5550363|5551274|5548848|5549197|5550528|5551667|5549974|5550900|5550443|5552176|	http://www.genome.jp/kegg-bin/show_pathway?esa00270/esa:ESA_00811%09red/esa:ESA_00067%09red/esa:ESA_04308%09red/esa:ESA_01364%09red/esa:ESA_01237%09red/esa:ESA_00581%09red/esa:ESA_03821%09red/esa:ESA_03822%09red/esa:ESA_00400%09red/esa:ESA_00507%09red/esa:ESA_03335%09red/esa:ESA_00812%09red/esa:ESA_03622%09red/esa:ESA_00052%09red/esa:ESA_00734%09red/esa:ESA_00826%09red/esa:ESA_03212%09red/esa:ESA…
Nicotinate and nicotinamide metabolism	esa00760	10	20	0.357054	esa:ESA_00547|esa:ESA_00641|esa:ESA_04384|esa:ESA_02596|esa:ESA_00684|esa:ESA_02784|esa:ESA_01957|esa:ESA_02148|esa:ESA_03677|esa:ESA_01956|	5551718|5551419|5548394|5552363|5551204|5552295|5549946|5550101|5550612|5549959|	http://www.genome.jp/kegg-bin/show_pathway?esa00760/esa:ESA_02596%09red/esa:ESA_00547%09red/esa:ESA_04384%09red/esa:ESA_02148%09red/esa:ESA_00684%09red/esa:ESA_00641%09red/esa:ESA_02784%09red/esa:ESA_01957%09red/esa:ESA_01956%09red/esa:ESA_03677%09red
Bacterial chemotaxis	esa02030	16	34	0.360643	esa:ESA_01341|esa:ESA_00081|esa:ESA_01350|esa:ESA_03402|esa:ESA_01348|esa:ESA_00560|esa:ESA_01353|esa:ESA_03489|esa:ESA_03488|esa:ESA_01088|esa:ESA_02998|esa:ESA_01710|esa:ESA_04193|esa:ESA_04025|esa:ESA_01342|esa:ESA_01351|	5551518|5551551|5549143|5550895|5549189|5551728|5549205|5551302|5551404|5548236|5548778|5551525|5550513|5550965|5551581|5549171|	http://www.genome.jp/kegg-bin/show_pathway?esa02030/esa:ESA_01088%09red/esa:ESA_00081%09red/esa:ESA_00560%09red/esa:ESA_03402%09red/esa:ESA_01710%09red/esa:ESA_04025%09red/esa:ESA_02998%09red/esa:ESA_04193%09red/esa:ESA_01351%09red/esa:ESA_01350%09red/esa:ESA_01353%09red/esa:ESA_01341%09red/esa:ESA_01342%09red/esa:ESA_03489%09red/esa:ESA_03488%09red/esa:ESA_01348%09red
2-Oxocarboxylic acid metabolism	esa01210	12	25	0.373042	esa:ESA_02209|esa:ESA_00067|esa:ESA_03260|esa:ESA_03261|esa:ESA_04308|esa:ESA_03810|esa:ESA_03267|esa:ESA_02627|esa:ESA_03808|esa:ESA_01574|esa:ESA_02414|esa:ESA_00491|	5551990|5548980|5551753|5551651|5549974|5548152|5551642|5552168|5548632|5550086|5550900|5552091|	http://www.genome.jp/kegg-bin/show_pathway?esa01210/esa:ESA_03810%09red/esa:ESA_02209%09red/esa:ESA_04308%09red/esa:ESA_03267%09red/esa:ESA_03260%09red/esa:ESA_00067%09red/esa:ESA_03261%09red/esa:ESA_03808%09red/esa:ESA_00491%09red/esa:ESA_02627%09red/esa:ESA_01574%09red/esa:ESA_02414%09red
beta-Alanine metabolism	esa00410	5	9	0.378118	esa:ESA_03714|esa:ESA_03212|esa:ESA_04278|esa:ESA_00882|esa:ESA_01928|	5552271|5552120|5552383|5550271|5549238|	http://www.genome.jp/kegg-bin/show_pathway?esa00410/esa:ESA_00882%09red/esa:ESA_04278%09red/esa:ESA_01928%09red/esa:ESA_03714%09red/esa:ESA_03212%09red
Lysine biosynthesis	esa00300	7	14	0.403048	esa:ESA_00067|esa:ESA_03335|esa:ESA_03252|esa:ESA_03177|esa:ESA_03253|esa:ESA_03821|esa:ESA_04308|	5548980|5551211|5551801|5549470|5551758|5548122|5549974|	http://www.genome.jp/kegg-bin/show_pathway?esa00300/esa:ESA_03252%09red/esa:ESA_04308%09red/esa:ESA_03821%09red/esa:ESA_00067%09red/esa:ESA_03177%09red/esa:ESA_03253%09red/esa:ESA_03335%09red
Protein export	esa03060	9	19	0.418741	esa:ESA_00691|esa:ESA_00645|esa:ESA_03241|esa:ESA_00027|esa:ESA_03698|esa:ESA_02893|esa:ESA_02894|esa:ESA_03566|esa:ESA_03978|	5551170|5551430|5551876|5548899|5550333|5548359|5548343|5550837|5548898|	http://www.genome.jp/kegg-bin/show_pathway?esa03060/esa:ESA_03566%09red/esa:ESA_03978%09red/esa:ESA_00027%09red/esa:ESA_03241%09red/esa:ESA_02894%09red/esa:ESA_02893%09red/esa:ESA_00645%09red/esa:ESA_00691%09red/esa:ESA_03698%09red
Thiamine metabolism	esa00730	6	12	0.422314	esa:ESA_02879|esa:ESA_02885|esa:ESA_00721|esa:ESA_02882|esa:ESA_01133|esa:ESA_01134|	5548265|5551767|5549592|5548227|5551492|5548429|	http://www.genome.jp/kegg-bin/show_pathway?esa00730/esa:ESA_01133%09red/esa:ESA_01134%09red/esa:ESA_00721%09red/esa:ESA_02882%09red/esa:ESA_02879%09red/esa:ESA_02885%09red
Fatty acid degradation	esa00071	6	12	0.422314	esa:ESA_00882|esa:ESA_00881|esa:ESA_01682|esa:ESA_01539|esa:ESA_03121|esa:ESA_03714|	5550271|5550274|5551699|5549503|5549416|5552271|	http://www.genome.jp/kegg-bin/show_pathway?esa00071/esa:ESA_01539%09red/esa:ESA_01682%09red/esa:ESA_03714%09red/esa:ESA_00882%09red/esa:ESA_00881%09red/esa:ESA_03121%09red
Homologous recombination	esa03440	12	27	0.45492	esa:ESA_02803|esa:ESA_03825|esa:ESA_02245|esa:ESA_00108|esa:ESA_00694|esa:ESA_03380|esa:ESA_00201|esa:ESA_00567|esa:ESA_03975|esa:ESA_03974|esa:ESA_01398|esa:ESA_03396|	5552349|5548299|5551839|5549031|5551173|5550998|5549362|5551725|5549047|5548909|5549316|5552315|	http://www.genome.jp/kegg-bin/show_pathway?esa03440/esa:ESA_03974%09red/esa:ESA_00567%09red/esa:ESA_02803%09red/esa:ESA_03396%09red/esa:ESA_01398%09red/esa:ESA_03975%09red/esa:ESA_02245%09red/esa:ESA_03825%09red/esa:ESA_00201%09red/esa:ESA_00108%09red/esa:ESA_03380%09red/esa:ESA_00694%09red
Biosynthesis of amino acids	esa01230	51	122	0.455037	esa:ESA_00400|esa:ESA_02914|esa:ESA_00067|esa:ESA_02919|esa:ESA_02467|esa:ESA_04048|esa:ESA_03364|esa:ESA_03807|esa:ESA_03806|esa:ESA_00789|esa:ESA_00788|esa:ESA_02209|esa:ESA_03267|esa:ESA_00653|esa:ESA_03335|esa:ESA_03334|esa:ESA_03822|esa:ESA_03472|esa:ESA_02983|esa:ESA_00826|esa:ESA_00052|esa:ESA_01574|esa:ESA_00581|esa:ESA_01191|esa:ESA_01364|esa:ESA_04308|esa:ESA_03821|esa:ESA_04383|esa:ESA…	5549819|5548505|5548980|5548571|5550935|5551159|5551058|5548188|5548543|5550527|5550537|5551990|5551642|5551395|5551211|5551232|5548183|5549225|5548716|5550363|5551274|5550086|5551667|5548666|5549197|5549974|5548122|5548208|5552476|5548226|5551219|5552091|5549455|5548920|5552176|5549178|5548152|5551215|5551753|5551651|5549001|5550405|5552168|5548677|5548632|5550630|5552360|5549470|5548621|5550900…	http://www.genome.jp/kegg-bin/show_pathway?esa01230/esa:ESA_03810%09red/esa:ESA_03807%09red/esa:ESA_01897%09red/esa:ESA_01364%09red/esa:ESA_00507%09red/esa:ESA_00491%09red/esa:ESA_00826%09red/esa:ESA_02914%09red/esa:ESA_00052%09red/esa:ESA_03109%09red/esa:ESA_01574%09red/esa:ESA_03607%09red/esa:ESA_04308%09red/esa:ESA_03472%09red/esa:ESA_02627%09red/esa:ESA_01387%09red/esa:ESA_03643%09red/esa:ESA…
ABC transporters	esa02010	79	191	0.462683	esa:ESA_01089|esa:ESA_01090|esa:ESA_00081|esa:ESA_02682|esa:ESA_01110|esa:ESA_01108|esa:ESA_02680|esa:ESA_01088|esa:ESA_04161|esa:ESA_00082|esa:ESA_02505|esa:ESA_02970|esa:ESA_04281|esa:ESA_03588|esa:ESA_04025|esa:ESA_00453|esa:ESA_02504|esa:ESA_03584|esa:ESA_02506|esa:ESA_02507|esa:ESA_02224|esa:ESA_00822|esa:ESA_01058|esa:ESA_00454|esa:ESA_02378|esa:ESA_02483|esa:ESA_00868|esa:ESA_03421|esa:ESA…	5548334|5548143|5551551|5550467|5552366|5548579|5550482|5548236|5550735|5551171|5551402|5548718|5552302|5549553|5550965|5549611|5551356|5552208|5551407|5551446|5550219|5550354|5548455|5549665|5551057|5551106|5550346|5549490|5551705|5550381|5550371|5549088|5552396|5549588|5551310|5549528|5551613|5549073|5550365|5550433|5552218|5548778|5549639|5549473|5550372|5550481|5549390|5549308|5552303|5551775…	http://www.genome.jp/kegg-bin/show_pathway?esa02010/esa:ESA_01089%09red/esa:ESA_01088%09red/esa:ESA_02713%09red/esa:ESA_01302%09red/esa:ESA_04128%09red/esa:ESA_04161%09red/esa:ESA_03588%09red/esa:ESA_01108%09red/esa:ESA_02970%09red/esa:ESA_01658%09red/esa:ESA_02220%09red/esa:ESA_02224%09red/esa:ESA_02483%09red/esa:ESA_00824%09red/esa:ESA_01382%09red/esa:ESA_01383%09red/esa:ESA_00453%09red/esa:ESA…
Biosynthesis of secondary metabolites	esa01110	116	282	0.46544	esa:ESA_02661|esa:ESA_00052|esa:ESA_02665|esa:ESA_01483|esa:ESA_02209|esa:ESA_03267|esa:ESA_00653|esa:ESA_03822|esa:ESA_03821|esa:ESA_00718|esa:ESA_02784|esa:ESA_00343|esa:ESA_01574|esa:ESA_03475|esa:ESA_04383|esa:ESA_03477|esa:ESA_00507|esa:ESA_00466|esa:ESA_03260|esa:ESA_03261|esa:ESA_01897|esa:ESA_03643|esa:ESA_02215|esa:ESA_03885|esa:ESA_03168|esa:ESA_02467|esa:ESA_01178|esa:ESA_01179|esa:ESA…	5550558|5551274|5550542|5551904|5551990|5551642|5551395|5548183|5548122|5549650|5552295|5549327|5550086|5551210|5548208|5551219|5552176|5549680|5551753|5551651|5549001|5550405|5551955|5548677|5549566|5550935|5548752|5548669|5548980|5552186|5550629|5551142|5548543|5548188|5551211|5550393|5548716|5551804|5549355|5549089|5549173|5548227|5549433|5551809|5548939|5548666|5548761|5548275|5548326|5549197…	http://www.genome.jp/kegg-bin/show_pathway?esa01110/esa:ESA_01389%09red/esa:ESA_04308%09red/esa:ESA_01364%09red/esa:ESA_00507%09red/esa:ESA_02914%09red/esa:ESA_02919%09red/esa:ESA_02655%09red/esa:ESA_03267%09red/esa:ESA_03261%09red/esa:ESA_03260%09red/esa:ESA_00754%09red/esa:ESA_02983%09red/esa:ESA_02414%09red/esa:ESA_00069%09red/esa:ESA_03821%09red/esa:ESA_00067%09red/esa:ESA_00385%09red/esa:ESA…
Phosphotransferase system (PTS)	esa02060	16	37	0.465926	esa:ESA_00467|esa:ESA_01433|esa:ESA_02023|esa:ESA_03877|esa:ESA_00465|esa:ESA_00829|esa:ESA_03388|esa:ESA_01978|esa:ESA_03408|esa:ESA_03686|esa:ESA_01434|esa:ESA_01435|esa:ESA_03685|esa:ESA_03597|esa:ESA_02660|esa:ESA_00830|	5549464|5552282|5549878|5548551|5550295|5550258|5550938|5552310|5549815|5550712|5550082|5550087|5550687|5552332|5550539|5550362|	http://www.genome.jp/kegg-bin/show_pathway?esa02060/esa:ESA_02660%09red/esa:ESA_02023%09red/esa:ESA_03408%09red/esa:ESA_03388%09red/esa:ESA_00829%09red/esa:ESA_03597%09red/esa:ESA_00830%09red/esa:ESA_01978%09red/esa:ESA_03877%09red/esa:ESA_03685%09red/esa:ESA_03686%09red/esa:ESA_01434%09red/esa:ESA_01435%09red/esa:ESA_01433%09red/esa:ESA_00465%09red/esa:ESA_00467%09red
Glycine, serine and threonine metabolism	esa00260	14	33	0.498405	esa:ESA_00067|esa:ESA_03335|esa:ESA_03334|esa:ESA_03821|esa:ESA_04111|esa:ESA_04110|esa:ESA_00426|esa:ESA_02467|esa:ESA_02590|esa:ESA_03364|esa:ESA_04308|esa:ESA_00507|esa:ESA_00425|esa:ESA_00424|	5548980|5551211|5551232|5548122|5552143|5552110|5549571|5550935|5549455|5551058|5549974|5552176|5550260|5550277|	http://www.genome.jp/kegg-bin/show_pathway?esa00260/esa:ESA_00424%09red/esa:ESA_00425%09red/esa:ESA_00426%09red/esa:ESA_04308%09red/esa:ESA_02590%09red/esa:ESA_03821%09red/esa:ESA_00067%09red/esa:ESA_00507%09red/esa:ESA_03335%09red/esa:ESA_02467%09red/esa:ESA_03364%09red/esa:ESA_03334%09red/esa:ESA_04110%09red/esa:ESA_04111%09red
C5-Branched dibasic acid metabolism	esa00660	5	11	0.509359	esa:ESA_03267|esa:ESA_03260|esa:ESA_03261|esa:ESA_02620|esa:ESA_02619|	5551642|5551753|5551651|5550758|5550768|	http://www.genome.jp/kegg-bin/show_pathway?esa00660/esa:ESA_03267%09red/esa:ESA_02619%09red/esa:ESA_02620%09red/esa:ESA_03261%09red/esa:ESA_03260%09red
Peptidoglycan biosynthesis	esa00550	9	21	0.513326	esa:ESA_02692|esa:ESA_02695|esa:ESA_03252|esa:ESA_03251|esa:ESA_03253|esa:ESA_03250|esa:ESA_03582|esa:ESA_04345|esa:ESA_03600|	5550437|5550430|5551801|5551738|5551758|5551783|5552436|5548316|5550677|	http://www.genome.jp/kegg-bin/show_pathway?esa00550/esa:ESA_04345%09red/esa:ESA_03582%09red/esa:ESA_03252%09red/esa:ESA_03253%09red/esa:ESA_03250%09red/esa:ESA_03251%09red/esa:ESA_02695%09red/esa:ESA_03600%09red/esa:ESA_02692%09red
Purine metabolism	esa00230	31	76	0.525616	esa:ESA_00260|esa:ESA_01220|esa:ESA_03380|esa:ESA_03690|esa:ESA_03557|esa:ESA_02787|esa:ESA_03180|esa:ESA_02784|esa:ESA_01392|esa:ESA_00540|esa:ESA_00539|esa:ESA_01398|esa:ESA_03476|esa:ESA_04383|esa:ESA_02245|esa:ESA_00374|esa:ESA_03368|esa:ESA_03975|esa:ESA_00773|esa:ESA_00031|esa:ESA_01387|esa:ESA_00547|esa:ESA_00904|esa:ESA_00754|esa:ESA_03207|esa:ESA_00218|esa:ESA_02215|esa:ESA_00591|esa:ESA…	5550104|5548929|5550998|5550685|5549678|5552280|5550079|5552295|5549355|5551791|5551816|5549316|5551190|5548208|5551839|5550177|5551040|5549047|5550597|5548823|5549178|5551718|5552213|5550737|5552160|5549301|5551955|5552314|5548254|5552605|5551609|	http://www.genome.jp/kegg-bin/show_pathway?esa00230/esa:ESA_00031%09red/esa:ESA_01398%09red/esa:ESA_01220%09red/esa:ESA_00218%09red/esa:ESA_03380%09red/esa:ESA_00374%09red/esa:ESA_00540%09red/esa:ESA_00547%09red/esa:ESA_01387%09red/esa:ESA_03557%09red/esa:ESA_02245%09red/esa:ESA_00967%09red/esa:ESA_03207%09red/esa:ESA_03180%09red/esa:ESA_00904%09red/esa:ESA_03975%09red/esa:ESA_02787%09red/esa:ESA…
Pentose phosphate pathway	esa00030	12	29	0.535407	esa:ESA_00069|esa:ESA_03330|esa:ESA_01189|esa:ESA_03208|esa:ESA_04383|esa:ESA_01389|esa:ESA_02577|esa:ESA_04356|esa:ESA_03368|esa:ESA_00788|esa:ESA_00789|esa:ESA_04177|	5548939|5551215|5548761|5550256|5548208|5549343|5549467|5552360|5551040|5550537|5550527|5550651|	http://www.genome.jp/kegg-bin/show_pathway?esa00030/esa:ESA_04356%09red/esa:ESA_00069%09red/esa:ESA_04177%09red/esa:ESA_01389%09red/esa:ESA_02577%09red/esa:ESA_00789%09red/esa:ESA_03208%09red/esa:ESA_04383%09red/esa:ESA_01189%09red/esa:ESA_03368%09red/esa:ESA_03330%09red/esa:ESA_00788%09red
Starch and sucrose metabolism	esa00500	19	47	0.551151	esa:ESA_00069|esa:ESA_04313|esa:ESA_02513|esa:ESA_01335|esa:ESA_04206|esa:ESA_pESA3p05540|esa:ESA_04322|esa:ESA_01833|esa:ESA_01334|esa:ESA_00852|esa:ESA_01978|esa:ESA_04312|esa:ESA_04321|esa:ESA_01602|esa:ESA_00466|esa:ESA_03956|esa:ESA_pESA3p05541|esa:ESA_01826|esa:ESA_04204|	5548939|5552188|5551535|5551440|5550403|5552632|5548369|5552281|5551541|5550626|5552310|5551973|5552186|5552152|5549680|5548952|5552633|5550944|5550385|	http://www.genome.jp/kegg-bin/show_pathway?esa00500/esa:ESA_04204%09red/esa:ESA_01826%09red/esa:ESA_01335%09red/esa:ESA_01334%09red/esa:ESA_00069%09red/esa:ESA_04206%09red/esa:ESA_04322%09red/esa:ESA_04321%09red/esa:ESA_pESA3p05541%09red/esa:ESA_04312%09red/esa:ESA_04313%09red/esa:ESA_01978%09red/esa:ESA_01833%09red/esa:ESA_01602%09red/esa:ESA_pESA3p05540%09red/esa:ESA_03956%09red/esa:ESA_02513%0…
One carbon pool by folate	esa00670	5	12	0.570689	esa:ESA_03820|esa:ESA_00482|esa:ESA_03290|esa:ESA_00424|esa:ESA_01392|	5550843|5552079|5551464|5550277|5549355|	http://www.genome.jp/kegg-bin/show_pathway?esa00670/esa:ESA_00424%09red/esa:ESA_03820%09red/esa:ESA_01392%09red/esa:ESA_00482%09red/esa:ESA_03290%09red
Propanoate metabolism	esa00640	8	20	0.584102	esa:ESA_02620|esa:ESA_02619|esa:ESA_00882|esa:ESA_03645|esa:ESA_02385|esa:ESA_04278|esa:ESA_03714|esa:ESA_02441|	5550758|5550768|5550271|5550393|5551043|5552383|5552271|5549764|	http://www.genome.jp/kegg-bin/show_pathway?esa00640/esa:ESA_03645%09red/esa:ESA_02441%09red/esa:ESA_02619%09red/esa:ESA_03714%09red/esa:ESA_02385%09red/esa:ESA_04278%09red/esa:ESA_00882%09red/esa:ESA_02620%09red
Cyanoamino acid metabolism	esa00460	3	7	0.586028	esa:ESA_00466|esa:ESA_04018|esa:ESA_04296|	5549680|5548920|5552221|	http://www.genome.jp/kegg-bin/show_pathway?esa00460/esa:ESA_04018%09red/esa:ESA_00466%09red/esa:ESA_04296%09red
Tryptophan metabolism	esa00380	3	7	0.586028	esa:ESA_03714|esa:ESA_02622|esa:ESA_00882|	5552271|5550703|5550271|	http://www.genome.jp/kegg-bin/show_pathway?esa00380/esa:ESA_00882%09red/esa:ESA_03714%09red/esa:ESA_02622%09red
Selenocompound metabolism	esa00450	6	15	0.593141	esa:ESA_01115|esa:ESA_03822|esa:ESA_01364|esa:ESA_00540|esa:ESA_00539|esa:ESA_02090|	5548673|5548183|5549197|5551791|5551816|5549717|	http://www.genome.jp/kegg-bin/show_pathway?esa00450/esa:ESA_00540%09red/esa:ESA_01364%09red/esa:ESA_03822%09red/esa:ESA_02090%09red/esa:ESA_00539%09red/esa:ESA_01115%09red
Glycerolipid metabolism	esa00561	4	10	0.609006	esa:ESA_00088|esa:ESA_03398|esa:ESA_02255|esa:ESA_03835|	5548742|5550915|5551741|5548659|	http://www.genome.jp/kegg-bin/show_pathway?esa00561/esa:ESA_02255%09red/esa:ESA_00088%09red/esa:ESA_03398%09red/esa:ESA_03835%09red
Metabolic pathways	esa01100	251	631	0.625342	esa:ESA_02983|esa:ESA_02596|esa:ESA_02661|esa:ESA_00052|esa:ESA_03398|esa:ESA_02665|esa:ESA_03364|esa:ESA_01737|esa:ESA_00937|esa:ESA_02209|esa:ESA_03267|esa:ESA_02513|esa:ESA_00653|esa:ESA_03822|esa:ESA_03820|esa:ESA_00935|esa:ESA_00718|esa:ESA_00721|esa:ESA_02784|esa:ESA_00343|esa:ESA_01574|esa:ESA_01754|esa:ESA_04006|esa:ESA_pESA3p05541|esa:ESA_00539|esa:ESA_03475|esa:ESA_04093|esa:ESA_04384|e…	5548716|5552363|5550558|5551274|5550915|5550542|5551058|5551366|5552350|5551990|5551642|5551535|5551395|5548183|5550843|5548137|5549650|5549592|5552295|5549327|5550086|5551320|5549101|5552633|5551816|5551210|5551621|5548394|5548208|5551226|5548263|5551254|5551219|5550290|5550815|5549047|5552314|5551947|5552176|5549680|5550685|5551753|5551651|5550405|5551955|5550777|5548395|5550104|5550935|5548966…	http://www.genome.jp/kegg-bin/show_pathway?esa01100/esa:ESA_02573%09red/esa:ESA_04308%09red/esa:ESA_01398%09red/esa:ESA_01364%09red/esa:ESA_01085%09red/esa:ESA_00507%09red/esa:ESA_02658%09red/esa:ESA_02624%09red/esa:ESA_02914%09red/esa:ESA_03110%09red/esa:ESA_02919%09red/esa:ESA_03380%09red/esa:ESA_00684%09red/esa:ESA_00491%09red/esa:ESA_00031%09red/esa:ESA_03267%09red/esa:ESA_03260%09red/esa:ESA…
Bacterial secretion system	esa03070	16	42	0.633315	esa:ESA_00645|esa:ESA_03241|esa:ESA_00027|esa:ESA_00373|esa:ESA_03934|esa:ESA_03948|esa:ESA_03698|esa:ESA_02893|esa:ESA_03978|esa:ESA_03945|esa:ESA_03946|esa:ESA_03917|esa:ESA_02894|esa:ESA_03566|esa:ESA_03921|esa:ESA_03921|	5551430|5551876|5548899|5549699|5548841|5548483|5550333|5548359|5548898|5548813|5551105|5552049|5548343|5550837|5548872|5548872|	http://www.genome.jp/kegg-bin/show_pathway?esa03070/esa:ESA_03566%09red/esa:ESA_00373%09red/esa:ESA_03978%09red/esa:ESA_03241%09red/esa:ESA_00027%09red/esa:ESA_02894%09red/esa:ESA_02893%09red/esa:ESA_03921%09red/esa:ESA_03945%09red/esa:ESA_03946%09red/esa:ESA_03917%09red/esa:ESA_03934%09red/esa:ESA_03948%09red/esa:ESA_03698%09red/esa:ESA_00645%09red
Two-component system	esa02020	50	129	0.636524	esa:ESA_00316|esa:ESA_00315|esa:ESA_01350|esa:ESA_01351|esa:ESA_01309|esa:ESA_01307|esa:ESA_03489|esa:ESA_03488|esa:ESA_02645|esa:ESA_02682|esa:ESA_04048|esa:ESA_03402|esa:ESA_03603|esa:ESA_04209|esa:ESA_01523|esa:ESA_01521|esa:ESA_02947|esa:ESA_00560|esa:ESA_00959|esa:ESA_00327|esa:ESA_03179|esa:ESA_03997|esa:ESA_00164|esa:ESA_00165|esa:ESA_01710|esa:ESA_01288|esa:ESA_01300|esa:ESA_01341|esa:ESA…	5552215|5552085|5549143|5549171|5549058|5549049|5551302|5551404|5550618|5550467|5551159|5550895|5550678|5550380|5549984|5549966|5548484|5551728|5552032|5549377|5549474|5549088|5549089|5549173|5551525|5549051|5549164|5551518|5548235|5549189|5548103|5549146|5551581|5550761|5550744|5548922|5550646|5548456|5549078|5549181|5551367|5549945|5550620|5549884|5549962|5548199|5550482|5548584|5551248|5551697|	http://www.genome.jp/kegg-bin/show_pathway?esa02020/esa:ESA_01309%09red/esa:ESA_01300%09red/esa:ESA_01307%09red/esa:ESA_02641%09red/esa:ESA_01342%09red/esa:ESA_01341%09red/esa:ESA_03603%09red/esa:ESA_02947%09red/esa:ESA_01348%09red/esa:ESA_02614%09red/esa:ESA_00706%09red/esa:ESA_01517%09red/esa:ESA_00560%09red/esa:ESA_02613%09red/esa:ESA_00315%09red/esa:ESA_01518%09red/esa:ESA_02644%09red/esa:ESA…
Valine, leucine and isoleucine degradation	esa00280	3	8	0.657074	esa:ESA_03714|esa:ESA_00882|esa:ESA_00881|	5552271|5550271|5550274|	http://www.genome.jp/kegg-bin/show_pathway?esa00280/esa:ESA_00882%09red/esa:ESA_00881%09red/esa:ESA_03714%09red
Histidine metabolism	esa00340	3	8	0.657074	esa:ESA_01197|esa:ESA_01191|esa:ESA_01198|	5548621|5548666|5552138|	http://www.genome.jp/kegg-bin/show_pathway?esa00340/esa:ESA_01197%09red/esa:ESA_01191%09red/esa:ESA_01198%09red
Sulfur metabolism	esa00920	13	35	0.659827	esa:ESA_00823|esa:ESA_00822|esa:ESA_01745|esa:ESA_03822|esa:ESA_01746|esa:ESA_00734|esa:ESA_04128|esa:ESA_00826|esa:ESA_00825|esa:ESA_00824|esa:ESA_00052|esa:ESA_00540|esa:ESA_00539|	5550387|5550354|5551349|5548183|5551344|5550777|5549639|5550363|5550381|5550371|5551274|5551791|5551816|	http://www.genome.jp/kegg-bin/show_pathway?esa00920/esa:ESA_00823%09red/esa:ESA_00540%09red/esa:ESA_01746%09red/esa:ESA_01745%09red/esa:ESA_04128%09red/esa:ESA_00822%09red/esa:ESA_03822%09red/esa:ESA_00824%09red/esa:ESA_00825%09red/esa:ESA_00826%09red/esa:ESA_00539%09red/esa:ESA_00052%09red/esa:ESA_00734%09red
Pentose and glucuronate interconversions	esa00040	8	22	0.67096	esa:ESA_01754|esa:ESA_01068|esa:ESA_03503|esa:ESA_02139|esa:ESA_00449|esa:ESA_04163|esa:ESA_04356|esa:ESA_04162|	5551320|5551948|5548169|5549471|5549535|5550715|5552360|5550724|	http://www.genome.jp/kegg-bin/show_pathway?esa00040/esa:ESA_03503%09red/esa:ESA_01068%09red/esa:ESA_04356%09red/esa:ESA_01754%09red/esa:ESA_00449%09red/esa:ESA_04163%09red/esa:ESA_04162%09red/esa:ESA_02139%09red
Pyrimidine metabolism	esa00240	22	59	0.672772	esa:ESA_03380|esa:ESA_03690|esa:ESA_03557|esa:ESA_00482|esa:ESA_02286|esa:ESA_01758|esa:ESA_01398|esa:ESA_03482|esa:ESA_03481|esa:ESA_00031|esa:ESA_03298|esa:ESA_03975|esa:ESA_03171|esa:ESA_02435|esa:ESA_02784|esa:ESA_00547|esa:ESA_02245|esa:ESA_00218|esa:ESA_00260|esa:ESA_00591|esa:ESA_00967|esa:ESA_00590|	5550998|5550685|5549678|5552079|5551627|5551277|5549316|5551226|5551254|5548823|5551368|5549047|5549485|5550118|5552295|5551718|5551839|5549301|5550104|5552314|5548254|5551609|	http://www.genome.jp/kegg-bin/show_pathway?esa00240/esa:ESA_00031%09red/esa:ESA_02286%09red/esa:ESA_03298%09red/esa:ESA_00218%09red/esa:ESA_03380%09red/esa:ESA_00547%09red/esa:ESA_03557%09red/esa:ESA_02245%09red/esa:ESA_01758%09red/esa:ESA_00967%09red/esa:ESA_02435%09red/esa:ESA_03975%09red/esa:ESA_03482%09red/esa:ESA_03481%09red/esa:ESA_02784%09red/esa:ESA_00482%09red/esa:ESA_03171%09red/esa:ESA…
Glycolysis / Gluconeogenesis	esa00010	17	46	0.674578	esa:ESA_00069|esa:ESA_03222|esa:ESA_03408|esa:ESA_03885|esa:ESA_03223|esa:ESA_01681|esa:ESA_01682|esa:ESA_01539|esa:ESA_02983|esa:ESA_03407|esa:ESA_02546|esa:ESA_01978|esa:ESA_02590|esa:ESA_00852|esa:ESA_04336|esa:ESA_01387|esa:ESA_02589|	5548939|5552050|5549815|5548677|5551970|5551700|5551699|5549503|5548716|5550879|5552365|5552310|5549455|5550626|5548275|5549178|5549498|	http://www.genome.jp/kegg-bin/show_pathway?esa00010/esa:ESA_04336%09red/esa:ESA_03408%09red/esa:ESA_00069%09red/esa:ESA_02590%09red/esa:ESA_01539%09red/esa:ESA_03407%09red/esa:ESA_01682%09red/esa:ESA_01681%09red/esa:ESA_02589%09red/esa:ESA_03885%09red/esa:ESA_02546%09red/esa:ESA_03223%09red/esa:ESA_03222%09red/esa:ESA_02983%09red/esa:ESA_00852%09red/esa:ESA_01978%09red/esa:ESA_01387%09red
Folate biosynthesis	esa00790	6	17	0.690561	esa:ESA_02563|esa:ESA_01441|esa:ESA_03290|esa:ESA_01085|esa:ESA_00532|esa:ESA_00360|	5552134|5550099|5551464|5548263|5551824|5549937|	http://www.genome.jp/kegg-bin/show_pathway?esa00790/esa:ESA_03290%09red/esa:ESA_01085%09red/esa:ESA_00360%09red/esa:ESA_02563%09red/esa:ESA_00532%09red/esa:ESA_01441%09red
Tyrosine metabolism	esa00350	3	9	0.718857	esa:ESA_02414|esa:ESA_01539|esa:ESA_01682|	5550900|5549503|5551699|	http://www.genome.jp/kegg-bin/show_pathway?esa00350/esa:ESA_01539%09red/esa:ESA_01682%09red/esa:ESA_02414%09red
Degradation of aromatic compounds	esa01220	2	6	0.721429	esa:ESA_01682|esa:ESA_01539|	5551699|5549503|	http://www.genome.jp/kegg-bin/show_pathway?esa01220/esa:ESA_01539%09red/esa:ESA_01682%09red
Phenylalanine metabolism	esa00360	2	6	0.721429	esa:ESA_02414|esa:ESA_01469|	5550900|5552319|	http://www.genome.jp/kegg-bin/show_pathway?esa00360/esa:ESA_01469%09red/esa:ESA_02414%09red
DNA replication	esa03030	6	18	0.733012	esa:ESA_02245|esa:ESA_00108|esa:ESA_03380|esa:ESA_00357|esa:ESA_03975|esa:ESA_01398|	5551839|5549031|5550998|5549525|5549047|5549316|	http://www.genome.jp/kegg-bin/show_pathway?esa03030/esa:ESA_00357%09red/esa:ESA_03975%09red/esa:ESA_02245%09red/esa:ESA_01398%09red/esa:ESA_00108%09red/esa:ESA_03380%09red
Glycerophospholipid metabolism	esa00564	7	21	0.739363	esa:ESA_02255|esa:ESA_02884|esa:ESA_03167|esa:ESA_00964|esa:ESA_01576|esa:ESA_00088|esa:ESA_03739|	5551741|5548224|5549619|5548434|5550178|5548742|5548160|	http://www.genome.jp/kegg-bin/show_pathway?esa00564/esa:ESA_02255%09red/esa:ESA_00088%09red/esa:ESA_03739%09red/esa:ESA_02884%09red/esa:ESA_00964%09red/esa:ESA_03167%09red/esa:ESA_01576%09red
Fatty acid metabolism	esa01212	7	21	0.739363	esa:ESA_02254|esa:ESA_00893|esa:ESA_00882|esa:ESA_00881|esa:ESA_03645|esa:ESA_03121|esa:ESA_03714|	5551744|5552187|5550271|5550274|5550393|5549416|5552271|	http://www.genome.jp/kegg-bin/show_pathway?esa01212/esa:ESA_03645%09red/esa:ESA_02254%09red/esa:ESA_03714%09red/esa:ESA_00882%09red/esa:ESA_00893%09red/esa:ESA_00881%09red/esa:ESA_03121%09red
Methane metabolism	esa00680	10	30	0.758493	esa:ESA_03862|esa:ESA_03863|esa:ESA_02945|esa:ESA_03861|esa:ESA_02102|esa:ESA_03622|esa:ESA_02590|esa:ESA_03364|esa:ESA_03811|esa:ESA_03864|	5548783|5548526|5548594|5548520|5550290|5550528|5549455|5551058|5548356|5548682|	http://www.genome.jp/kegg-bin/show_pathway?esa00680/esa:ESA_03811%09red/esa:ESA_03364%09red/esa:ESA_02590%09red/esa:ESA_03864%09red/esa:ESA_03861%09red/esa:ESA_03622%09red/esa:ESA_03863%09red/esa:ESA_03862%09red/esa:ESA_02945%09red/esa:ESA_02102%09red
Terpenoid backbone biosynthesis	esa00900	4	13	0.768393	esa:ESA_00544|esa:ESA_03168|esa:ESA_02882|esa:ESA_00346|	5551804|5549566|5548227|5549433|	http://www.genome.jp/kegg-bin/show_pathway?esa00900/esa:ESA_03168%09red/esa:ESA_02882%09red/esa:ESA_00346%09red/esa:ESA_00544%09red
Porphyrin and chlorophyll metabolism	esa00860	6	19	0.771156	esa:ESA_01496|esa:ESA_03186|esa:ESA_00385|esa:ESA_00538|esa:ESA_04406|esa:ESA_04366|	5549361|5550245|5552429|5551809|5552200|5548171|	http://www.genome.jp/kegg-bin/show_pathway?esa00860/esa:ESA_00385%09red/esa:ESA_03186%09red/esa:ESA_00538%09red/esa:ESA_04406%09red/esa:ESA_01496%09red/esa:ESA_04366%09red
Biosynthesis of unsaturated fatty acids	esa01040	2	7	0.782936	esa:ESA_03714|esa:ESA_00882|	5552271|5550271|	http://www.genome.jp/kegg-bin/show_pathway?esa01040/esa:ESA_00882%09red/esa:ESA_03714%09red
Vitamin B6 metabolism	esa00750	2	7	0.782936	esa:ESA_00896|esa:ESA_01997|	5552333|5552233|	http://www.genome.jp/kegg-bin/show_pathway?esa00750/esa:ESA_01997%09red/esa:ESA_00896%09red
Ubiquinone and other terpenoid-quinone biosynthesis	esa00130	6	20	0.80507	esa:ESA_00953|esa:ESA_00952|esa:ESA_00951|esa:ESA_00950|esa:ESA_00949|esa:ESA_01483|	5552393|5549461|5549495|5549662|5549516|5551904|	http://www.genome.jp/kegg-bin/show_pathway?esa00130/esa:ESA_00949%09red/esa:ESA_00950%09red/esa:ESA_00951%09red/esa:ESA_00952%09red/esa:ESA_00953%09red/esa:ESA_01483%09red
Sulfur relay system	esa04122	5	17	0.805595	esa:ESA_02213|esa:ESA_02563|esa:ESA_02879|esa:ESA_00721|esa:ESA_00734|	5551999|5552134|5548265|5549592|5550777|	http://www.genome.jp/kegg-bin/show_pathway?esa04122/esa:ESA_00734%09red/esa:ESA_02879%09red/esa:ESA_02213%09red/esa:ESA_02563%09red/esa:ESA_00721%09red
Nucleotide excision repair	esa03420	2	8	0.832163	esa:ESA_02566|esa:ESA_00107|	5552141|5549005|	http://www.genome.jp/kegg-bin/show_pathway?esa03420/esa:ESA_02566%09red/esa:ESA_00107%09red
Mismatch repair	esa03430	6	22	0.860997	esa:ESA_02245|esa:ESA_00108|esa:ESA_03380|esa:ESA_03975|esa:ESA_01398|esa:ESA_00180|	5551839|5549031|5550998|5549047|5549316|5549163|	http://www.genome.jp/kegg-bin/show_pathway?esa03430/esa:ESA_02245%09red/esa:ESA_01398%09red/esa:ESA_03975%09red/esa:ESA_00180%09red/esa:ESA_00108%09red/esa:ESA_03380%09red
Benzoate degradation	esa00362	1	5	0.87039	esa:ESA_00881|	5550274|	http://www.genome.jp/kegg-bin/show_pathway?esa00362/esa:ESA_00881%09red
Carotenoid biosynthesis	esa00906	1	5	0.87039	esa:ESA_00343|	5549327|	http://www.genome.jp/kegg-bin/show_pathway?esa00906/esa:ESA_00343%09red
Taurine and hypotaurine metabolism	esa00430	1	5	0.87039	esa:ESA_04296|	5552221|	http://www.genome.jp/kegg-bin/show_pathway?esa00430/esa:ESA_04296%09red
Fructose and mannose metabolism	esa00051	8	29	0.878406	esa:ESA_03877|esa:ESA_01165|esa:ESA_01166|esa:ESA_04162|esa:ESA_01434|esa:ESA_01435|esa:ESA_01433|esa:ESA_03885|	5548551|5548132|5550815|5550724|5550082|5550087|5552282|5548677|	http://www.genome.jp/kegg-bin/show_pathway?esa00051/esa:ESA_01166%09red/esa:ESA_01165%09red/esa:ESA_04162%09red/esa:ESA_03877%09red/esa:ESA_01434%09red/esa:ESA_01435%09red/esa:ESA_03885%09red/esa:ESA_01433%09red
Base excision repair	esa03410	3	14	0.907497	esa:ESA_04096|esa:ESA_04184|esa:ESA_00353|	5551695|5550586|5549586|	http://www.genome.jp/kegg-bin/show_pathway?esa03410/esa:ESA_04184%09red/esa:ESA_04096%09red/esa:ESA_00353%09red
Biosynthesis of siderophore group nonribosomal peptides	esa01053	1	6	0.907825	esa:ESA_02727|	5550560|	http://www.genome.jp/kegg-bin/show_pathway?esa01053/esa:ESA_02727%09red
Pantothenate and CoA biosynthesis	esa00770	4	18	0.91618	esa:ESA_03235|esa:ESA_03260|esa:ESA_03261|esa:ESA_04093|	5551947|5551753|5551651|5551621|	http://www.genome.jp/kegg-bin/show_pathway?esa00770/esa:ESA_03235%09red/esa:ESA_04093%09red/esa:ESA_03261%09red/esa:ESA_03260%09red
Galactose metabolism	esa00052	5	22	0.925106	esa:ESA_02977|esa:ESA_02513|esa:ESA_03417|esa:ESA_00852|esa:ESA_02589|	5548613|5551535|5549728|5550626|5549498|	http://www.genome.jp/kegg-bin/show_pathway?esa00052/esa:ESA_03417%09red/esa:ESA_02977%09red/esa:ESA_02589%09red/esa:ESA_02513%09red/esa:ESA_00852%09red
Valine, leucine and isoleucine biosynthesis	esa00290	3	15	0.927281	esa:ESA_03267|esa:ESA_03260|esa:ESA_03261|	5551642|5551753|5551651|	http://www.genome.jp/kegg-bin/show_pathway?esa00290/esa:ESA_03267%09red/esa:ESA_03261%09red/esa:ESA_03260%09red
Biotin metabolism	esa00780	3	15	0.927281	esa:ESA_01737|esa:ESA_00893|esa:ESA_02573|	5551366|5552187|5552250|	http://www.genome.jp/kegg-bin/show_pathway?esa00780/esa:ESA_00893%09red/esa:ESA_02573%09red/esa:ESA_01737%09red
Fatty acid biosynthesis	esa00061	3	15	0.927281	esa:ESA_03645|esa:ESA_02254|esa:ESA_00893|	5550393|5551744|5552187|	http://www.genome.jp/kegg-bin/show_pathway?esa00061/esa:ESA_03645%09red/esa:ESA_02254%09red/esa:ESA_00893%09red
Amino sugar and nucleotide sugar metabolism	esa00520	11	43	0.941719	esa:ESA_00069|esa:ESA_01165|esa:ESA_01166|esa:ESA_02655|esa:ESA_00852|esa:ESA_02661|esa:ESA_03582|esa:ESA_01434|esa:ESA_01435|esa:ESA_01433|esa:ESA_02660|	5548939|5548132|5550815|5550592|5550626|5550558|5552436|5550082|5550087|5552282|5550539|	http://www.genome.jp/kegg-bin/show_pathway?esa00520/esa:ESA_00069%09red/esa:ESA_01166%09red/esa:ESA_03582%09red/esa:ESA_01165%09red/esa:ESA_02660%09red/esa:ESA_02661%09red/esa:ESA_01434%09red/esa:ESA_01435%09red/esa:ESA_00852%09red/esa:ESA_02655%09red/esa:ESA_01433%09red
Phenylalanine, tyrosine and tryptophan biosynthesis	esa00400	4	21	0.957266	esa:ESA_02414|esa:ESA_00653|esa:ESA_03643|esa:ESA_02914|	5550900|5551395|5550405|5548505|	http://www.genome.jp/kegg-bin/show_pathway?esa00400/esa:ESA_00653%09red/esa:ESA_02914%09red/esa:ESA_03643%09red/esa:ESA_02414%09red
Riboflavin metabolism	esa00740	1	9	0.966862	esa:ESA_02887|	5548351|	http://www.genome.jp/kegg-bin/show_pathway?esa00740/esa:ESA_02887%09red
Flagellar assembly	esa02040	5	37	0.997634	esa:ESA_02269|esa:ESA_01287|esa:ESA_01288|esa:ESA_02264|esa:ESA_02265|	5551719|5549196|5549051|5551722|5551703|	http://www.genome.jp/kegg-bin/show_pathway?esa02040/esa:ESA_02264%09red/esa:ESA_02265%09red/esa:ESA_01288%09red/esa:ESA_01287%09red/esa:ESA_02269%09red
Lipopolysaccharide biosynthesis	esa00540	1	20	0.999227	esa:ESA_03242|	5552204|	http://www.genome.jp/kegg-bin/show_pathway?esa00540/esa:ESA_03242%09red
Aminoacyl-tRNA biosynthesis	esa00970	5	109	1	esa:ESA_04358|esa:ESA_01115|esa:ESA_00166|esa:ESA_00746|esa:ESA_02658|	5552151|5548673|5549144|5550770|5550573|	http://www.genome.jp/kegg-bin/show_pathway?esa00970/esa:ESA_02658%09red/esa:ESA_01115%09red/esa:ESA_00746%09red/esa:ESA_04358%09red/esa:ESA_00166%09red
